# Supplementary material for: Public health impact model estimating the impact of introducing an adjuvanted recombinant zoster vaccine into the UK universal mass vaccination programme
Source: PubMed Central journal article supplement — BMJ Open. 2019 May 5;9(5):e025553. doi: 10.1136/bmjopen-2018-025553 (PMC6502027; doi:10.1136/bmjopen-2018-025553), 2019-05-05
Supplement: bmjopen-2018-025553.draft_revisions.pdf [file bmjopen-2018-025553.draft_revisions.pdf]

# BMJ Open

BMJ Open is committed to open peer review. As part of this commitment we make the peer review history of every article we publish publicly available.

When an article is published we post the peer reviewers' comments and the authors' responses online. We also post the versions of the paper that were used during peer review. These are the versions that the peer review comments apply to.

The versions of the paper that follow are the versions that were submitted during the peer review process. They are not the versions of record or the final published versions. They should not be cited or distributed as the published version of this manuscript.

BMJ Open is an open access journal and the full, final, typeset and author-corrected version of record of the manuscript is available on our site with no access controls, subscription charges or pay-per-view fees (<http://bmjopen.bmj.com>).

If you have any questions on BMJ Open's open peer review process please email [editorial.bmjopen@bmj.com](mailto:editorial.bmjopen@bmj.com)

# BMJ Open

## Evaluation of the public health impact of introducing a novel Adjuvanted Recombinant Zoster Vaccine into the UK universal mass vaccination programme

|                               |                                                                                                                                                                                                                                                                                           |
|-------------------------------|-------------------------------------------------------------------------------------------------------------------------------------------------------------------------------------------------------------------------------------------------------------------------------------------|
| Journal:                      | <i>BMJ Open</i>                                                                                                                                                                                                                                                                           |
| Manuscript ID                 | bmjopen-2018-025553                                                                                                                                                                                                                                                                       |
| Article Type:                 | Research                                                                                                                                                                                                                                                                                  |
| Date Submitted by the Author: | 30-Jul-2018                                                                                                                                                                                                                                                                               |
| Complete List of Authors:     | van Oorschot, Desiree; GSK Vaccines, Value Evidence<br>Hunjan, Manjit; GlaxoSmithKline<br>Bracke, Benjamin ; GSK Vaccines, Value Evidence<br>Lorenc, Stephane; GSK Vaccines, Value Evidence<br>Curran, Desmond; GlaxoSmithKline, Value Evidence<br>Starkie-Camejo, Helen; GlaxoSmithKline |
| Keywords:                     | Shingles, Adult vaccination, herpes zoster, recombinant zoster vaccine, Public health < INFECTIOUS DISEASES, Health policy < HEALTH SERVICES ADMINISTRATION & MANAGEMENT                                                                                                                  |
|                               |                                                                                                                                                                                                                                                                                           |

SCHOLARONE™  
Manuscripts

Peer Review Only

**TITLE PAGE**

*TYPE OF MANUSCRIPT:*

*MANUSCRIPT TITLE:*

Evaluation of the public health impact of introducing a novel Adjuvanted Recombinant Zoster Vaccine into the UK universal mass vaccination programme

*AUTHOR(S): [ORDER UNDER DISCUSSION]*

Van Oorschot Desirée<sup>1</sup>, Hunjan Manjit<sup>2</sup>, Bracke Benjamin<sup>1</sup>, Lorenc Stéphane<sup>3</sup>, Curran Desmond<sup>1</sup>, Starkie Camejo Helen<sup>2</sup>

*AFFILIATIONS:*

<sup>1</sup> GSK, Wavre, Belgium; <sup>2</sup> GSK, Uxbridge, UK; <sup>3</sup> Freelance, on behalf of GSK, Wavre, Belgium

*CORRESPONDING AUTHOR:*

Name: Van Oorschot Desirée

Mailing Address: Avenue Fleming 20, 1300, Wavre, Belgium

Phone No: +3210855111

E-mail address: desiree.x.van-oorschot@gsk.com

## **ABSTRACT**

### **OBJECTIVES**

In 2013, the Herpes Zoster (HZ) immunisation programme was introduced in the UK for adults 70 years of age (YOA). The Joint Committee on Vaccination and Immunisation (JCVI) based their recommendations on the clinical profile of zoster vaccine live (ZVL), the only vaccine against HZ available at the time. The recently approved Adjuvanted Recombinant Zoster Vaccine (RZV) has a substantially different clinical profile that may offer additional benefits.

This study aimed to 1) assess the public health impact of introducing RZV in the UK compared to the current vaccination strategy and 2) explore via scenario analyses the optimal age-group of vaccination in terms of public health impact.

### **METHODS**

A previously developed health economic model was adapted to the UK setting. The base-case analysis considered individuals 70 YOA, ZVL and first-dose RZV coverage of 48.3%, 70% compliance for the second-dose of RZV over a life-time horizon. Outcomes included reduction of HZ and postherpetic neuralgia (PHN) cases, complication rate and the use of health-care resources. The impact of coverage and second-dose compliance was also explored.

### **RESULTS**

Compared to no revaccination, RZV would lead to a reduction of 30,262 HZ and 5,409 PHN cases while ZVL would lead to a reduction of 7,909 HZ and 3,567 PHN cases. The number needed to vaccinate to prevent 1 HZ case is 12 with RZV and 45 with ZVL. When RZV second-dose compliance is reduced to 60%, fewer HZ and PHN cases would be avoided, though still more than predicted for ZVL. The highest public health impact with RZV could be achieved in individuals 60 or 65 YOA.

### **CONCLUSION**

Under the model assumptions, RZV is predicted to avert more HZ and PHN cases compared to ZVL. Results were robust under different scenario and sensitivity analyses.

## **KEYWORDS**

Herpes Zoster vaccination; adjuvanted recombinant zoster vaccine; public health impact

## **STRENGTHS AND LIMITATIONS OF THIS STUDY**

- The most recent UK-specific data from published literature is included in the ZONA model.
- Model structure and inputs have been validated by external experts.
- Results of this analyses estimate the impact of an RZV program in the UK population in 2018.
- Further analyses have to be performed once data becomes available on the duration of protection of RZV.
- Assumptions regarding second dose compliance had to be made in absence of real-world data.

## INTRODUCTION

The varicella zoster virus (VZV) usually affects children and leads to varicella, also known as chickenpox. The virus remains dormant life-long in patients' dorsal root ganglia.<sup>1</sup> Later in life, VZV specific T-cell-immunity decreases due to immunosenescence or immunosuppressing illnesses or medications. Reactivation of VZV results in herpes zoster (HZ), also called shingles.<sup>2 3</sup> Over 95% of individuals will have acquired VZV during their childhood or early adulthood.<sup>4 5</sup> Approximately one in three people will develop HZ during their life-time with the risk increasing sharply after the age of 50 years of age (YOA), leading to an estimated 5HZ episodes per 1,000 people in the UK, each year.<sup>6-8</sup> Similar incidence rates were reported in other European countries and elsewhere.<sup>2 7</sup> Furthermore, results from observational studies suggest that HZ incidence has risen during the past decade in various countries and is predicted to continue to rise as the average age of the population increases.<sup>2 9 10</sup>

HZ tends to start with prodromal pain, followed by a dermatomal rash which is usually unilateral and develops typically over the trunk or face. Rash is often accompanied by severe pain. Skin lesions and pain usually disappear completely within 4–6 weeks. Postherpetic neuralgia (PHN), often defined as pain persisting or appearing 30 to 90 days after rash onset, is the most common complication which can last from several weeks to months.<sup>8 11</sup> Even though mortality due to HZ infection is low, HZ greatly affects quality of life (QoL) in terms of physical and social functioning and the well-being of the patients.<sup>12</sup> Furthermore, severity of pain strongly correlates with the reported QoL.<sup>11 13</sup> Current treatment options, which mainly rely on antivirals, analgesics and antidepressants, provide only partial symptomatic relief and limited protection against the development of PHN and other complications. Thus, the impact of the disease on patients QoL is not adequately managed with existing interventions.<sup>11</sup>

In the UK, the Joint Committee on Vaccination and Immunisation (JCVI) recommended universal mass vaccination (UMV) for HZ using Zoster Vaccine Live (ZVL; *Zostavax*)<sup>14</sup>, the only vaccine available at the time the UMV programme was introduced in 2013. ZVL is a live-attenuated virus vaccine indicated for the prevention of HZ and, in Europe, of PHN in individuals  $\geq 50$  YOA.<sup>15</sup> Vaccine efficacy (VE) against HZ (VE<sub>HZ</sub>) of ZVL in the shingles prevention study (SPS) was 63.9% in individuals 60-69 YOA and 37.6% in individuals  $\geq 70$  YOA.<sup>15 16</sup> Long-term clinical trial data and observational effectiveness studies showed that VE of ZVL decreased

1  
2  
3 substantially over time conferring no protection against HZ beyond 8 years after  
4 vaccination.<sup>17 18</sup>  
5

6  
7 Even though ZVL is indicated in individuals  $\geq 50$  YOA, the JCVI recommended  
8 vaccination with ZVL at 70 YOA (and a catch-up vaccination for people 78 YOA),  
9 based on clinical trial data and an economic model showing that vaccination at 70  
10 YOA would be the most cost-effective option given that the burden of disease  
11 increases with age, while VE of ZVL decreases in older individuals and over time.<sup>3 14</sup> A  
12 further limitation to the indicated use of ZVL in individuals  $\geq 50$  YOA is its  
13 contraindication in primary or acquired immunodeficiency states due to blood  
14 disorders or other types of cancer, infection with human immunodeficiency virus, or  
15 due to high dose immunosuppressive therapy.<sup>15 19</sup> A proportion of individuals would  
16 therefore not be able to receive ZVL.<sup>20</sup>  
17  
18  
19  
20  
21

22 A novel Adjuvanted Recombinant Zoster Vaccine (RZV, *Shingrix*) has been granted  
23 marketing authorisation by the European Medicines Agency (EMA) and is indicated  
24 for use in individuals  $\geq 50$  YOA. RZV is a non-live vaccine consisting of the VZV  
25 glycoprotein E (gE), a prominent antigen target of VZV-specific CD4+ T-cell immune  
26 responses, and AS01<sub>B</sub> adjuvant system, which boosts immunogenicity and duration  
27 of the immune response.<sup>21</sup> RZV is administered in two doses 2 to 6 months apart and  
28 is not contraindicated in immunocompromised (IC) individuals as it is a non-live  
29 vaccine.<sup>22</sup> Two large, phase III trials, i.e. the Zoster Efficacy Studies in Adults 50 and  
30 70 YOA or older [ZOE-50 (NCT01165177) and ZOE-70 (NCT01165229), respectively]  
31 demonstrated high VE<sub>HZ</sub> of RZV in all age-groups; VE<sub>HZ</sub> was 97.2% in individuals  $\geq 50$   
32 YOA included in the ZOE-50 study and 91.3% in individuals  $\geq 70$  YOA included in the  
33 ZOE-50 and ZOE-70 studies.<sup>23 24</sup> VE persisted over the four-year duration of the  
34 clinical trial.<sup>24</sup>  
35  
36  
37  
38  
39  
40

41 The objective of this study is to explore the public health impact of introducing the  
42 RZV vaccine in the UK in the routine population 70 YOA. The effect of RZV and ZVL on  
43 HZ and PHN incidence, complications and health resource utilisation is compared to  
44 no vaccination. Different scenario analyses are carried out to assess the impact of  
45 first-dose RZV coverage and second-dose RZV compliance and to determine the  
46 optimal age for vaccination.  
47  
48  
49  
50  
51  
52  
53  
54  
55  
56  
57  
58  
59  
60

## **METHODS**

### *PATIENT AND PUBLIC INVOLVEMENT*

Patients or public were not involved as the analysis is based on mathematical modeling.

### *MODEL STRUCTURE*

The ZOster economic Analysis (ZONA), a static multi-cohort Markov model previously developed using Microsoft Excel, was adapted to the UK setting. The economic model considers up to five various age cohorts that can transition between different health states, including no HZ, HZ, health states associated with complications of HZ (PHN and non-PHN complications) and death from HZ or natural causes.<sup>25</sup> Cycle length is set to one year and a life-long time horizon is assumed. The model allows evaluation of three different HZ vaccination strategies: vaccination with RZV, vaccination with ZVL and no vaccination, using single cohorts. Further details regarding the model structure are reported in Curran et al, 2017.<sup>25</sup>

### *MODEL INPUT PARAMETERS*

Wherever possible, UK-specific data were used. Efficacy data for RZV and ZVL were derived from pivotal clinical trials conducted for ZVL and RZV.<sup>16 23 24 26</sup>

### *DEMOGRAPHICS*

Populations in the model are projected to 2018 values. The base-case population consisted of the routine vaccination cohort 70 YOA. Based on projections by the Office of National Statistics (ONS)<sup>27</sup>, the predicted population numbers in the routine cohort of 70 YOA is 722,616, in 2018. Different age cohorts were modelled for use in scenario analyses (Table 1).

All-cause mortality rates were derived from ONS data projected to the year 2018/2019 (Supplementary information [SI] Table 1).<sup>27</sup>



## EPIDEMIOLOGY

### HZ INCIDENCE

HZ incidence was derived from a recent UK Clinical Practice Research Datalink (CPRD) study, which assessed the incidence of HZ in immunocompetent (IC-free) and IC individuals between 2000 and 2012<sup>28</sup> (SI Table 2). The CPRD database study presents the most recent real-world data on HZ incidence and was therefore considered the most appropriate source for this parameter. The IC-free and IC population were matched by age, gender and location of general practitioner (GP) and the proportion of IC individuals was adjusted in the whole population to account for an increase in immunodeficiencies in older individuals. In the age-group 70-79 YOA, 35% of individuals had primary or acquired immunodeficiency and a subgroup of this IC population is contraindicated to receive ZVL. Incidence numbers were converted to annual probabilities of developing HZ (**Error! Reference source not found.**). Lower and upper ranges of probabilities for HZ incidence in the whole population were obtained from published data since it was not possible to derive it from the split IC and IC-free data set analysed in the CPRD study<sup>3</sup> (SI Table 3).

Incidence rate of recurrent HZ is assumed to be the same as the incidence of the initial event. This assumption is supported by published data which indicates that the incidence rates of initial and recurrent HZ events are similar.<sup>29</sup>

### PHN PROBABILITY

PHN is defined as pain appearing or persisting for more than 3 months after initiation of HZ. PHN incidence was derived from published data.<sup>8 30</sup> Gauthier et al. derived PHN incidence from the CPRD in the population excluding patients with underlying IC conditions using prescription medication records on top of PHN codes to identify these episodes. Forbes et al reported odds ratios of developing PHN for people with human immunodeficiency virus and hematopoietic stem cell transplantation compared to IC-free population and these data were used in combination with data reported by Gauthier et al. to model the proportion of PHN cases following an episode of HZ in the general population (**Error! Reference source not found.**, SI Table 4). As for HZ, the model assumes that the incidence of recurrent PHN is the same as for first-time PHN.

### *HZ-RELATED MORTALITY*

Values for HZ-associated mortality are based on published literature<sup>31</sup> (SI Table 5). The study by Edmunds et al. was the only report including a granular breakdown of HZ case fatality rate by age-group in the UK and was therefore considered to be the most appropriate source for HZ-associated mortality. The published data are based on the population of England and Wales. However, increasing mortality with increasing age is consistent with observations from studies conducted in other countries<sup>32</sup> and it is assumed that these rates apply to the entire UK population.

### *NON-PHN COMPLICATIONS*

A wide range of complications other than PHN can occur in people experiencing an episode of HZ and could have a substantial impact on the burden of the disease. In the model, four main categories of complications were included, i.e., ocular, neurological, cutaneous and other non-pain complications. Probabilities of developing these complications after the initial HZ episodes were taken from published literature<sup>29</sup> (**Error! Reference source not found.**).

### *HOSPITALISATION AND GP VISITS DUE TO COMPLICATIONS*

The CPRD study was used to derive the proportion of patients being hospitalised or visiting their GP due to HZ-related complications.<sup>28</sup> Hospitalisation rates were higher in the IC cohort for all age-groups. In addition, health-care resource use was higher in older adults (SI Tables 6 & 7).

### *VACCINE EFFICACY AND SAFETY*

#### *EFFICACY*

Vaccine efficacy against HZ and PHN ( $VE_{HZ}$  and  $VE_{PHN}$ , respectively) were derived from the SPS trial and the Zoster Efficacy and Safety Study (ZEST) for ZVL and from the ZOE-50 and ZOE-70 trials for RZV<sup>16 23 24 26</sup> (Table 1, SI Table 8). VE for RZV is based on a 2-dose schedule given 2 months apart. However, compliance with 2<sup>nd</sup> dose RZV is likely < 100% in practice. Therefore, efficacy data for 1-dose RZV were analysed post-hoc based on limited clinical data from individuals in the ZOE trials receiving only 1-dose RZV.<sup>25</sup>

Waning for both vaccines was modelled by linear fitting, using data from the above-

1  
2  
3 mentioned trials as well as from the long-term persistence study (LTPS) for ZVL.<sup>25</sup> For  
4 RZV, waning rates were assumed to be 1% (range: 0%, 2.6%) during the first 4 years  
5 after vaccination and 2.3% (range: 0.7%, 4.6%) thereafter in individuals < 70 YOA. In  
6 the population ≥ 70 YOA, waning rate was assumed to be constant over time at 3.6%  
7 (range: 1.4%, 6.6%).<sup>25</sup> For ZVL, the model indicated a waning rate of 5.4% (range:  
8 4.5%, 6.4%) during the first 4 years after vaccination and 5.1% (range: 4.1%, 6.0%)  
9 thereafter in all age-groups<sup>17 25</sup> (SI Table 9).  
10  
11  
12  
13

#### 14 *COVERAGE AND COMPLIANCE*

  
15

16 In the base-case analysis, coverage is set at 48.3% in line with latest coverage  
17 numbers for the UK.<sup>20</sup> The impact of different coverage rates was assessed in  
18 sensitivity analyses. Compliance with the second-dose of RZV was set to 70%.  
19  
20  
21

#### 22 *OUTCOMES*

  
23

24 The model was used to estimate the avoidance of HZ and PHN cases, complications,  
25 deaths, GP visits and hospitalisations cases, complications due to HZ, HZ-related  
26 deaths and number of GP visits and hospitalisations for three different vaccination  
27 strategies, i.e., vaccination with RZV, vaccination with ZVL and no vaccination. The  
28 number needed to vaccinate (NNV) to avert one case of HZ and PHN was also  
29 evaluated.  
30  
31  
32  
33

#### 34 *SCENARIO ANALYSES*

  
35

36 Different scenario analyses were carried out where assumptions regarding  
37 vaccination coverage and compliance and age at vaccination were changed.  
38  
39

40 In a first scenario analysis, the impact of increasing coverage of RZV to 70% was  
41 explored. A higher coverage of 70% in the UK was deemed plausible considering that  
42 a) the influenza vaccine uptake in people ≥ 65 YOA was 70.5% in 2016/2017<sup>33</sup> and b)  
43 in the absence of a contraindication, vaccinators might not hesitate to administer  
44 the vaccine in IC individuals.  
45  
46  
47

48 In a second scenario analysis, the second-dose compliance was varied, assuming a  
49 lower limit of 60% and an upper limit of 89% reflecting the lowest 10<sup>th</sup> percentile of  
50 the clinical trial second-dose compliance.<sup>25</sup>  
51  
52

53 Finally, the impact of changing the vaccination age on health outcomes was  
54  
55  
56  
57  
58  
59  
60

1  
2  
3 explored. VE is in general higher in younger individuals favouring early vaccination.  
4 On the other hand, duration of protection decreases over time and burden of  
5 disease (severity and duration of HZ and PHN) is higher in older individuals, favouring  
6 vaccination at an older age.<sup>34</sup> The relative balance of these factors may be different  
7 in case of ZVL and RZV, leading to different conclusions regarding optimal  
8 vaccination age.  
9  
10  
11

## 12 *SENSITIVITY ANALYSES*

13  
14  
15 Deterministic sensitivity analyses (DSA) were conducted to test the robustness of the  
16 results subject to changes in input parameters. To this aim, HZ and PHN incidence  
17 rates, VE and waning rates for both vaccines, incidence rate of HZ-related  
18 complications and vaccine-related adverse events, coverage and second-dose  
19 compliance were varied in one-way sensitivity analyses according to pre-defined  
20 ranges. Tornado diagrams were used to illustrate parameters that had the largest  
21 impact on HZ cases avoided.  
22  
23  
24  
25

26 Probabilistic sensitivity analysis (PSA) was carried out to assess the variability of  
27 results when changing parameters concomitantly using Monte Carlo simulation  
28 (5,000 simulations). Each parameter could be attributed a value within its predefined  
29 range and according to the assigned probability distribution. A beta-distribution was  
30 used for all parameters except for vaccine coverage which followed a uniform  
31 distribution. Age-specific incidence parameters which varied across age-groups were  
32 assumed to be correlated using a correlation of 0.5. The results of the PSA are  
33 presented using a histogram displaying the HZ cases avoided with RZV compared  
34 with ZVL.  
35  
36  
37  
38  
39  
40  
41  
42  
43  
44  
45  
46  
47  
48  
49  
50  
51  
52  
53  
54  
55  
56  
57  
58  
59  
60

## **RESULTS**

### *BASE-CASE ANALYSIS*

In the base-case scenario (cohort 70 YOA) RZV reduced the number of HZ and PHN cases by 30,262 and 5,409, respectively, compared to no vaccination. ZVL led to a reduction of 7,909 HZ and 3,567 PHN cases (

For peer review only

1  
2  
3 Table 2). Vaccination with RZV reduced the number of HZ-related complications and  
4 the health-resource use (  
5  
6  
7  
8  
9  
10  
11  
12  
13  
14  
15  
16  
17  
18  
19  
20  
21  
22  
23  
24  
25  
26  
27  
28  
29  
30  
31  
32  
33  
34  
35  
36  
37  
38  
39  
40  
41  
42  
43  
44  
45  
46  
47  
48  
49  
50  
51  
52  
53  
54  
55  
56  
57  
58  
59  
60

For peer review only

1  
2  
3 Table 2). There were few HZ-related deaths; compared to no vaccination, RZV  
4 prevented 8 HZ-related deaths while ZVL prevented none. The NNV to prevent one  
5 case of HZ was 12 with RZV and 45 with ZVL. The NNV to avoid one case of PHN was  
6 65 with RZV and 98 with ZVL, respectively.  
7  
8  
9

#### 10 *SCENARIO ANALYSES*

11  
12 In a first scenario analysis, we increased coverage from 48.3% to 70% for RZV. In this  
13 scenario, an additional 13,596 HZ and 2,430 PHN cases would be prevented in the  
14 routine vaccination cohort (70 YOA) (  
15  
16  
17  
18  
19  
20  
21  
22  
23  
24  
25  
26  
27  
28  
29  
30  
31  
32  
33  
34  
35  
36  
37  
38  
39  
40  
41  
42  
43  
44  
45  
46  
47  
48  
49  
50  
51  
52  
53  
54  
55  
56  
57  
58  
59  
60

1  
2  
3 Figure 1, light blue bar showing the additional proportion of HZ and PHN cases  
4 avoided with RZV compared to no vaccination).  
5  
6

7 In a second scenario analysis, compliance with second-dose of RZV was set to lower  
8 and upper limits of 60% and 89%. Compared to no vaccination, the numbers of HZ  
9 cases avoided with RZV were 28,145 and 34,284 at the lower and upper limits for  
10 compliance, respectively (Figure 2).  
11  
12

13 To determine the optimal age for vaccination, scenario analyses were carried out to  
14 evaluate the public health impact in different age cohorts (50, 60, 65, 70 and 80  
15 YOA) in terms of HZ and PHN cases avoided, resource utilisation and NNV per  
16 100,000 people.  
17  
18

19 In case of RZV, the scenario that led to avoidance of the most HZ cases per 100,000  
20 people would be vaccinating at 60 YOA, while slightly more PHN cases per 100,000  
21 people could be avoided by vaccinating at 65 YOA. In case of ZVL, the number of HZ  
22 cases avoided per 100,000 people would be highest in the 65 YOA cohort, but more  
23 PHN cases per 100,000 people would be avoided in the 70 YOA cohort (Figure  
24 **3Error! Reference source not found.**). In all age-groups, number of HZ and PHN  
25 cases avoided per 100,000 people was higher for RZV compared to ZVL.  
26 Complications avoided ranged from 689 with RZV and 250 with ZVL in the 65 YOA  
27 cohort, to 434 with RZV and 46 with ZVL in the 80 YOA cohort.  
28  
29

30 Consistent with these results, for RZV, the NNV to avoid one case of HZ was lowest in  
31 the 60 YOA (NNV = 9) and the NNV to avoid one case of PHN was lowest in the 65  
32 YOA cohort (NNV = 54) (  
33  
34  
35  
36  
37  
38  
39  
40  
41  
42  
43  
44  
45  
46  
47  
48  
49  
50  
51  
52  
53  
54  
55  
56  
57  
58  
59  
60



1  
2  
3  
4  
5  
6  
7  
8  
9  
10  
11  
12  
13  
14  
15  
16  
17  
18  
19  
20  
21  
22  
23  
24  
25  
26  
27  
28  
29  
30  
31  
32  
33  
34  
35  
36  
37  
38  
39  
40  
41  
42  
43  
44  
45  
46  
47  
48  
49  
50  
51  
52  
53  
54  
55  
56  
57  
58  
59  
60

Table 3).

The higher number of HZ and PHN cases avoided with RZV compared to ZVL across all age cohorts leads to an important reduction in the use of health care resources, which might be an indicator of a reduction in direct costs due to HZ (

For peer review only

1  
2  
3 Table 4). The number of GP visits per 100,000 people avoided is highest for the 60  
4 YOA and 65 YOA cohorts for both vaccines, and consistently higher for RZV  
5 compared to ZVL. The number of hospitalisations avoided increases with increasing  
6 age for RZV, reflecting the increased risk of hospitalisation due to HZ in older  
7 individuals.  
8  
9

### 10 11 *SENSITIVITY ANALYSES*

12  
13 In DSA analyses carried out for the base-case scenario in the age-cohort 70 YOA, the  
14 robustness of results was tested by changing input parameters to their lower and  
15 upper estimated confidence ranges (SI Tables 3 – 5; SI Tables 8 – 9). In the base case  
16 analyses, RZV prevented an additional 22,353 HZ cases as compared to ZVL. The  
17 parameter with the highest impact on the relative advantage of RZV over ZVL was  
18 annual waning of RZV (2 doses)  $VE_{HZ}$  in people  $\geq 70$  YOA, although the highest waning  
19 for RZV would still lead to a reduction of over 13,000 HZ cases compared to ZVL.  
20 Other parameters influencing the number of HZ cases avoided include initial  $VE_{HZ}$  in  
21 people  $\geq 70$  YOA for ZVL and RZV single dose, HZ incidence, and RZV compliance to  
22 second-dose (Figure 4).  
23  
24  
25  
26  
27

28 During PSA, all parameters were varied simultaneously along their predefined  
29 ranges. In all simulations ( $n = 5,000$ ), RZV led to a reduction of HZ cases as compared  
30 to ZVL. The distribution of the number of HZ cases avoided by RZV relative to ZVL is  
31 shown in Figure 5. Overall, 83.1% of simulations predicted that RZV would prevent at  
32 least 15,000 additional HZ cases compared with ZVL in the age-group 70 YOA.  
33  
34  
35  
36

### 37 **DISCUSSION**

38  
39 UMV against HZ using ZVL was introduced in the UK in 2013 and observational  
40 studies suggest that the programme has brought down HZ incidence by  
41 approximately one third in the vaccinated cohorts.<sup>35 36</sup> RZV has been approved by  
42 the EMA in individuals  $\geq 50$  YOA, thereby offering an alternative option to vaccinate  
43 people against HZ in addition to the existing ZVL. The aim of this study was to  
44 evaluate the public health impact of RZV in terms of HZ prevention compared to ZVL  
45 or no vaccination in the UK setting.  
46  
47  
48  
49

50 In the base-case considering the current vaccination cohort of people 70 YOA, RZV  
51 reduced the number of HZ and PHN cases by 30,262 and 5,409 compared to no  
52 vaccination. In comparison, ZVL prevented 7,909 HZ and 3,567 PHN cases as  
53  
54  
55  
56  
57

1  
2  
3 compared to no vaccination. NNV to prevent one episode of HZ was almost four  
4 times lower with RZV compared to ZVL, i.e., 12 with RZV vs 45 with ZVL. In addition,  
5 the estimated number of hospitalisations and GP visits due to HZ and PHN were  
6 substantially lower with RZV compared with ZVL. HZ-related mortality is in general  
7 low; nevertheless, our simulations predicted that 8 deaths could be prevented with  
8 an RZV vaccination strategy while no HZ-related deaths were prevented adopting a  
9 ZVL vaccination strategy.  
10  
11  
12

13  
14 Results were robust under deterministic and probabilistic sensitivity analyses. Annual  
15 waning of RZV VE in people  $\geq 70$  YOA had the greatest impact on the number of HZ  
16 avoided relative to ZVL, but even assuming an extreme assumption on waning, with  
17 an annual waning rate of 6.6%, RZV would prevent an additional 15,704 HZ cases as  
18 compared to ZVL. Other parameters to which the relative vaccination strategies  
19 proved sensitive included annual HZ incidence and  $VE_{HZ}$  of RZV and ZVL. Probabilistic  
20 sensitivity analyses were always in favour of the RZV vaccination strategy with 83.1%  
21 of simulations showing a reduction of at least  $\geq 15,000$  HZ cases with respect to ZVL.  
22 We also tested different scenarios in which coverage and compliance were varied,  
23 assuming that the public health impact would increase as a greater proportion of  
24 individuals would be vaccinated. Increasing the coverage estimate of the first-dose  
25 of RZV from 48.3% to 70% would further reduce HZ and PHN incidence thereby  
26 leading to a greater reduction in healthcare resources used. We hypothesise that the  
27 coverage with RZV might be higher because a proportion of the eligible individuals  
28 are currently not receiving the vaccine with ZVL. Even though the proportion of  
29 individuals with a true contraindication to ZVL is estimated to be small (2.8%<sup>20</sup>) HZ  
30 vaccination with ZVL might be withheld even in those IC individuals who are not  
31 contraindicated as vaccinators may have been risk averse. Reducing RZV compliance  
32 to 60%, RZV would still prevent approximately three times more HZ cases compared  
33 to ZVL. This is in line with a recent public health impact study carried out for the  
34 German setting where a compliance rate of 50% would still lead to an improvement  
35 of 200% over ZVL in terms of HZ prevention.<sup>25</sup>  
36  
37  
38  
39  
40  
41  
42  
43  
44  
45

46 The recommended vaccination strategy was based on the clinical profile of ZVL, the  
47 only vaccine available at the time. In its recommendation, the JCVI noted that ZVL VE  
48 decreases with increasing age and over time; hence, the current age cohort eligible  
49 for vaccination, i.e., individuals 70 YOA, is a compromise to optimise limited efficacy  
50 and duration of protection against HZ. The JCVI also stated that optimal age at  
51 vaccination would depend on the characteristics of any given vaccine.<sup>37</sup> Therefore,  
52  
53  
54  
55  
56  
57  
58  
59  
60

1  
2  
3 the impact of vaccination age on HZ and PHN incidence was explored through  
4 scenario analyses including different age-cohorts (50, 60, 65, 70 and 80 YOA). The  
5 number of HZ and PHN cases avoided per 100,000 people was higher with RZV than  
6 with ZVL across all age cohorts. In case of RZV, most HZ cases were avoided in the 60  
7 YOA cohort, while PHN case avoidance was highest in the 65 YOA cohort. This  
8 observation is consistent with a higher probability of developing PHN at an increased  
9 age. On the other hand, the projected number of PHN cases avoided with ZVL was  
10 highest in the 70 YOA. This finding is due to a top-up efficacy seen with ZVL against  
11 PHN in the population  $\geq 70$  YOA: vaccinated individuals with breakthrough HZ are at  
12 a lower risk of developing PHN as compared to unvaccinated individuals with HZ. In  
13 the individuals  $< 70$  YOA, no additional protection against PHN was observed in  
14 clinical studies with ZVL. For RZV no additional top-up efficacy could be calculated  
15 based on the limited number of breakthrough cases, and thus  $VE_{HZ}$  and  $VE_{PHN}$  were  
16 assumed to be the same. As a result, for RZV, the NNV to avoid one case of HZ and  
17 PHN was lowest for the 60 YOA and 65 YOA cohorts. NNV increased in the 70 YOA  
18 and more so in the 80 YOA, where a proportion of the simulated cohort died due to  
19 natural causes before any health benefit of vaccination occurred.  
20  
21  
22  
23  
24  
25  
26

27  
28 From a health care utilisation perspective, RZV reduced the number of GP visits by  
29 more than 13,000 compared to ZVL in all age-groups. The highest reduction in GP  
30 visits was predicted in the 65 YOA cohort, while the largest impact on  
31 hospitalisations was predicted for the 80 YOA cohort. The latter might be explained  
32 by the higher risk of hospitalisation inherent to older individuals due to a higher  
33 degree of frailty. Nevertheless, it should be noted that the reduction in  
34 hospitalisations was predicted to be several-fold higher with RZV compared to ZVL in  
35 all age-cohorts. Reduction in the use of health care resources is a good indicator of  
36 potential decrease in direct costs of new health care interventions; however, this  
37 requires further investigation in a cost-effectiveness analysis with RZV in the UK  
38 context.  
39  
40  
41  
42  
43

44 The potential public health impact of RZV in the UK setting has previously been  
45 studied by our group.<sup>38</sup> The study showed a substantial reduction in HZ and PHN  
46 cases compared to no vaccination; however, no comparison was made to ZVL. A  
47 number of studies have evaluated the impact of ZVL on disease burden and  
48 associated cost-effectiveness in the UK setting. Van Hoek et al. analysed cost-  
49 effectiveness of ZVL in different age-groups with the base-case considering a cohort  
50 of immunocompetent 65-year-old individuals in the UK. This cohort was modelled  
51  
52  
53  
54  
55  
56  
57  
58  
59  
60

1  
2  
3 over a life-time and a vaccine coverage of 73.5%.<sup>3</sup> Waning rates might have been  
4 underestimated in this model since long-term data from the LTPS study for  
5 persistence of efficacy of the ZVL vaccination were not yet taken into account.<sup>25</sup> The  
6 LTPS study showed that  $VE_{HZ}$  of ZVL decreases significantly over time with no  
7 statistically significant protection observed after 8 years of vaccination.<sup>17 18</sup> In the  
8 economic model published by Moore et al., the NNV of ZVL to prevent one case of  
9 ZVL was 15, and hence lower than that found in our simulations. However, the  
10 authors assumed a waning rate of 0%.<sup>10</sup>

11  
12  
13  
14  
15 The public health impact of RZV was also evaluated for other settings, including  
16 Germany, US, Canada and Australia. These studies used a wide range of assumptions  
17 regarding coverage, compliance and duration of vaccine protection for both RZV and  
18 ZVL.<sup>28 39-41</sup> Despite differences in these assumptions, all studies showed a consistent  
19 improvement in the reduction of HZ cases and its complications compared to no  
20 vaccination or vaccination with ZVL. In a recent independent cost-effectiveness study  
21 for the US setting, employing conservative assumptions regarding RZV waning rate,  
22 coverage and compliance, the authors concluded that RZV was more effective  
23 compared to ZVL under the vast majority of assumptions evaluated.<sup>39</sup>

24  
25  
26  
27  
28  
29 As with every model, there are strengths and limitations associated with the  
30 modelling strategy employed. For RZV, most recent UK-specific data available at the  
31 time we conducted this study were used; for HZ incidence the CPRD database, a  
32 large UK-specific database, was analysed and values for both IC and non-IC cohorts  
33 were combined.<sup>28</sup> For PHN incidence, published data from two reports were used to  
34 estimate the PHN probability in the total population including individuals with  
35 immunodeficient states. The estimates of PHN cases prevented are close to real  
36 values, validating our approach. Demographic data projected to the year 2018 were  
37 used based on numbers reported by the ONS.<sup>27</sup> The limitations in this study are  
38 related to assumptions that had to be made in the absence of real-world data,  
39 including coverage with RZV, compliance and long-term waning for RZV. Coverage  
40 and compliance were set to values observed in comparable vaccination programs  
41 and these parameters were varied in scenario and one-way sensitivity analyses.  
42 Results from long-term studies with RZV are still outstanding and follow-up data is  
43 currently limited to 4 years. However, the model has been developed such that it can  
44 be updated once additional data becomes available. For ZVL waning rates, we  
45 included both data from the SPS and the LTPS study<sup>25</sup>; however, data from a recent  
46 observational study evaluating effectiveness of ZVL in the UK were not included as  
47  
48  
49  
50  
51  
52  
53  
54  
55  
56  
57  
58  
59  
60

1  
2  
3 they were not available at the time of modelling.<sup>36</sup> Finally, the rate of HZ-associated  
4 complications was assumed to be the same in all individuals with HZ regardless of  
5 their vaccination status. This assumption ignores the potential benefit vaccination  
6 might have by lowering the severity and duration of break-through HZ cases. Clinical  
7 trial data suggest that  $VE_{HZ}$  and  $VE_{PHN}$  are similar and there is some evidence that  
8 duration and severity of HZ/PHN pain is lower in individuals having received RZV as  
9 compared to unvaccinated individuals.<sup>42</sup>  
10  
11  
12

13  
14 Future research might be directed towards assessing severity and duration of HZ and  
15 PHN cases depending on vaccination status, identifying subgroups of the population  
16 that may have enhanced benefit from the vaccine and evaluating cost-effectiveness  
17 in the current UMV cohort and across different age-cohorts.  
18  
19

20 A lay language summary contextualizing the outcomes and potential impact of this  
21 study for healthcare providers is displayed in Figure 6.  
22  
23  
24  
25  
26

## 27 **CONCLUSION**

28  
29 Within the model assumptions, RZV has the greater public health impact in terms of  
30 HZ and PHN case avoidance and reduction in health care utilisation. When the UMV  
31 was introduced in 2013, vaccinating people at 70 YOA was the best option based on  
32 the vaccine characteristics of ZVL. With the approval of RZV in the US, Canada, Japan  
33 and Europe in adults  $\geq 50$  YOA and given the different clinical profile of the two  
34 available vaccines, the optimal HZ prevention strategy needs to be re-evaluated.  
35 Varying the age at vaccination in the model, we demonstrated that the different  
36 clinical profile of RZV shows a different optimal vaccination strategy compared to  
37 ZVL with the optimal vaccination age being 60 YOA or 65 YOA cohorts while being  
38 superior to ZVL in all age cohorts studied.  
39  
40  
41  
42  
43  
44

## 45 **ACKNOWLEDGEMENTS**

46  
47 Authors would like to Lijoy Varghese for this contribution to the study. They also  
48 want to thank Business & Decision Life Sciences platform for editorial assistance and  
49 publications coordination, on behalf of GSK. Stephanie Garcia coordinated  
50 manuscript development and editorial support. Katrin Spiegel provided writing  
51 support.  
52  
53  
54  
55  
56  
57  
58  
59  
60

## REFERENCES

1. Mueller NH, Gilden DH, Cohrs RJ, et al. Varicella zoster virus infection: clinical features, molecular pathogenesis of disease, and latency. *Neurol Clin* 2008;**26**(3):675-97. doi:10.1016/j.ncl.2008.03.011.
2. Kawai K, Gebremeskel BG, Acosta CJ. Systematic review of incidence and complications of herpes zoster: Towards a global perspective. *BMJ Open* 2014;**4**:e004833. doi:10.1136/bmjopen-2014-004833
3. van Hoek AJ, Gay N, Melegaro A, et al. Estimating the cost-effectiveness of vaccination against herpes zoster in England and Wales. *Vaccine* 2009;**27**(9):1454-67. doi:10.1016/j.vaccine.2008.12.024
4. Johnson RW, Alvarez-Pasquin M-J, Bijl M, et al. Herpes zoster epidemiology, management, and disease and economic burden in Europe: a multidisciplinary perspective. *Therapeutic Advances in Vaccines* 2015;**3**(4):109-20. doi:10.1177/2051013615599151
5. Bollaerts K, Riera-Montes M, Heining U, et al. A systematic review of varicella seroprevalence in European countries before universal childhood immunization: Deriving incidence from seroprevalence data. *Epidemiol Infect* 2017;**145**(13):2666-77. doi:10.1017/S0950268817001546
6. Brisson M, Edmunds WJ, Law B, et al. Epidemiology of varicella zoster virus infection in Canada and the United Kingdom. *Epidemiol Infect* 2001;**127**:305-14. doi:10.1017/S0950268801005921
7. Pinchinat S, Cebrián-Cuenca AM, Bricout H, et al. Similar herpes zoster incidence across Europe: Results from a systematic literature review. *BMC Infect Dis* 2013;**13**:170. doi:10.1186/1471-2334-13-170
8. Gauthier A, Breuer J, Carrington D, et al. Epidemiology and cost of herpes zoster and post-herpetic neuralgia in the United Kingdom. *Epidemiol Infect* 2009;**137**(1):38-47. doi:10.1017/S0950268808000678
9. Varghese L, Standaert B, Olivieri A, et al. The temporal impact of aging on the burden of herpes zoster. *BMC Geriatr* 2017;**17**:30. doi:10.1186/s12877-017-0420-9
10. Moore L, Remy V, Martin M, et al. A health economic model for evaluating a vaccine for the prevention of herpes zoster and post-herpetic neuralgia in the UK. *Cost effectiveness and resource allocation : C/E* 2010;**8**:7-7. doi:10.1186/1478-7547-8-7
11. Gater A, Abetz-Webb L, Carroll S, et al. Burden of herpes zoster in the UK: Findings from the zoster quality of life (ZQOL) study. *BMC Infect Dis* 2014;**14**:402. doi:10.1186/1471-2334-14-402
12. Drolet M, Brisson M, Schmader KE, et al. The impact of herpes zoster and postherpetic neuralgia on health-related quality of life: A prospective study. *CMAJ* 2010;**182**(16):1731-36. doi:10.1503/cmaj.091711
13. Schmader KE, Sloane R, Pieper C, et al. The impact of acute herpes zoster pain and discomfort on functional status and quality of life in older adults. *The Clinical journal of pain* 2007;**23**(6):490-6. doi:10.1097/AJP.0b013e318065b6c9

14. Joint Committee on Vaccination and Immunisation. Joint Committee on Vaccination and Immunisation Statement on varicella and herpes zoster vaccines. available from: [http://webarchive.nationalarchives.gov.uk/20120907151317/http://www.dh.gov.uk/prod\\_consum\\_dh/groups/dh\\_digitalassets/@dh/@ab/documents/digitalasset/dh\\_133599.pdf](http://webarchive.nationalarchives.gov.uk/20120907151317/http://www.dh.gov.uk/prod_consum_dh/groups/dh_digitalassets/@dh/@ab/documents/digitalasset/dh_133599.pdf) [accessed June 26, 2018].
15. Merck Sharp Dohme Ltd. Zostavax Summary of Product Characteristics (SmPC). available from: <https://www.medicines.org.uk/emc/product/6101/smpc> [accessed June 26, 2018].
16. Oxman MN, Levin MJ, Johnson GR, et al. A vaccine to prevent herpes zoster and postherpetic neuralgia in older adults. *NEnglJMed* 2012;**366**(20):1859-69. doi:10.1056/NEJMoa1208410
17. Morrison VA, Johnson GR, Schmader KE, et al. Long-term persistence of zoster vaccine efficacy. *Clin Infect Dis* 2015;**60**(6):900-09. doi:10.1093/cid/ciu918
18. Tseng HF, Harpaz R, Luo Y, et al. Declining Effectiveness of Herpes Zoster Vaccine in Adults Aged  $\geq 60$  Years. *J Infect Dis* 2016;**213**(12):1872-75. doi:10.1093/infdis/jiw047
19. Public Health England. Shingles (herpes zoster), 2016:Chapter 28a-Chapter 28a.
20. Public Health England. Herpes zoster ( shingles ) immunisation programme : September 2016 to August 2017 Report for England. available from: [https://assets.publishing.service.gov.uk/government/uploads/system/uploads/attachment\\_data/file/667636/Annual\\_shingles\\_report\\_2016-2017.pdf](https://assets.publishing.service.gov.uk/government/uploads/system/uploads/attachment_data/file/667636/Annual_shingles_report_2016-2017.pdf) [accessed June 26, 2018].
21. Chlibek R, Pauksens K, Rombo L, et al. Long-term immunogenicity and safety of an investigational herpes zoster subunit vaccine in older adults. *Vaccine* 2016;**34**(6):863-68. doi:10.1016/j.vaccine.2015.09.073
22. GlaxoSmithKline Biologicals SA. Shingrix Summary of Product Characteristics (SmPC). available from: [http://www.ema.europa.eu/docs/en\\_GB/document\\_library/EPAR\\_-\\_Product\\_Information/human/004336/WC500246550.pdf](http://www.ema.europa.eu/docs/en_GB/document_library/EPAR_-_Product_Information/human/004336/WC500246550.pdf) [accessed June 26, 2018].
23. Lal H, Cunningham AL, Godeaux O, et al. Efficacy of an Adjuvanted Herpes Zoster Subunit Vaccine in Older Adults. *N Engl J Med* 2015;**372**(22):2087-96. doi:10.1056/NEJMoa1501184
24. Cunningham AL, Lal H, Kovac M, et al. Efficacy of the Herpes Zoster Subunit Vaccine in Adults 70 Years of Age or Older. *N Engl J Med* 2016;**375**(11):1019-32. doi:10.1056/NEJMoa1603800
25. Curran D, Van Oorschot D, Varghese L, et al. Assessment of the potential public health impact of Herpes Zoster vaccination in Germany. *Hum Vaccin Immunother* 2017;**13**(10):2213-21. doi:10.1080/21645515.2017.1345399
26. Schmader KE, Levin MJ, Gnann JW, et al. Efficacy, safety, and tolerability of herpes zoster vaccine in persons aged 50-59 years. *Clin Infect Dis* 2012;**54**(7):922-28. doi:10.1093/cid/cir970
27. Office of National Statistics. 2014 based National population projections. available from:



- <https://www.ons.gov.uk/file?uri=/peoplepopulationandcommunity/populationandmigration/populationprojections/datasets/localauthoritiesinenglandtable2/2014based/table2.xls> [accessed June 13, 2018].
28. Curran D, Hunjan M, El Ghachi A, et al. Herpes Zoster Related Healthcare Burden And Costs In Both Immunocompromised (IC) And IC-Free Populations In The United Kingdom. *Value Health* 2017;**20**(9):A786. doi:10.1016/j.jval.2017.08.2296
29. Yawn BP, Saddier P, Wollan PC, et al. A population-based study of the incidence and complication rates of herpes zoster before zoster vaccine introduction. *Mayo Clin Proc* 2007;**82**(11):1341-9.
30. Forbes HJ, Thomas SL, Smeeth L, et al. A systematic review and meta-analysis of risk factors for postherpetic neuralgia. *Pain* 2016;**157**(1):30-54. doi:10.1097/j.pain.0000000000000307
31. Edmunds WJ, Brisson M, Rose JD. The epidemiology of herpes zoster and potential cost-effectiveness of vaccination in England and Wales. *Vaccine* 2001;**19**(23-24):3076-90. doi:10.1016/S0264-410X(01)00044-5
32. Bricout H, Haugh M, Olatunde O, et al. Herpes zoster-associated mortality in Europe: A systematic review. *BMC Public Health* 2015;**15**(1):466. doi:10.1186/s12889-015-1753-y
33. Public Health England. Influenza: the green book, chapter 19. available from: [https://assets.publishing.service.gov.uk/government/uploads/system/uploads/attachment\\_data/file/663694/Greenbook\\_chapter\\_19\\_Influenza\\_.pdf](https://assets.publishing.service.gov.uk/government/uploads/system/uploads/attachment_data/file/663694/Greenbook_chapter_19_Influenza_.pdf) [accessed June 29, 2018].
34. Sampathkumar P, Drage LA, Martin DP. Herpes zoster (Shingles) and postherpetic neuralgia. *Mayo Clin Proc* 2009;**84**(3):274-80. doi:10.4065/84.3.274
35. Amirthalingam GA, Nick. Keel, Philip. Mullett, David. Correa, Ana. de Lusignan, Simon. Ramsay, Mary. Evaluation of the effect of the herpes zoster vaccination programme 3 years after its introduction in England: a population-based study. *Lancet Public Health* 2018;**3**:e82-90. doi:10.1016/S2468-2667(17)30234-7
36. Walker JL, Andrews NJ, Amirthalingam G, et al. Effectiveness of herpes zoster vaccination in an older United Kingdom population. *Vaccine* 2018;**36**(17):2371-77. doi:10.1016/j.vaccine.2018.02.021
37. Joint Committee on Vaccination Immunisation. Minute of the meeting on 4 October 2017. available from: [https://www.iostrust.org.uk/sites/default/files/minute\\_2017\\_10\\_draft.pdf](https://www.iostrust.org.uk/sites/default/files/minute_2017_10_draft.pdf) <https://www.bmj.com/content/bmj/345/bmj.e6879.full.pdf> [accessed June 26, 2018].
38. Van Oorschot D, Hunjan M, Varghese L, et al. The public health perspective of an investigational herpes zoster vaccine in the united kingdom (UK). *Value Health* 2016;**19**(7):A400-A00. doi:10.1016/j.jval.2016.09.309
39. Le P, Rothberg MB. Cost-effectiveness of the adjuvanted herpes zoster subunit vaccine in older adults. *JAMA Internal Medicine* 2018;**178**(2):248-58. doi:10.1001/jamainternmed.2017.7431

- 1  
2  
3 40. Varghese L, Nissen M, Olivieri A, et al. Public health perspective of phase III  
4 results of an investigational Herpes Zoster vaccine. Public Health Association  
5 of Australia. *Public Health Association of Australia - Communicable Disease*  
6 *Control Conference*, Brisbane 2015:42.  
7 <https://www.phaa.net.au/documents/item/581> (accessed June 26, 2018).  
8  
9 41. Varghese L, Curran D, Yan S, et al. Estimating the Potential Public Health Impact  
10 of Introducing the HZ/su Vaccine in the US Population Aged  $\geq 50$  Years. *Open*  
11 *Forum Infectious Diseases* 2015;**2**(suppl\_1). doi:10.1093/ofid/ofv133.1477  
12  
13 42. Curran D, Athan E, Diez-Domingo J, et al. Quality-of-Life Impact of an  
14 Investigational Subunit-Adjuvanted Herpes Zoster Vaccine in Adults  $\geq 50$  Years  
15 of Age. *Open Forum Infectious Diseases* 2016;**3**(suppl\_1).  
16 doi:10.1093/ofid/ofw194.77  
17  
18  
19  
20  
21  
22  
23  
24  
25  
26  
27  
28  
29  
30  
31  
32  
33  
34  
35  
36  
37  
38  
39  
40  
41  
42  
43  
44  
45  
46  
47  
48  
49  
50  
51  
52  
53  
54  
55  
56  
57  
58  
59  
60

## ***FOOTNOTES***

### ***TRADEMARK***

Shingrix is a trademark of the GSK group of companies.

Zostavax is a trademark from Merck Sharp & Dohme Corp.

### ***AUTHORS' CONTRIBUTION***

DVO, DC, SL, BB participated to the conception and design of the analysis; DVO, DC, MH developed and adapted the model; DVO, DC, MH, HSC, BB were involved in the collection, analysis and/or interpretation of the data. All authors had full access to the data and approved the final version of the paper for submission.

### ***CONFLICTS OF INTEREST***

DVO, MH, BB, DC and HSC are employees of the GSK group of companies. MH, DC, and HSC hold shares in the GSK group of companies. SL is a freelance consultant working on behalf of the GSK group of companies.

### ***DATA SHARING STATEMENT***

All data used in this study are presented in the manuscript, references to the original material are provided. Please contact the corresponding author shall you require any additional information.

### ***ETHICAL APPROVAL***

Ethical approval is not applicable for modelling analysis.

### ***FUNDING SECTION***

GlaxoSmithKline Biologicals SA funded this study (GSK study identifier: HO-17-18511) and was involved in all stages of study conduct, including analysis of the data. GlaxoSmithKline Biologicals SA also covered all costs associated with the development and publication of this manuscript.

## TABLES AND FIGURES

**Table 1: Demographic, epidemiological and efficacy data according to age group**

| Age                                   |                | 50 YOA              | 60 YOA               | 65 YOA               | 70 YOA               | 80 YOA              |
|---------------------------------------|----------------|---------------------|----------------------|----------------------|----------------------|---------------------|
| Number of people in-age group in 2018 |                | 908,255             | 783,067              | 686,215              | 722,616              | 389,107             |
| HZ incidence per 1,000 individuals    | IC             | 6.85                | 8.80                 | 9.93                 | 11.32                | 12.61               |
|                                       | IC-Free        | 4.9                 | 6.92                 | 8.62                 | 11.04                | 11.02               |
| Proportion developing PHN (%)         |                | 11.42               | 13.89                | 15.71                | 17.12                | 20.42               |
| Non-PHN complications incidence (%)   | Ocular         | 2.87                | 3.82                 | 3.82                 | 4.14                 | 5.41                |
|                                       | Neurological   | 2.46                | 3.17                 | 3.17                 | 5.99                 | 4.23                |
|                                       | Cutaneous      | 1.74                | 1.05                 | 1.05                 | 2.09                 | 2.44                |
|                                       | Other          | 2.03                | 1.63                 | 1.63                 | 2.44                 | 2.85                |
| HZ - Vaccine Efficacy – % (Range)     | RZV<br>2 doses | 98.4<br>(95-100)    | 98.4<br>(95-100)     | 98.4<br>(95-100)     | 97.8<br>(94.1-100)   | 97.8<br>(94.1-100)  |
|                                       | RZV<br>1 dose  | 90.0<br>(58.9-98.9) | 90.0<br>(58.9-98.9)  | 90.0<br>(58.9-98.9)  | 69.5<br>(24.9-89.1)  | 69.5<br>(24.9-89.1) |
|                                       | ZVL            | 69.8<br>(54.1-80.6) | 63.9<br>(56.0-71.0)  | 63.9<br>(56.0-71.0)  | 40.85<br>(28.0-52.0) | 18.25<br>(0-48.0)   |
| PHN Vaccine Efficacy – % (Range)      | RZV<br>2 doses | 98.4<br>(95.0-100)  | 98.4<br>(95.0-100)   | 98.4<br>(95.0-100)   | 97.84<br>(94.1-100)  | 97.84<br>(94.1-100) |
|                                       | RZV<br>1 dose  | 90.0<br>(58.9-98.9) | 90.0<br>(58.9-98.9)  | 90.0<br>(58.9-98.9)  | 69.5<br>(24.9-89.1)  | 69.5<br>(24.9-89.1) |
|                                       | ZVL            | 69.8<br>(30.8-89.6) | 65.69<br>(25.4-84.2) | 65.69<br>(25.4-84.2) | 73.38<br>(51.6-85.8) | 39.51<br>(0-73.8)   |

HZ: herpes zoster; IC: immunocompromised; IC-free: immunocompetent; PHN: postherpetic neuralgia; RZV: adjuvanted recombinant zoster vaccine; YOA: years of age; ZVL: zoster vaccine live

**Table 2: Health outcomes and health resource utilisation in the vaccination cohort 70 YOA - base-case analysis, N=722,616**

|                                 | <b>RZV</b> | <b>ZVL</b> | <b>No vaccination</b> | <b>RZV vs no vaccination</b> | <b>ZVL vs no vaccination</b> |
|---------------------------------|------------|------------|-----------------------|------------------------------|------------------------------|
| HZ cases, n                     | 88,643     | 110,996    | 118,905               | 30,262                       | 7,909                        |
| PHN cases, n                    | 16,570     | 18,411     | 21,979                | 5,409                        | 3,567                        |
| <b>HZ-related complications</b> |            |            |                       |                              |                              |
| Total, n                        | 13,109     | 16,405     | 17,565                | 4,455                        | 1,160                        |
| Ocular, n                       | 4,207      | 5,221      | 5,548                 | 1,341                        | 327                          |
| Neurological, n                 | 4,565      | 5,782      | 6,255                 | 1,691                        | 474                          |
| Cutaneous, n                    | 2,001      | 2,492      | 2,658                 | 657                          | 165                          |
| Other non-pain, n               | 2,336      | 2,910      | 3,103                 | 767                          | 193                          |
| <b>Deaths</b>                   |            |            |                       |                              |                              |
| HZ-related deaths, n            | 56         | 64         | 64                    | 8                            | 0                            |
| <b>Resource utilisation</b>     |            |            |                       |                              |                              |
| Hospitalisation, n              | 7,827      | 9,463      | 9,820                 | 1,993                        | 357                          |
| GP visits, n                    | 438,328    | 546,691    | 583,612               | 145,284                      | 36,921                       |

GP: general practitioner; HZ: herpes zoster; PHN: postherpetic neuralgia; n: number of cases; RZV: adjuvanted recombinant zoster vaccine; YOA: years of age; ZVL: zoster vaccine live

**Table 3 NNV to avoid one case of HZ or PHN according to age at vaccination**

| Age cohort | NNV HZ |     | NNV PHN |     |
|------------|--------|-----|---------|-----|
|            | RZV    | ZVL | RZV     | ZVL |
| 50 YOA     | 10     | 39  | 69      | 328 |
| 60 YOA     | 9      | 27  | 55      | 171 |
| 65 YOA     | 10     | 23  | 54      | 134 |
| 70 YOA     | 12     | 45  | 65      | 98  |
| 80 YOA     | 17     | 156 | 82      | 258 |

RZV: adjuvanted recombinant zoster vaccine; HZ: herpes zoster ; YOA: years of age; ZVL: zoster vaccine live; NNV: number needed to vaccinate

For peer review only

**Table 4 Reduction on resource utilisation per 100,000 people**

|        | GP visits avoided |       | Hospitalisations avoided |     |
|--------|-------------------|-------|--------------------------|-----|
|        | RZV               | ZVL   | RZV                      | ZVL |
| 50 YOA | 17,481            | 3,652 | 126                      | 17  |
| 60 YOA | 22,078            | 6,375 | 216                      | 42  |
| 65 YOA | 23,447            | 8,702 | 266                      | 69  |
| 70 YOA | 20,105            | 5,109 | 276                      | 49  |
| 80 YOA | 15,243            | 1,629 | 394                      | 42  |

GP: general practitioner; HZ: herpes zoster; RZV: adjuvanted recombinant zoster vaccine; YOA: years of age; ZVL: zoster vaccine live

For peer review only

1  
2  
3 **Figure 1 Impact of increasing RZV coverage to 70% - Additional HZ and PHN cases avoided (light**  
4 **blue bars) comparing RZV vs no vaccination in people 70 YOA**

5 HZ: herpes zoster; RZV: adjuvanted recombinant zoster vaccine; PHN: postherpetic neuralgia; YOA: years of age

6  
7 **Figure 2 Impact of second-dose RZV compliance on HZ incidence**

8 HZ: herpes zoster; RZV: adjuvanted recombinant zoster vaccine; ZVL: zoster vaccine live

9  
10 **Figure 3 Scenario analyses: HZ (top) and PHN (down) cases avoided per 100,000 individuals for**  
11 **different vaccination cohorts.**

12  
13 HZ: herpes zoster; no vac: no vaccination; PHN: postherpetic neuralgia; RZV: adjuvanted recombinant zoster  
14 vaccine; YOA: years of age; ZVL: zoster vaccine live

15  
16 **Figure 4 Tornado Diagram: HZ cases avoided with RZV compared with ZVL – Base-case analysis (70**  
17 **YOA; coverage 48.3%; compliance 70%)**

18 HZ: herpes zoster; RZV: adjuvanted recombinant zoster vaccine; YOA: years of age; ZVL: zoster vaccine live

19  
20 **Figure 5 Probabilistic Sensitivity Analysis: HZ cases avoided with RZV compared to ZVL**

21 HZ: herpes zoster; RZV: adjuvanted recombinant zoster vaccine; ZVL: zoster vaccine live

22  
23 The orange line shows the percentage of simulations averting at least the number of HZ cases shown on the x-  
24 axis.

25  
26 **Figure 6 Lay language summary of the study**



1  
2  
3  
4  
5  
6  
7  
8  
9  
10  
11  
12  
13  
14  
15  
16  
17  
18  
19  
20  
21  
22  
23  
24  
25  
26  
27  
28  
29  
30  
31  
32  
33  
34  
35  
36  
37  
38  
39  
40  
41  
42  
43  
44  
45  
46  
47  
48  
49  
50  
51  
52  
53  
54  
55  
56  
57  
58  
59  
60

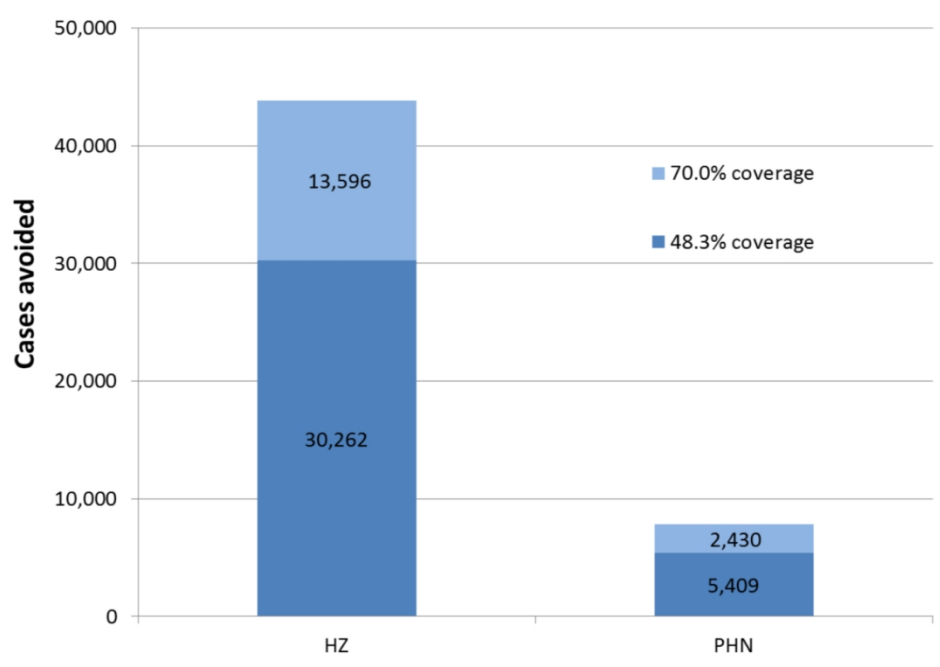

Impact of increasing RZV coverage to 70% - Additional HZ and PHN cases avoided (light blue bars) comparing RZV vs no vaccination in people 70 YOA

131x90mm (300 x 300 DPI)

1  
2  
3  
4  
5  
6  
7  
8  
9  
10  
11  
12  
13  
14  
15  
16  
17  
18  
19  
20  
21  
22  
23  
24  
25  
26  
27  
28  
29  
30  
31  
32  
33  
34  
35  
36  
37  
38  
39  
40  
41  
42  
43  
44  
45  
46  
47  
48  
49  
50  
51  
52  
53  
54  
55  
56  
57  
58  
59  
60

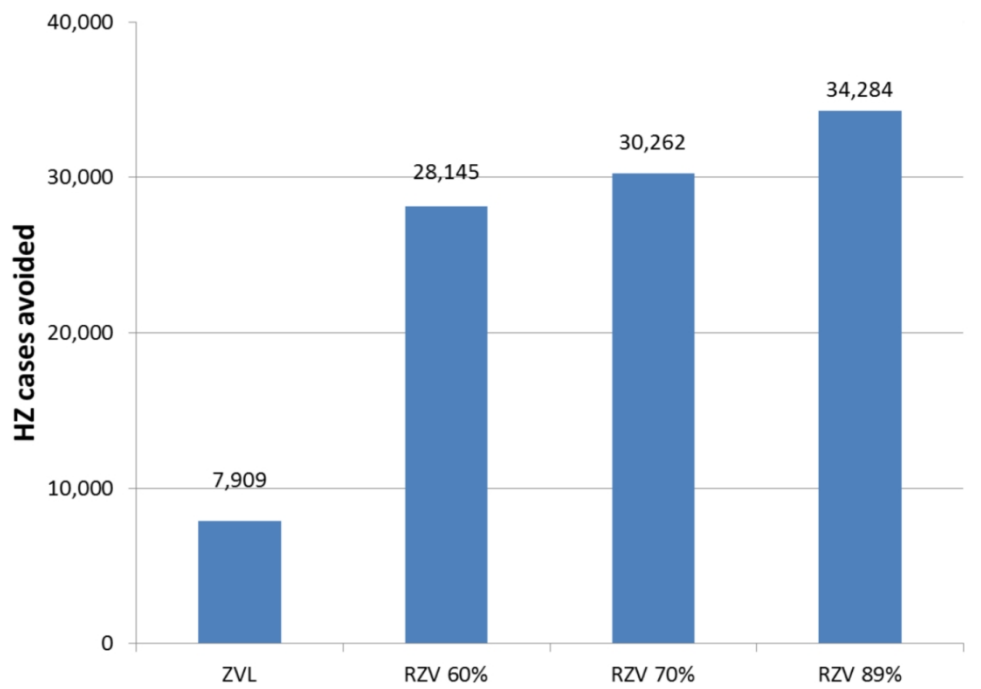

Impact of second-dose RZV compliance on HZ incidence

128x90mm (300 x 300 DPI)

1  
2  
3  
4  
5  
6  
7  
8  
9  
10  
11  
12  
13  
14  
15  
16  
17  
18  
19  
20  
21  
22  
23  
24  
25  
26  
27  
28  
29  
30  
31  
32  
33  
34  
35  
36  
37  
38  
39  
40  
41  
42  
43  
44  
45  
46  
47  
48  
49  
50  
51  
52  
53  
54  
55  
56  
57  
58  
59  
60

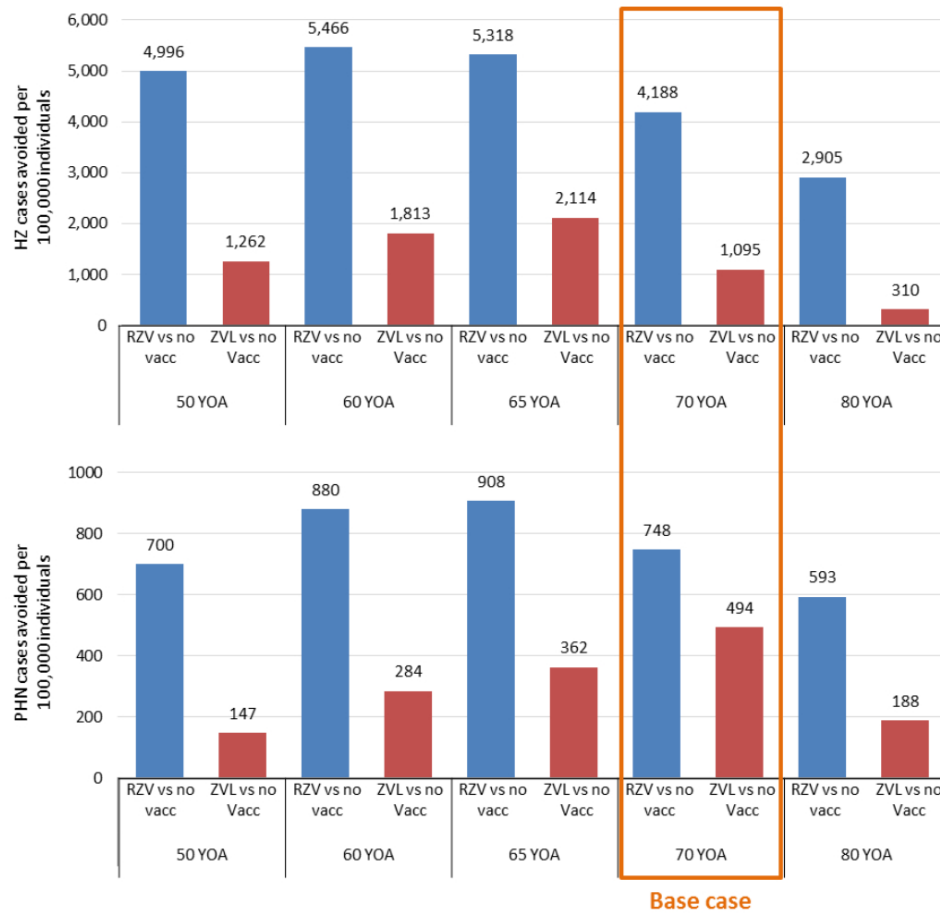

Scenario analyses: HZ (top) and PHN (down) cases avoided per 100,000 individuals for different vaccination cohorts.

91x90mm (300 x 300 DPI)

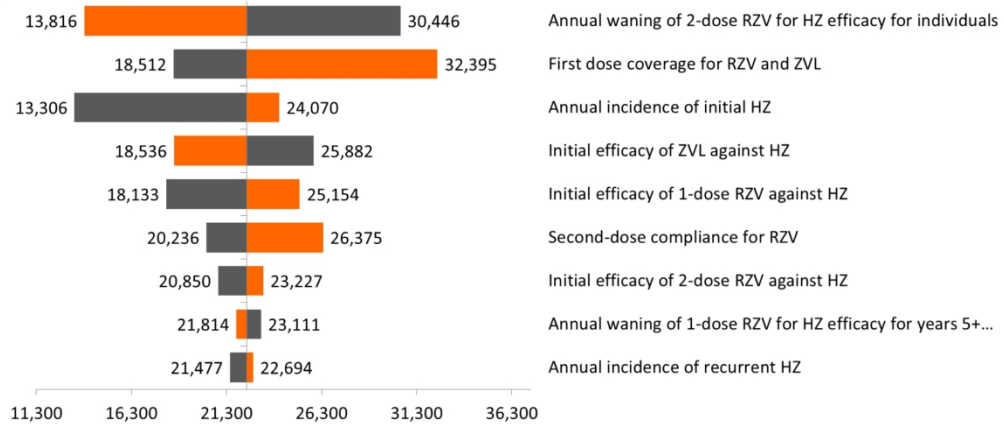

Tornado Diagram: HZ cases avoided with RZV compared with ZVL – Base-case analysis (70 YOA; coverage 48.3%; compliance 70%)

179x77mm (300 x 300 DPI)

1  
2  
3  
4  
5  
6  
7  
8  
9  
10  
11  
12  
13  
14  
15  
16  
17  
18  
19  
20  
21  
22  
23  
24  
25  
26  
27  
28  
29  
30  
31  
32  
33  
34  
35  
36  
37  
38  
39  
40  
41  
42  
43  
44  
45  
46  
47  
48  
49  
50  
51  
52  
53  
54  
55  
56  
57  
58  
59  
60

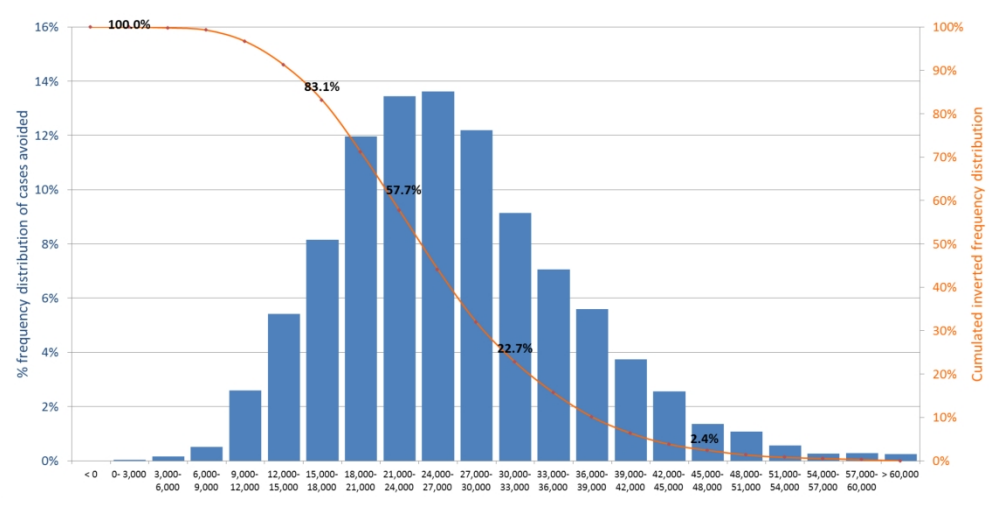

Probabilistic Sensitivity Analysis: HZ cases avoided with RZV compared to ZVL

186x90mm (300 x 300 DPI)

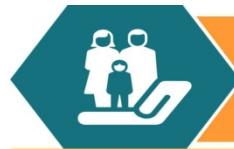

## Focus on the Patient

### What is the context?

Herpes zoster (shingles) is a painful rash that lasts for several weeks and which can lead to prolonged pain even after the initial rash has cleared. Herpes zoster arises when varicella zoster virus, acquired during varicella, reactivates. This happens especially in older people with a weakened immune system. Herpes zoster has a detrimental impact on the quality of life and current treatment options provide only partial symptom relief.

### What is new?

In the UK, a universal mass vaccination programme against herpes zoster has been introduced in 2013. The programme recommends vaccination of people aged 70 or 78 years with a zoster vaccine live, the only vaccine available at that time. In 2018, a new recombinant zoster vaccine against herpes zoster has become available. The goal of this study was to explore the impact of different vaccination strategies using a mathematical model.

### What is the impact?

The model predicts that the recombinant zoster vaccine would lead to a greater reduction in the number of herpes zoster episodes compared to the zoster vaccine live. Furthermore, the model suggests that the duration of protection with the recombinant zoster vaccine lasts longer. If adopting a vaccination strategy with the recombinant zoster vaccine, the optimal age at vaccination would be 60 or 65 years old.

Lay language summary of the study

162x92mm (300 x 300 DPI)

Supplementary Material

Evaluation of the public health impact of  
introducing a novel Adjuvanted Recombinant  
Zoster Vaccine into the UK universal mass  
vaccination programme

Van Oorschot Desirée, Hunjan Manjit, Bracke Benjamin, Lorenc  
Stéphane, Curran Desmond, Starkie Camejo Helen

BMJ Open

**SI Table 1: Mortality in the general UK population in 2018/2019**

| Age (YOA) | Number of deaths | Annual probability of death |
|-----------|------------------|-----------------------------|
| 50-54     | 15,903           | 0.00342                     |
| 55-59     | 22,590           | 0.00544                     |
| 60-64     | 29,886           | 0.008366                    |
| 65-69     | 45,562           | 0.013091                    |
| 70-74     | 65,747           | 0.021570                    |
| 75-79     | 78,692           | 0.036493                    |
| 80-84     | 104,536          | 0.065713                    |
| 85-89     | 114,461          | 0.117689                    |
| 90-94     | 82,948           | 0.198093                    |
| 95-99     | 33,361           | 0.304037                    |
| ≥ 100     | 5,496            | 0.436439                    |

YOA: years of age.

Projected numbers using data reported by the Office of National Statistics based on observed numbers of the UK population in 2014.<sup>1</sup>

The immunocompromised (IC) population was identified as individuals presenting one of the following conditions: Hematopoietic stem cell transplantation, solid organ transplantation, solid organ malignancies, haematological malignancies, human immunodeficiency virus, end-stage renal disease, corticosteroid exposure, other immunosuppressive therapy, other immunodeficiency conditions and autoimmune diseases (rheumatoid arthritis, systemic lupus erythematosus, inflammatory bowel disease, psoriasis, multiple sclerosis, polymyalgia rheumatica and autoimmune thyroiditis).

Herpes Zoster (HZ) incidence for the whole (IC and IC-free) population was calculated by applying a weighting for IC proportion by age group.<sup>2</sup> A unitary weight across the populations was not deemed to be appropriate or robust as prevalence of herpes zoster varies between the age groups; rising with increasing age. This is because applying IC incidence, accounting for the overall proportion of IC (16.2%) irrespective of age group would underestimate the incidence in older people and overestimate it in younger people.



**SI Table 2: Weighting CPRD population for IC proportion by age**

| Age Group (YOA) | Prevalence of IC (%) | IC weighting | IC-free weighting |
|-----------------|----------------------|--------------|-------------------|
| 50-59           | 16.13                | 0.161        | 0.839             |
| 60-64           | 22.26                | 0.223        | 0.777             |
| 65-69           | 27.56                | 0.276        | 0.724             |
| 70-79           | 34.88                | 0.349        | 0.651             |
| ≥ 80            | 42.16                | 0.422        | 0.578             |

CPRD: Clinical Practice Research Datalink; IC: immunocompromised; IC-free: immunocompetent; YOA: years of age

**SI Table 3: Incidence and probability of HZ in the whole population**

| Age (YOA) | Incidence rate/1,000 patient years |         | Probability | Range       |             |
|-----------|------------------------------------|---------|-------------|-------------|-------------|
|           | IC                                 | IC-Free |             | Lower limit | Upper limit |
| 50-59     | 6.85                               | 4.9     | 0.0052      | 0.00375     | 0.00791     |
| 60-64     | 8.8                                | 6.92    | 0.0073      | 0.004392    | 0.009001    |
| 65-69     | 9.93                               | 8.62    | 0.0089      | 0.005108    | 0.010147    |
| 70-79     | 11.32                              | 11.04   | 0.0111      | 0.005975    | 0.011605    |
| ≥ 80      | 12.61                              | 11.02   | 0.0116      | 0.007363    | 0.013955    |

HZ: herpes zoster; IC: immunocompromised; IC-free: immunocompetent; YOA: years of age

**SI Table 4: Proportion of PHN (after 3 months)**

| Age (YOA) | Proportion (%) | Lower limit (%) | Upper limit (%) |
|-----------|----------------|-----------------|-----------------|
| 50-59     | 11.418         | 8.91            | 14.13           |
| 60-64     | 13.894         | 12.03           | 15.88           |
| 65-69     | 15.705         | 13.95           | 17.57           |
| 70-79     | 17.116         | 13.53           | 20.94           |
| ≥ 80      | 20.418         | 17.08           | 23.82           |

PHN: postherpetic neuralgia; YOA: years of age

**SI Table 5 HZ-associated mortality**

| Age (YOA) | Probability | Lower limit | Upper limit |
|-----------|-------------|-------------|-------------|
| 50-54     | 0.00001     | 0.0000063   | 0.000012    |
| 55-59     | 0.00001     | 0.0000063   | 0.000012    |
| 60-64     | 0.00003     | 0.0000189   | 0.000035    |
| 65-69     | 0.00003     | 0.0000189   | 0.000035    |
| 70-74     | 0.00004     | 0.0000245   | 0.000046    |
| 75-79     | 0.00009     | 0.0000644   | 0.000120    |
| 80-84     | 0.00049     | 0.0003409   | 0.000633    |
| 85-89     | 0.00202     | 0.0014126   | 0.002623    |
| 90-94     | 0.00202     | 0.0014126   | 0.002623    |
| 95-99     | 0.00202     | 0.0014126   | 0.002623    |
| ≥ 100     | 0.00202     | 0.0014126   | 0.002623    |

HZ: herpes zoster; YOA: years of age

**SI Table 6: Hospitalisation rates in IC and IC-free cohort, derived from CPRD database**

| Age (YOA) | IC                         | IC-free                    | ALL               |
|-----------|----------------------------|----------------------------|-------------------|
|           | Mean<br>Events 90-365 days | Mean<br>Events 90-365 days | Weighted Average* |
| 50-59     | 0.044                      | 0.007                      | 0.012622          |
| 60-64     | 0.054                      | 0.009                      | 0.019245          |
| 65-69     | 0.050                      | 0.014                      | 0.023713          |
| 70-79     | 0.074                      | 0.030                      | 0.045143          |
| ≥ 80      | 0.168                      | 0.115                      | 0.135529          |

CPRD: Clinical Practice Research Datalink; IC: immunocompromised; IC-free: immunocompetent; YOA: years of age; IC-free: immunocompetent

\*Weighted averages calculated using IC proportions in the CPRD study.

**SI Table 7 GP visits in IC and IC-free cohort, derived from CPRD database**

| Age (YOA) | IC                         | IC-free                    | ALL               |
|-----------|----------------------------|----------------------------|-------------------|
|           | Mean<br>Events 90-365 days | Mean<br>Events 90-365 days | Weighted Average* |
| 50-59     | 3.75                       | 2.69                       | 2.86              |
| 60-64     | 4.41                       | 2.86                       | 3.20              |
| 65-69     | 5.05                       | 3.19                       | 3.70              |
| 70-79     | 5.75                       | 4.09                       | 4.67              |
| ≥ 80      | 6.15                       | 4.59                       | 5.25              |

\*Weighted averages calculated using IC proportions in the CPRD study.

CPRD: Clinical Practice Research Datalink; GP: general practitioner; IC: immunocompromised; IC-free: immunocompetent; YOA: years of age

**SI Table 8: Vaccine Efficacy against HZ and PHN**

| Age (YOA)  | ZVL      |             |             | RZV – 2-dose |             |             | RZV – 1-dose |             |             |
|------------|----------|-------------|-------------|--------------|-------------|-------------|--------------|-------------|-------------|
|            | Efficacy | Lower limit | Upper limit | Efficacy     | Lower limit | Upper limit | Efficacy     | Lower limit | Upper limit |
| <b>HZ</b>  |          |             |             |              |             |             |              |             |             |
| 50-59      | 0.698    | 0.5410      | 0.8060      | 0.984        | 0.9500      | 1.0000      | 0.9          | 0.5890      | 0.9890      |
| 60-64      | 0.6389   | 0.5600      | 0.7100      | 0.984        | 0.9500      | 1.0000      | 0.9          | 0.5890      | 0.9890      |
| 65-69      | 0.6389   | 0.5600      | 0.7100      | 0.984        | 0.9500      | 1.0000      | 0.9          | 0.5890      | 0.9890      |
| 70-79      | 0.4085   | 0.2800      | 0.5200      | 0.9784       | 0.9410      | 1.0000      | 0.695        | 0.2490      | 0.8910      |
| ≥ 80       | 0.1825   | 0.0000      | 0.4800      | 0.9784       | 0.9410      | 1.0000      | 0.695        | 0.2490      | 0.8910      |
| <b>PHN</b> |          |             |             |              |             |             |              |             |             |
| 50-59      | 0.698    | 0.3080      | 0.8960      | 0.984        | 0.9500      | 1.0000      | 0.9          | 0.5890      | 0.9890      |
| 60-64      | 0.6569   | 0.2540      | 0.8420      | 0.984        | 0.9500      | 1.0000      | 0.9          | 0.5890      | 0.9890      |
| 65-69      | 0.6569   | 0.2540      | 0.8420      | 0.984        | 0.9500      | 1.0000      | 0.9          | 0.5890      | 0.9890      |
| 70-79      | 0.7338   | 0.5160      | 0.8580      | 0.9784       | 0.9410      | 1.0000      | 0.695        | 0.2490      | 0.8910      |
| ≥ 80       | 0.3951   | 0.0000      | 0.7380      | 0.9784       | 0.9410      | 1.0000      | 0.695        | 0.2490      | 0.8910      |

HZ: herpes zoster; PHN: postherpetic neuralgia; RZV: adjuvanted recombinant zoster vaccine; YOA: years of age; ZVL: zoster vaccine live

**SI Table 9: Vaccine Waning**

| Vaccine      | Age group (YOA)/years after vaccination | Value  | 5% CI  | 95% CI |
|--------------|-----------------------------------------|--------|--------|--------|
| ZVL – 1-dose | All ages/Years 1-4                      | 0.0543 | 0.0450 | 0.0640 |
|              | All ages/Years 4+                       | 0.0510 | 0.0410 | 0.0600 |
| RZV – 2-dose | < 70 YOA/Years 1-4                      | 0.010  | 0.0000 | 0.0260 |
|              | < 70 YOA/Years 4+                       | 0.0230 | 0.0070 | 0.0460 |
|              | ≥70 YOA/ all years after vaccination    | 0.0360 | 0.0140 | 0.0660 |
| RZV – 1-dose | All ages/Years 1-4                      | 0.0543 | 0.0450 | 0.0640 |
|              | All ages/Years 4+                       | 0.0510 | 0.0410 | 0.0600 |

CI: confidence interval; RZV: adjuvanted recombinant zoster vaccine; YOA: years of age; ZVL: zoster vaccine live

## REFERENCES

1. Office of National Statistics. 2014 based National population projections. available from: <https://www.ons.gov.uk/file?uri=/peoplepopulationandcommunity/populationandmigration/populationprojections/datasets/localauthoritiesinenglandtable2/2014based/table2.xls> [accessed June 13, 2018].
2. Curran D, Hunjan M, El Ghachi A, et al. Herpes Zoster Related Healthcare Burden And Costs In Both Immunocompromised (IC) And IC-Free Populations In The United Kingdom. *Value Health* 2017;**20**(9):A786. doi:10.1016/j.jval.2017.08.2296

For peer review only

| Section/Item                    | Item no | Recommendation                                                                                                                                                                         | Reported on page no/line no | Comment                                                                                                                                                                                                                                                                                                                                                                                                                             |
|---------------------------------|---------|----------------------------------------------------------------------------------------------------------------------------------------------------------------------------------------|-----------------------------|-------------------------------------------------------------------------------------------------------------------------------------------------------------------------------------------------------------------------------------------------------------------------------------------------------------------------------------------------------------------------------------------------------------------------------------|
| <b>Title and abstract</b>       |         |                                                                                                                                                                                        |                             |                                                                                                                                                                                                                                                                                                                                                                                                                                     |
| Title                           | 1       | Identify the study as an economic evaluation or use more specific terms such as “cost-effectiveness analysis”, and describe the interventions compared                                 | p 1                         | Strictly speaking, this is not an economic evaluation but public health impact study, as stated in the title                                                                                                                                                                                                                                                                                                                        |
| Abstract                        | 2       | Provide a structured summary of objectives, perspective, setting, methods (including study design and inputs), results (including base case and uncertainty analyses), and conclusions | P 4/5                       |                                                                                                                                                                                                                                                                                                                                                                                                                                     |
| <b>Introduction</b>             |         |                                                                                                                                                                                        |                             |                                                                                                                                                                                                                                                                                                                                                                                                                                     |
| Background and Objectives       | 3       | Provide an explicit statement of the broader context for the study. Present the study question and its relevance for health policy or practice decisions                               | p. 7<br>p. 8                | Context provided in first paragraph (epidemiology and rise of HZ episodes during past decades)<br>“The objective of this study is to explore the public health impact of introducing the RZV vaccine in the UK in the routine population 70 YOA.”                                                                                                                                                                                   |
| <b>Methods</b>                  |         |                                                                                                                                                                                        |                             |                                                                                                                                                                                                                                                                                                                                                                                                                                     |
| Target population and subgroups | 4       | Describe characteristics of the base case population and subgroups analysed, including why they were chosen                                                                            | p. 8<br>p. 8/p. 12          | See sentence above for base-case scenario (routine population 70 YOA).<br>“Different scenario analyses are carried out to assess the impact of first dose RZV coverage and second dose RZV compliance and to determine the optimal age for vaccination.”<br>Base-case was chosen because representing the current routine vaccination cohort in the UK.<br>Scenario analyses chosen to test uncertainties in coverage and potential |

|                               |     |                                                                                                                                        |              |                                                                                                                                                                                                                                                                        |
|-------------------------------|-----|----------------------------------------------------------------------------------------------------------------------------------------|--------------|------------------------------------------------------------------------------------------------------------------------------------------------------------------------------------------------------------------------------------------------------------------------|
|                               |     |                                                                                                                                        |              | differences in optimal vaccination age between RZV and ZVL as explained on page 12.                                                                                                                                                                                    |
| Setting and location          | 5   | State relevant aspects of the system(s) in which the decision(s) need(s) to be made                                                    | p. 8<br>p. 9 | UK setting where there is UMV currently in place.<br>“The ZOster ecoNomic Analysis (ZONA), a static multi-cohort Markov model previously developed using Microsoft Excel, was adapted to the UK setting”                                                               |
| Study perspective             | 6   | Describe the perspective of the study and relate this to the costs being evaluated                                                     | NA           | Public health impact study, not cost-effectiveness study.                                                                                                                                                                                                              |
| Comparators                   | 7   | Describe the interventions or strategies being compared and state why they were chosen                                                 | p. 9<br>p. 8 | Vaccination with RZV, with ZVL and no vaccination<br><br>UK setting with current UMV with ZVL<br>And a small portion of patients contraindicated to ZVL (no vaccination)                                                                                               |
| Time horizon                  | 8   | State the time horizon(s) over which costs and consequences are being evaluated and say why appropriate                                | p. 10        | “Cycle length is set to one year and a life-long time horizon is assumed.”                                                                                                                                                                                             |
| Discount rate                 | 9   | Report the choice of discount rate(s) used for costs and outcomes and say why appropriate                                              | NA           | Public health impact study, not cost-effectiveness study.                                                                                                                                                                                                              |
| Choice of health outcomes     | 10  | Describe what outcomes were used as the measure(s) of benefit in the evaluation and their relevance for the type of analysis performed | p. 12        | “The model was used to estimate the avoidance of HZ and PHN cases, complications, deaths, GP visits and hospitalisations cases, complications due to HZ, HZ-related deaths and number of GP visits and hospitalisations for three different vaccination strategies...” |
| Measurements of effectiveness | 11a | Single study-based estimates: Describe fully the design features of the single effectiveness study and why the single study            | NA           |                                                                                                                                                                                                                                                                        |

|                                         |     |                                                                                                                                                                                                                                                                                                                        |       |                                                                                                                                                                                                                                                                                                                                      |
|-----------------------------------------|-----|------------------------------------------------------------------------------------------------------------------------------------------------------------------------------------------------------------------------------------------------------------------------------------------------------------------------|-------|--------------------------------------------------------------------------------------------------------------------------------------------------------------------------------------------------------------------------------------------------------------------------------------------------------------------------------------|
|                                         |     | was a sufficient source of clinical effectiveness data                                                                                                                                                                                                                                                                 |       |                                                                                                                                                                                                                                                                                                                                      |
|                                         | 11b | Synthesis-based estimates: Describe fully the methods used for identification of included studies and synthesis of clinical effectiveness data                                                                                                                                                                         | p. 11 | “Vaccine efficacy against HZ and PHN ( $VE_{HZ}$ and $VE_{PHN}$ , respectively) were derived from the SPS trial and the Zoster Efficacy and Safety Study (ZEST) for ZVL and from the ZOE-50 and ZOE-70 trials for RZV (Table 1, SI Table 8).”<br>And following paragraphs for efficacy/waning                                        |
| Measurement of valuation based outcomes | 12  | If applicable, describe the population and methods used to elicit preferences for outcomes                                                                                                                                                                                                                             | NA    | Public health impact study, not cost-effectiveness study.                                                                                                                                                                                                                                                                            |
| Estimating resources and costs          | 13a | Single study-based economic evaluation: Describe approaches used to estimate resource use associated with the alternative interventions.<br>Describe primary or secondary research methods for valuing each resource item in terms of its unit cost. Describe any adjustments made to approximate to opportunity costs | NA    |                                                                                                                                                                                                                                                                                                                                      |
|                                         | 13b | Model-based economic evaluation: Describe approaches and data sources used to estimate resource use associated with model health states. Describe primary or secondary research methods for valuing each resource item in terms of its unit cost. Describe any adjustments made to approximate to opportunity costs    | P. 11 | “The CPRD study was used to derive the proportion of patients being hospitalised or visiting their GP due to HZ-related complications. Hospitalisation rates were higher in the IC cohort for all age-groups. In addition, health-care resource use was higher in older adults (SI Tables 6 & 7).”<br>No unit costs, since PHI study |
| Currency, price date, and conversion    | 14  | Report the dates of the estimated resource quantities and unit costs. Describe methods for adjusting estimated unit costs to the year of reported costs if necessary. Describe                                                                                                                                         | NA    |                                                                                                                                                                                                                                                                                                                                      |

|                    |    |                                                                                                                                                                                                                                                                                                                                                      |                                               |                                                                                                                                                                                                                                                                                                                                                 |
|--------------------|----|------------------------------------------------------------------------------------------------------------------------------------------------------------------------------------------------------------------------------------------------------------------------------------------------------------------------------------------------------|-----------------------------------------------|-------------------------------------------------------------------------------------------------------------------------------------------------------------------------------------------------------------------------------------------------------------------------------------------------------------------------------------------------|
|                    |    | methods for converting costs into a common currency base and the exchange rate                                                                                                                                                                                                                                                                       |                                               |                                                                                                                                                                                                                                                                                                                                                 |
| Choice of model    | 15 | Describe and give reasons for the specific type of decision-analytical model used. Providing a figure to show model structure is strongly recommended                                                                                                                                                                                                | p. 9                                          | “The ZOster ecoNomic Analysis (ZONA), a static multi-cohort Markov model previously developed using Microsoft Excel, was adapted to the UK setting.”<br>Reference is made to Curran et al, 2017 which shows Figure and additional details regarding model structure                                                                             |
| Assumptions        | 16 | Describe all structural or other assumptions underpinning the decision analytical model                                                                                                                                                                                                                                                              | p. 9<br><br>p. 12                             | First paragraph (Model structure) and Curran et al, 2017<br><br>Coverage and compliance assumptions: “In the base-case analysis, coverage is set at 48.3% in line with latest coverage numbers for the UK. The impact of different coverage rates was assessed in sensitivity analyses. Compliance with the second-dose of RZV was set to 70%.” |
| Analytical methods | 17 | Describe all analytical methods supporting the evaluation. This could include methods for dealing with skewed, missing, or censored data; extrapolation methods; methods for pooling data; approaches to validate or make adjustments (such as half cycle corrections) to a model; and methods for handling population heterogeneity and uncertainty | p. 12<br><br>p. 13                            | “Different scenario analyses were carried out where assumptions regarding vaccination coverage and compliance and age at vaccination were changed”<br>And rest of paragraph<br><br>Sensitivity analyses (DSA and PSA) described                                                                                                                 |
| <b>Results</b>     |    |                                                                                                                                                                                                                                                                                                                                                      |                                               |                                                                                                                                                                                                                                                                                                                                                 |
| Study parameters   | 18 | Report the values, ranges, references, and, if used, probability distributions for all parameters. Report reasons or sources for distributions used to represent uncertainty where appropriate. Providing a table to                                                                                                                                 | p. 15<br>SI Tables 3 – 5<br>and Tables 8 - 11 | “In DSA analyses carried out for the base-case scenario in the age-cohort 70 YOA, the robustness of results was tested by changing input parameters to their lower and upper estimated confidence ranges (SI Tables 3 – 5;                                                                                                                      |



|                                                                      |     |                                                                                                                                                                                                                                                                           |                                                            |                                                                                                                                                                                                                                                            |
|----------------------------------------------------------------------|-----|---------------------------------------------------------------------------------------------------------------------------------------------------------------------------------------------------------------------------------------------------------------------------|------------------------------------------------------------|------------------------------------------------------------------------------------------------------------------------------------------------------------------------------------------------------------------------------------------------------------|
|                                                                      |     | show the input values is strongly recommended                                                                                                                                                                                                                             |                                                            | SI Tables 8 - 11)"                                                                                                                                                                                                                                         |
| Incremental costs and outcomes                                       | 19  | For each intervention, report mean values for the main categories of estimated costs and outcomes of interest, as well as mean differences between the comparator groups. If applicable, report incremental cost-effectiveness ratios                                     | p. 14<br>Table 2                                           | "In the base-case scenario (cohort 70 YOA) RZV reduced the number of HZ and PHN cases by 30,262 and 5,409, respectively, compared to no vaccination. ZVL led to a reduction of 7,909 HZ and 3,567 PHN cases ( <b>Error! Reference source not found.</b> )" |
| Characterising uncertainty                                           | 20a | Single study-based economic evaluation: Describe the effects of sampling uncertainty for the estimated incremental cost and incremental effectiveness parameters, together with the impact of methodological assumptions (such as discount rate, study perspective)       | NA                                                         |                                                                                                                                                                                                                                                            |
|                                                                      | 20b | Model-based economic evaluation: Describe the effects on the results of uncertainty for all input parameters, and uncertainty related to the structure of the model and assumptions                                                                                       | p. 13/14<br>Figure 1-3<br>Table 3<br><br>p. 15<br>Figure 4 | Scenario analyses<br><br>Sensitivity analyses                                                                                                                                                                                                              |
| Characterising heterogeneity                                         | 21  | If applicable, report differences in costs, outcomes, or cost-effectiveness that can be explained by variations between subgroups of patients with different baseline characteristics or other observed variability in effects that are not reducible by more information | p. 14<br>Figure 3                                          | Subgroup analyses according to age cohorts                                                                                                                                                                                                                 |
| Discussion                                                           |     |                                                                                                                                                                                                                                                                           |                                                            |                                                                                                                                                                                                                                                            |
| Study findings, limitations, generalisability, and current knowledge | 22  | Summarise key study findings and describe how they support the conclusions reached. Discuss limitations and the generalisability of the findings and how the findings fit with current knowledge                                                                          | p. 15                                                      | "In the base-case considering the current vaccination cohort of people 70 YOA, RZV reduced the number of HZ and PHN cases by 30,262 and 5,409 compared to no vaccination..." and subsequent paragraphs                                                     |

|                       |    |                                                                                                                                                                                                                                                  |          |                                                                                                                |
|-----------------------|----|--------------------------------------------------------------------------------------------------------------------------------------------------------------------------------------------------------------------------------------------------|----------|----------------------------------------------------------------------------------------------------------------|
|                       |    |                                                                                                                                                                                                                                                  | p. 18    | “As with every model, there are strengths and limitations associated with the modelling strategy employed....” |
|                       |    |                                                                                                                                                                                                                                                  | p. 17/18 | Comparison to existing PHI and CE studies.                                                                     |
| Other                 |    |                                                                                                                                                                                                                                                  |          |                                                                                                                |
| Source of funding     | 23 | Describe how the study was funded and the role of the funder in the identification, design, conduct, and reporting of the analysis. Describe other non-monetary sources of support                                                               | p. 20    | Funding                                                                                                        |
| Conflicts of interest | 24 | Describe any potential for conflict of interest of study contributors in accordance with journal policy. In the absence of a journal policy, we recommend authors comply with International Committee of Medical Journal Editors recommendations | p. 20    | Conflict of interest                                                                                           |

# BMJ Open

## Public health impact model estimating the impact of introducing an Adjuvanted Recombinant Zoster Vaccine into the UK universal mass vaccination programme.

|                                 |                                                                                                                                                                                                                                                               |
|---------------------------------|---------------------------------------------------------------------------------------------------------------------------------------------------------------------------------------------------------------------------------------------------------------|
| Journal:                        | <i>BMJ Open</i>                                                                                                                                                                                                                                               |
| Manuscript ID                   | bmjopen-2018-025553.R1                                                                                                                                                                                                                                        |
| Article Type:                   | Research                                                                                                                                                                                                                                                      |
| Date Submitted by the Author:   | 31-Oct-2018                                                                                                                                                                                                                                                   |
| Complete List of Authors:       | van Oorschot, Desiree; GlaxoSmithKline<br>Hunjan, Manjit; GlaxoSmithKline<br>Bracke, Benjamin ; GlaxoSmitKline<br>Lorenc, Stephane; GlaxoSmithKline, Freelance on behalf of GSK<br>Curran, Desmond; GlaxoSmithKline<br>Starkie-Camejo, Helen; GlaxoSmithKline |
| <b>Primary Subject Heading</b>: | Health policy                                                                                                                                                                                                                                                 |
| Secondary Subject Heading:      | Infectious diseases                                                                                                                                                                                                                                           |
| Keywords:                       | Shingles, Adult vaccination, herpes zoster, recombinant zoster vaccine, Public health < INFECTIOUS DISEASES, Health policy < HEALTH SERVICES ADMINISTRATION & MANAGEMENT                                                                                      |
|                                 |                                                                                                                                                                                                                                                               |

SCHOLARONE™  
Manuscripts

1  
2  
3  
4  
5 **TITLE PAGE**  
6  
7

8 **TYPE OF MANUSCRIPT:**  
9

10  
11 **MANUSCRIPT TITLE:**  
12

13 *Public health impact model estimating the impact of introducing an Adjuvanted*  
14 *Recombinant Zoster Vaccine into the UK universal mass vaccination programme*  
15

16  
17 **AUTHOR(S):**  
18

19 Van Oorschot Desirée<sup>1</sup>, Hunjan Manjit<sup>2</sup>, Bracke Benjamin<sup>1</sup>, Lorenc Stéphane<sup>3</sup>, Curran  
20 Desmond<sup>1</sup>, Starkie Camejo Helen<sup>2</sup>  
21  
22

23  
24 **AFFILIATIONS:**  
25

26 <sup>1</sup> GSK, Wavre, Belgium; <sup>2</sup> GSK, Uxbridge, UK; <sup>3</sup> Freelance, on behalf of GSK, Wavre,  
27 Belgium  
28  
29

30  
31 **CORRESPONDING AUTHOR:**  
32

33 Name: Van Oorschot Desirée

34 Mailing Address: Avenue Fleming 20, 1300, Wavre, Belgium

35 Phone No: +3210855111

36 E-mail address: desiree.x.van-oorschot@gsk.com  
37  
38  
39  
40  
41  
42  
43  
44  
45  
46  
47  
48  
49  
50  
51  
52  
53  
54  
55  
56  
57  
58  
59  
60

## ***ABSTRACT***

### ***OBJECTIVES***

In 2013, the Herpes Zoster (HZ) immunisation programme was introduced in the UK, recommending vaccination of adults 70 years of age (YOA) with the zoster vaccine live (ZVL), the only vaccine available at the time. The recently approved Adjuvanted Recombinant Zoster Vaccine (RZV) has a substantially different clinical profile that may offer additional benefits.

This study aimed to 1) assess the public health impact (PHI) of introducing RZV in the UK compared to the current vaccination strategy and 2) explore via scenario analyses the optimal age-group of vaccination in terms of PHI.

### ***DESIGN***

A previously developed health economic model was adapted to the UK setting.

### ***SETTING***

Calculations were based on efficacy data from pivotal clinical trials, HZ incidence and PHN probability from a UK study, and HZ-associated complication rates from published literature.

### ***POPULATION***

The base-case population considered a 2018-projected UK vaccination cohort of individuals 70 YOA.

### ***INTERVENTIONS***

Vaccination with ZVL or RZV, assuming a first-dose coverage of 48.3% for both vaccines and 70% compliance for the second-dose of RZV.

### ***OUTCOME MEASURES***

Outcomes included reduction of HZ and postherpetic neuralgia (PHN) cases, complications and the use of health-care resources over a life-time horizon. The impact of coverage and second-dose compliance was also explored.

## *RESULTS*

Compared to no vaccination, RZV would lead to a reduction of 30,262 HZ and 5,409 PHN cases while ZVL would lead to a reduction of 7,909 HZ and 3,567 PHN cases. The number needed to vaccinate to prevent 1 HZ case is 12 with RZV and 45 with ZVL. The highest PHI with RZV could be achieved in individuals 60 or 65 YOA.

## *CONCLUSION*

Under the model assumptions, RZV is predicted to avert more HZ and PHN cases compared to ZVL. Results were robust under different scenario and sensitivity analyses.

## *KEYWORDS*

Herpes Zoster vaccination; adjuvanted recombinant zoster vaccine; public health impact

## *STRENGTHS AND LIMITATIONS OF THIS STUDY*

- The most recent UK-specific data from published literature is included in the ZONA model.
- Model structure and inputs have been validated by external experts.
- Results of this analyses estimate the impact of an RZV program in the UK population in 2018.
- Further analyses have to be performed once long term effectiveness data becomes available on the duration of protection of RZV.
- Assumptions regarding second dose compliance had to be made in absence of real-world data.

## INTRODUCTION

The varicella zoster virus (VZV) usually affects children and leads to varicella, also known as chickenpox. The virus remains dormant life-long in patients' dorsal root ganglia.<sup>1</sup> Later in life, VZV specific T-cell-immunity decreases due to immunosenescence or immunosuppressing illnesses or medications. Reactivation of VZV results in herpes zoster (HZ), also called shingles.<sup>2 3</sup> Over 95% of individuals will have acquired VZV during their childhood or early adulthood.<sup>4 5</sup> Approximately one in three people will develop HZ during their life-time with the risk increasing sharply after the age of 50 years of age (YOA), leading to an estimated 5 HZ episodes per 1,000 people in the UK, each year.<sup>6-8</sup> Similar incidence rates were reported in other European countries and elsewhere.<sup>2 7</sup> Furthermore, results from observational studies suggest that HZ incidence has risen during the past decade in various countries and is predicted to continue to rise as the average age of the population increases.<sup>2 9 10</sup>

HZ tends to start with prodromal pain, followed by a dermatomal rash which is usually unilateral and develops typically over the trunk or face. Rash is often accompanied by severe pain. Skin lesions and pain usually disappear completely within 4–6 weeks. Postherpetic neuralgia (PHN), often defined as pain persisting or appearing 30 to 90 days after rash onset, is the most common complication which can last from several weeks to months.<sup>8 11</sup> Even though mortality due to HZ infection is low, HZ greatly affects quality of life (QoL) in terms of physical and social functioning and the well-being of the patients.<sup>12</sup> Furthermore, severity of pain strongly correlates with the reported QoL.<sup>11 13</sup> Current treatment options, which mainly rely on antivirals, analgesics and antidepressants, provide only partial symptomatic relief and limited protection against the development of PHN and other complications. Thus, the impact of the disease on patients QoL is not adequately managed with existing interventions.<sup>11</sup>

In the UK, the Joint Committee on Vaccination and Immunisation (JCVI) recommended universal mass vaccination (UMV) for HZ using Zoster Vaccine Live (ZVL; *Zostavax*)<sup>14</sup>, the only vaccine available at the time the UMV programme was introduced in 2013. ZVL is a live-attenuated virus vaccine indicated for the prevention of HZ and, in Europe, of PHN in individuals  $\geq 50$  YOA.<sup>15</sup> Vaccine efficacy (VE) against HZ ( $VE_{HZ}$ ) of ZVL in the shingles prevention study (SPS) was 63.9% in individuals 60-69 YOA and 37.6% in individuals  $\geq 70$  YOA.<sup>15 16</sup> Long-term clinical trial data and observational effectiveness studies showed that VE of ZVL decreased substantially over time conferring little or no protection against HZ beyond 8 years after vaccination.<sup>17 18</sup>

1  
2  
3  
4 Even though ZVL is indicated in individuals  $\geq 50$  YOA, the JCVI recommended  
5 vaccination with ZVL at 70 YOA (and a catch-up vaccination for people 78 YOA), based  
6 on clinical trial data and an economic model showing that vaccination at 70 YOA would  
7 be the most cost-effective option given that the burden of disease increases with age,  
8 while VE of ZVL decreases in older individuals and over time.<sup>3,14</sup> A further limitation to  
9 the indicated use of ZVL in individuals  $\geq 50$  YOA is its contraindication in primary or  
10 acquired immunodeficiency states due to blood disorders or other types of cancer,  
11 infection with human immunodeficiency virus, or due to high dose  
12 immunosuppressive therapy.<sup>15-19</sup> A proportion of individuals would therefore not be  
13 able to receive ZVL.<sup>20</sup>

14  
15  
16  
17  
18  
19  
20 A novel Adjuvanted Recombinant Zoster Vaccine (RZV, *Shingrix*) has been granted  
21 marketing authorisation by the European Medicines Agency (EMA) and is indicated for  
22 use in individuals  $\geq 50$  YOA. RZV is a non-live vaccine consisting of the VZV glycoprotein  
23 E (gE), a prominent antigen target of VZV-specific CD4+ T-cell immune responses, and  
24 AS01<sub>B</sub> adjuvant system, which boosts immunogenicity and duration of the immune  
25 response.<sup>21</sup> RZV is administered in two doses 2 to 6 months apart and is not  
26 contraindicated in immunocompromised (IC) individuals as it is a non-live vaccine. As  
27 with other vaccines, the administration of Shingrix to immunocompromised subjects  
28 should be based on careful consideration of potential benefits and risks.<sup>22</sup> Two large,  
29 phase III trials, i.e. the Zoster Efficacy Studies in Adults 50 and 70 YOA or older [ZOE-50  
30 (NCT01165177) and ZOE-70 (NCT01165229), respectively] demonstrated high VE<sub>HZ</sub> of  
31 RZV in all age-groups; VE<sub>HZ</sub> was 97.2% in individuals  $\geq 50$  YOA included in the ZOE-50  
32 study and 91.3% in individuals  $\geq 70$  YOA included in the ZOE-50 and ZOE-70 studies.<sup>23</sup>  
33  
34  
35  
36  
37  
38  
39  
40  
41  
42  
43  
44  
45  
46  
47  
48  
49  
50  
51  
52  
53  
54  
55  
56  
57  
58  
59  
60  
24 VE persisted over the four-year duration of the clinical trial.<sup>24</sup>

61  
62  
63  
64  
65  
66  
67  
68  
69  
70  
71  
72  
73  
74  
75  
76  
77  
78  
79  
80  
81  
82  
83  
84  
85  
86  
87  
88  
89  
90  
91  
92  
93  
94  
95  
96  
97  
98  
99  
100  
101  
102  
103  
104  
105  
106  
107  
108  
109  
110  
111  
112  
113  
114  
115  
116  
117  
118  
119  
120  
121  
122  
123  
124  
125  
126  
127  
128  
129  
130  
131  
132  
133  
134  
135  
136  
137  
138  
139  
140  
141  
142  
143  
144  
145  
146  
147  
148  
149  
150  
151  
152  
153  
154  
155  
156  
157  
158  
159  
160  
161  
162  
163  
164  
165  
166  
167  
168  
169  
170  
171  
172  
173  
174  
175  
176  
177  
178  
179  
180  
181  
182  
183  
184  
185  
186  
187  
188  
189  
190  
191  
192  
193  
194  
195  
196  
197  
198  
199  
200  
201  
202  
203  
204  
205  
206  
207  
208  
209  
210  
211  
212  
213  
214  
215  
216  
217  
218  
219  
220  
221  
222  
223  
224  
225  
226  
227  
228  
229  
230  
231  
232  
233  
234  
235  
236  
237  
238  
239  
240  
241  
242  
243  
244  
245  
246  
247  
248  
249  
250  
251  
252  
253  
254  
255  
256  
257  
258  
259  
260  
261  
262  
263  
264  
265  
266  
267  
268  
269  
270  
271  
272  
273  
274  
275  
276  
277  
278  
279  
280  
281  
282  
283  
284  
285  
286  
287  
288  
289  
290  
291  
292  
293  
294  
295  
296  
297  
298  
299  
300  
301  
302  
303  
304  
305  
306  
307  
308  
309  
310  
311  
312  
313  
314  
315  
316  
317  
318  
319  
320  
321  
322  
323  
324  
325  
326  
327  
328  
329  
330  
331  
332  
333  
334  
335  
336  
337  
338  
339  
340  
341  
342  
343  
344  
345  
346  
347  
348  
349  
350  
351  
352  
353  
354  
355  
356  
357  
358  
359  
360  
361  
362  
363  
364  
365  
366  
367  
368  
369  
370  
371  
372  
373  
374  
375  
376  
377  
378  
379  
380  
381  
382  
383  
384  
385  
386  
387  
388  
389  
390  
391  
392  
393  
394  
395  
396  
397  
398  
399  
400  
401  
402  
403  
404  
405  
406  
407  
408  
409  
410  
411  
412  
413  
414  
415  
416  
417  
418  
419  
420  
421  
422  
423  
424  
425  
426  
427  
428  
429  
430  
431  
432  
433  
434  
435  
436  
437  
438  
439  
440  
441  
442  
443  
444  
445  
446  
447  
448  
449  
450  
451  
452  
453  
454  
455  
456  
457  
458  
459  
460  
461  
462  
463  
464  
465  
466  
467  
468  
469  
470  
471  
472  
473  
474  
475  
476  
477  
478  
479  
480  
481  
482  
483  
484  
485  
486  
487  
488  
489  
490  
491  
492  
493  
494  
495  
496  
497  
498  
499  
500  
501  
502  
503  
504  
505  
506  
507  
508  
509  
510  
511  
512  
513  
514  
515  
516  
517  
518  
519  
520  
521  
522  
523  
524  
525  
526  
527  
528  
529  
530  
531  
532  
533  
534  
535  
536  
537  
538  
539  
540  
541  
542  
543  
544  
545  
546  
547  
548  
549  
550  
551  
552  
553  
554  
555  
556  
557  
558  
559  
560  
561  
562  
563  
564  
565  
566  
567  
568  
569  
570  
571  
572  
573  
574  
575  
576  
577  
578  
579  
580  
581  
582  
583  
584  
585  
586  
587  
588  
589  
590  
591  
592  
593  
594  
595  
596  
597  
598  
599  
600  
601  
602  
603  
604  
605  
606  
607  
608  
609  
610  
611  
612  
613  
614  
615  
616  
617  
618  
619  
620  
621  
622  
623  
624  
625  
626  
627  
628  
629  
630  
631  
632  
633  
634  
635  
636  
637  
638  
639  
640  
641  
642  
643  
644  
645  
646  
647  
648  
649  
650  
651  
652  
653  
654  
655  
656  
657  
658  
659  
660  
661  
662  
663  
664  
665  
666  
667  
668  
669  
670  
671  
672  
673  
674  
675  
676  
677  
678  
679  
680  
681  
682  
683  
684  
685  
686  
687  
688  
689  
690  
691  
692  
693  
694  
695  
696  
697  
698  
699  
700  
701  
702  
703  
704  
705  
706  
707  
708  
709  
710  
711  
712  
713  
714  
715  
716  
717  
718  
719  
720  
721  
722  
723  
724  
725  
726  
727  
728  
729  
730  
731  
732  
733  
734  
735  
736  
737  
738  
739  
740  
741  
742  
743  
744  
745  
746  
747  
748  
749  
750  
751  
752  
753  
754  
755  
756  
757  
758  
759  
760  
761  
762  
763  
764  
765  
766  
767  
768  
769  
770  
771  
772  
773  
774  
775  
776  
777  
778  
779  
780  
781  
782  
783  
784  
785  
786  
787  
788  
789  
790  
791  
792  
793  
794  
795  
796  
797  
798  
799  
800  
801  
802  
803  
804  
805  
806  
807  
808  
809  
810  
811  
812  
813  
814  
815  
816  
817  
818  
819  
820  
821  
822  
823  
824  
825  
826  
827  
828  
829  
830  
831  
832  
833  
834  
835  
836  
837  
838  
839  
840  
841  
842  
843  
844  
845  
846  
847  
848  
849  
850  
851  
852  
853  
854  
855  
856  
857  
858  
859  
860  
861  
862  
863  
864  
865  
866  
867  
868  
869  
870  
871  
872  
873  
874  
875  
876  
877  
878  
879  
880  
881  
882  
883  
884  
885  
886  
887  
888  
889  
890  
891  
892  
893  
894  
895  
896  
897  
898  
899  
900  
901  
902  
903  
904  
905  
906  
907  
908  
909  
910  
911  
912  
913  
914  
915  
916  
917  
918  
919  
920  
921  
922  
923  
924  
925  
926  
927  
928  
929  
930  
931  
932  
933  
934  
935  
936  
937  
938  
939  
940  
941  
942  
943  
944  
945  
946  
947  
948  
949  
950  
951  
952  
953  
954  
955  
956  
957  
958  
959  
960  
961  
962  
963  
964  
965  
966  
967  
968  
969  
970  
971  
972  
973  
974  
975  
976  
977  
978  
979  
980  
981  
982  
983  
984  
985  
986  
987  
988  
989  
990  
991  
992  
993  
994  
995  
996  
997  
998  
999  
1000

The objective of this study is to explore the public health impact of introducing the RZV vaccine in the UK in the routine population 70 YOA. The effect of RZV and ZVL on HZ and PHN incidence, complications and health resource utilisation is compared to no vaccination. Different scenario analyses are carried out to assess the impact of first-dose RZV coverage and second-dose RZV compliance and to determine the optimal age for vaccination.



## **METHODS**

### *PATIENT AND PUBLIC INVOLVEMENT*

Patients or public were not involved as the analysis is based on mathematical modeling.

### *MODEL STRUCTURE*

The ZOster ecoNomic Analysis (ZONA), a static multi-cohort Markov model previously developed using Microsoft Excel, was adapted to the UK setting. The economic model considers up to five various age cohorts that can transition between different health states, including no HZ, HZ, health states associated with complications of HZ (PHN and non-PHN complications) and death from HZ or natural causes.<sup>25</sup> Cycle length is set to one year and follows all subjects from the year of intervention over their remaining life-time. The model has three different arms, having the same yearly model structure: No vaccination, vaccination with RZV and vaccination with ZVL. Within the vaccine strategy, individuals can be fully compliant with the vaccine dosing schedule, only partially or not vaccinated at all (depending on the compliance rate). Further details regarding the model structure are reported in Curran et al, 2017.<sup>25</sup>

### *MODEL INPUT PARAMETERS*

Wherever possible, UK-specific data were used. Efficacy data for RZV and ZVL were derived from pivotal clinical trials conducted for ZVL and RZV.<sup>16 23 24 26</sup> Both model structure and global inputs such as VE and waning were validated with an external expert panel (epidemiologists, clinicians and health economists with a background in HZ) in September 2016.

### *DEMOGRAPHICS*

Populations in the model are projected to 2018 values. The base-case population consisted of the routine vaccination cohort 70 YOA. Based on projections by the Office of National Statistics (ONS)<sup>27</sup>, the predicted population numbers in the routine cohort of 70 YOA is 722,616, in 2018. Different age cohorts were modelled for use in scenario analyses (Table 1).

All-cause mortality rates were derived from ONS data projected to the year 2018/2019 (Supplementary information [SI] Table 1).<sup>27</sup>

## *EPIDEMIOLOGY*

### *HZ INCIDENCE*

HZ incidence was derived from a recent UK Clinical Practice Research Datalink (CPRD) study, which assessed the incidence of HZ in immunocompetent (IC-free) and IC individuals between 2000 and 2012<sup>28</sup> (SI Table 2). The CPRD database study presents the most recent real-world data on HZ incidence and was therefore considered the most appropriate source for this parameter. The IC-free and IC population were matched by age, gender and location of general practitioner (GP) and the proportion of IC individuals was adjusted in the whole population to account for an increase in immunodeficiencies in older individuals. In the age-group 70-79 YOA, 35% of individuals had primary or acquired immunodeficiency and a subgroup of this IC population is contraindicated to receive ZVL. Incidence numbers were converted to annual probabilities of developing HZ (Table 1). Lower and upper ranges of probabilities for HZ incidence in the whole population were obtained from published data since it was not possible to derive it from the split IC and IC-free data set analysed in the CPRD study<sup>3</sup> (SI Table 3).

Incidence rate of recurrent HZ is assumed to be the same as the incidence of the initial event. This assumption is supported by published data which indicates that the incidence rates of initial and recurrent HZ events are similar.<sup>29 30</sup>

### *PHN PROBABILITY*

PHN is defined as pain appearing or persisting for more than 3 months after initiation of HZ. PHN incidence was derived from published data.<sup>8 31</sup> Gauthier et al. derived PHN incidence from the CPRD in the population excluding patients with underlying IC conditions using prescription medication records on top of PHN codes to identify these episodes. Forbes et al reported odds ratios of developing PHN for people with human immunodeficiency virus and hematopoietic stem cell transplantation compared to IC-free population and these data were used in combination with data reported by Gauthier et al. to model the proportion of PHN cases following an episode of HZ in the general population (Table 1, SI Table 4). As for HZ, the model assumes that the incidence of recurrent PHN is the same as for first-time PHN.

### *HZ-RELATED MORTALITY*

Values for HZ-associated mortality are based on published literature<sup>32</sup> (SI Table 5). The

1  
2  
3  
4 study by Edmunds et al. was the only report including a granular breakdown of HZ  
5 case fatality rate by age-group in the UK and was therefore considered to be the most  
6 appropriate source for HZ-associated mortality. The published data are based on the  
7 population of England and Wales. However, increasing mortality with increasing age  
8 is consistent with observations from studies conducted in other countries<sup>33</sup> and it is  
9 assumed that these rates apply to the entire UK population.  
10  
11  
12

### 13 *NON-PHN COMPLICATIONS*

14  
15  
16 A wide range of complications other than PHN can occur in people experiencing an  
17 episode of HZ and could have a substantial impact on the burden of the disease. In the  
18 model, four main categories of complications were included, i.e., ocular, neurological,  
19 cutaneous and other non-pain complications. Probabilities of developing these  
20 complications after the initial HZ episodes were taken from published literature<sup>29</sup>  
21 (Table 1).  
22  
23  
24

### 25 *HOSPITALISATION AND GP VISITS DUE TO COMPLICATIONS*

26  
27  
28 The CPRD study was used to derive the proportion of patients being hospitalised or  
29 visiting their GP due to HZ-related complications.<sup>28</sup> Hospitalisation rates were higher  
30 in the IC cohort for all age-groups. In addition, health-care resource use was higher in  
31 older adults (SI Tables 6 & 7).  
32  
33  
34

### 35 *VACCINE EFFICACY AND SAFETY*

#### 36 *EFFICACY*

37  
38  
39 Vaccine efficacy against HZ and PHN ( $VE_{HZ}$  and  $VE_{PHN}$ , respectively) were derived from  
40 the SPS trial and the Zoster Efficacy and Safety Study (ZEST) for ZVL and from the  
41 ZOE-50 and ZOE-70 trials for RZV<sup>16 23 24 26</sup> (Table 1, SI Table 8). VE for RZV is based on a  
42 2-dose schedule given 2 months apart. However, compliance with 2<sup>nd</sup> dose RZV is likely  
43 to be lower than 100%, as such there is a cohort of individuals who are only vaccinated  
44 with one dose. Therefore, efficacy data for 1-dose RZV were analysed post-hoc based  
45 on limited clinical data from individuals in the ZOE trials receiving only 1-dose RZV.<sup>25</sup>  
46  
47  
48  
49  
50  
51

52  
53 Waning for both vaccines was modelled by linear fitting, using data from the above-  
54 mentioned trials as well as from the long-term persistence study (LTPS) for ZVL.<sup>25</sup> For  
55 RZV, waning rates were assumed to be 1% (range: 0%, 2.6%) during the first 4 years  
56 after vaccination and 2.3% (range: 0.7%, 4.6%) thereafter in individuals < 70 YOA. In  
57  
58  
59  
60

1  
2  
3  
4 the population  $\geq 70$  YOA, waning rate was assumed to be constant over time at 3.6%  
5 (range: 1.4%, 6.6%).<sup>25</sup> For ZVL, the model indicated a waning rate of 5.4% (range: 4.5%,  
6 6.4%) during the first 4 years after vaccination and 5.1% (range: 4.1%, 6.0%) thereafter  
7 in all age-groups<sup>17 25</sup> (SI Table 9).  
8  
9

## 10 *COVERAGE AND COMPLIANCE*

11  
12  
13 In the base-case analysis, coverage is set at 48.3% in line with latest coverage numbers  
14 for the UK.<sup>20</sup> The impact of different coverage rates was assessed in sensitivity  
15 analyses. Compliance with the second-dose of RZV was set to 70%.  
16  
17

## 18 *OUTCOMES*

19  
20  
21 The model was used to estimate the avoidance of HZ and PHN cases, complications,  
22 deaths, GP visits and hospitalisations cases, complications due to HZ, HZ-related  
23 deaths and number of GP visits and hospitalisations for three different vaccination  
24 strategies, i.e., vaccination with RZV, vaccination with ZVL and no vaccination.  
25  
26

27  
28 The number needed to vaccinate (NNV) to avert one case of HZ and PHN was also  
29 evaluated by applying the following calculation:  
30  
31

$$32 \quad NNV = \frac{1}{\left( \frac{\text{control cases}}{\text{vaccinated persons}} \right) - \left( \frac{\text{vaccinated cases}}{\text{vaccinated persons}} \right)}$$

## 33 *SCENARIO ANALYSES*

34  
35  
36 Different scenario analyses were carried out where assumptions regarding vaccination  
37 coverage and compliance and age at vaccination were changed.  
38  
39

40  
41 In a first scenario analysis, the impact of increasing coverage of RZV to 70% was  
42 explored. A higher coverage of 70% in the UK was deemed plausible considering that  
43 a) the influenza vaccine uptake in people  $\geq 65$  YOA was 70.5% in 2016/2017<sup>34</sup> and b)  
44 in the absence of a contraindication, vaccinators might not hesitate to administer the  
45 vaccine in IC individuals.  
46  
47

48  
49 In a second scenario analysis, the second-dose compliance was varied, assuming a  
50 lower limit of 60% and an upper limit of 89% reflecting the lowest 10<sup>th</sup> percentile of  
51 the clinical trial second-dose compliance.<sup>25</sup>  
52  
53  
54  
55  
56  
57  
58  
59  
60

1  
2  
3  
4 Finally, the impact of changing the vaccination age on health outcomes was explored.  
5 VE is in general higher in younger individuals favouring early vaccination. On the other  
6 hand, duration of protection decreases over time and burden of disease (severity and  
7 duration of HZ and PHN) is higher in older individuals, favouring vaccination at an older  
8 age.<sup>35</sup> The relative balance of these factors may be different in case of ZVL and RZV,  
9 leading to different conclusions regarding optimal vaccination age.  
10  
11  
12

### 13 *SENSITIVITY ANALYSES*

14  
15  
16 Deterministic sensitivity analyses (DSA) were conducted to test the robustness of the  
17 results subject to changes in input parameters. To this aim, HZ and PHN incidence  
18 rates, VE and waning rates for both vaccines, incidence rate of HZ-related  
19 complications and vaccine-related adverse events, coverage and second-dose  
20 compliance were varied in one-way sensitivity analyses according to pre-defined  
21 ranges. Tornado diagrams were used to illustrate parameters that had the largest  
22 impact on HZ cases avoided.  
23  
24  
25  
26

27  
28 Probabilistic sensitivity analysis (PSA) was carried out to assess the variability of results  
29 when changing parameters concomitantly using Monte Carlo simulation (5,000  
30 simulations). Each parameter could be attributed a value within its predefined range  
31 and according to the assigned probability distribution. A beta-distribution was used  
32 for all parameters except for vaccine coverage which followed a uniform distribution.  
33 Age-specific incidence parameters which varied across age-groups were assumed to  
34 be correlated using a correlation of 0.5. The results of the PSA are presented using a  
35 histogram displaying the HZ cases avoided with RZV compared with ZVL.  
36  
37  
38  
39  
40

## 41 *RESULTS*

### 42 *BASE-CASE ANALYSIS*

43  
44 In the base-case scenario (cohort 70 YOA) RZV reduced the number of HZ and PHN  
45 cases by 30,262 and 5,409, respectively, compared to no vaccination. ZVL led to a  
46 reduction of 7,909 HZ and 3,567 PHN cases (Table 2). Vaccination with RZV reduced  
47 the number of HZ-related complications and the health-resource use (Table 2). There  
48 were few HZ-related deaths; compared to no vaccination, RZV prevented 8 HZ-related  
49 deaths while ZVL prevented none. The NNV to prevent one case of HZ was 12 with RZV  
50 and 45 with ZVL. The NNV to avoid one case of PHN was 65 with RZV and 98 with ZVL,  
51 respectively.  
52  
53  
54  
55  
56  
57  
58  
59  
60

### SCENARIO ANALYSES

In a first scenario analysis, we increased coverage from 48.3% to 70% for RZV. In this scenario, an additional 13,596 HZ and 2,430 PHN cases would be prevented in the routine vaccination cohort (70 YOA) (Figure 1, light blue bar showing the additional proportion of HZ and PHN cases avoided with RZV compared to no vaccination).

In a second scenario analysis, compliance with second-dose of RZV was set to lower and upper limits of 60% and 89%. Compared to no vaccination, the numbers of HZ cases avoided with RZV were 28,145 and 34,284 at the lower and upper limits for compliance, respectively (Figure 2).

To determine the optimal age for vaccination, scenario analyses were carried out to evaluate the public health impact in different age cohorts (50, 60, 65, 70 and 80 YOA) in terms of NNV, HZ and PHN cases avoided and resource utilisation per 100,000 people.

In case of RZV, the scenario that led to avoidance of the most HZ cases per 100,000 people would be vaccinating at 60 YOA, while slightly more PHN cases per 100,000 people could be avoided by vaccinating at 65 YOA. In case of ZVL, the number of HZ cases avoided per 100,000 people would be highest in the 65 YOA cohort, but more PHN cases per 100,000 people would be avoided in the 70 YOA cohort (Figure 3). In all age-groups, number of HZ and PHN cases avoided per 100,000 people was higher for RZV compared to ZVL. Complications avoided ranged from 689 with RZV and 250 with ZVL in the 65 YOA cohort, to 434 with RZV and 46 with ZVL in the 80 YOA cohort.

Consistent with these results, for RZV, the NNV to avoid one case of HZ was lowest in the 60 YOA (NNV = 9) and the NNV to avoid one case of PHN was lowest in the 65 YOA cohort (NNV = 54) (Table 3).

The higher number of HZ and PHN cases avoided with RZV compared to ZVL across all age cohorts leads to an important reduction in the use of health care resources, which might be an indicator of a reduction in direct costs due to HZ (Table 4). The number of GP visits per 100,000 people avoided is highest for the 60 YOA and 65 YOA cohorts for both vaccines, and consistently higher for RZV compared to ZVL. The number of hospitalisations avoided increases with increasing age for RZV, reflecting the increased risk of hospitalisation due to HZ in older individuals.

## SENSITIVITY ANALYSES

In DSA analyses carried out for the base-case scenario in the age-cohort 70 YOA, the robustness of results was tested by changing input parameters to their lower and upper estimated confidence ranges (SI Tables 3 – 5; SI Tables 8 – 9). In the base case analyses, RZV prevented an additional 22,353 HZ cases as compared to ZVL. The parameter with the highest impact on the relative advantage of RZV over ZVL was annual waning of RZV (2 doses)  $VE_{HZ}$  in people  $\geq 70$  YOA, although the highest waning for RZV would still lead to a reduction of over 13,000 HZ cases compared to ZVL. Other parameters influencing the number of HZ cases avoided include initial  $VE_{HZ}$  in people  $\geq 70$  YOA for ZVL and RZV single dose, HZ incidence, and RZV compliance to second-dose (Figure 4).

During PSA, all parameters were varied simultaneously along their predefined ranges. In all simulations ( $n = 5,000$ ), RZV led to a reduction of HZ cases as compared to ZVL. The distribution of the number of HZ cases avoided by RZV relative to ZVL is shown in Figure 5. Overall, 83.1% of simulations predicted that RZV would prevent at least 15,000 additional HZ cases compared with ZVL in the age-group 70 YOA.

## DISCUSSION

UMV against HZ using ZVL was introduced in the UK in 2013 and observational studies suggest that the programme has brought down HZ incidence by approximately one third in the vaccinated cohorts.<sup>36 37</sup> RZV has been approved by the EMA in individuals  $\geq 50$  YOA, thereby offering an alternative option to vaccinate people against HZ in addition to the existing ZVL. The aim of this study was to evaluate the public health impact of RZV in terms of HZ prevention compared to ZVL or no vaccination in the UK setting.

In the base-case considering the current vaccination cohort of people 70 YOA, RZV reduced the number of HZ and PHN cases by 30,262 and 5,409 compared to no vaccination. In comparison, ZVL prevented 7,909 HZ and 3,567 PHN cases as compared to no vaccination. NNV to prevent one episode of HZ was almost four times lower with RZV compared to ZVL, i.e., 12 with RZV vs 45 with ZVL. In addition, the estimated number of hospitalisations and GP visits due to HZ and PHN were substantially lower with RZV compared with ZVL. HZ-related mortality is in general low; nevertheless, our simulations predicted that 8 deaths could be prevented with an RZV vaccination strategy while no HZ-related deaths were prevented adopting a ZVL vaccination

1  
2  
3  
4 strategy.

5  
6 Results were robust under deterministic and probabilistic sensitivity analyses. Annual  
7 waning of RZV VE in people  $\geq 70$  YOA had the greatest impact on the number of HZ  
8 avoided relative to ZVL, but even assuming an extreme assumption on waning, with  
9 an annual waning rate of 6.6%, RZV would prevent an additional 13,816 HZ cases as  
10 compared to ZVL. Other parameters to which the relative vaccination strategies  
11 proved sensitive included annual HZ incidence and  $VE_{HZ}$  of RZV and ZVL. Probabilistic  
12 sensitivity analyses were always in favour of the RZV vaccination strategy with 83.1%  
13 of simulations showing a reduction of at least  $\geq 15,000$  HZ cases with respect to ZVL.  
14 We also tested different scenarios in which coverage and compliance were varied,  
15 assuming that the public health impact would increase as a greater proportion of  
16 individuals would be vaccinated. Increasing the coverage estimate of the first-dose of  
17 RZV from 48.3% to 70% would further reduce HZ and PHN incidence thereby leading  
18 to a greater reduction in healthcare resources used. We hypothesise that the coverage  
19 with RZV might be higher because a proportion of the eligible individuals are currently  
20 not receiving the vaccine with ZVL. Even though the proportion of individuals with a  
21 true contraindication to ZVL is estimated to be small (2.8%<sup>20</sup>) HZ vaccination with ZVL  
22 might be withheld even in those IC individuals who have no contraindications as  
23 vaccinators may have been risk averse. Reducing RZV compliance to 60%, RZV would  
24 still prevent approximately three times more HZ cases compared to ZVL. This is in line  
25 with a recent public health impact study carried out for the German setting where a  
26 compliance rate of 50% would still lead to an improvement of 200% over ZVL in terms  
27 of HZ prevention.<sup>25</sup> Although results are in line with the German study, this UK model  
28 adaptation has some different methodological considerations that are of importance  
29 to potential decision-making bodies. Firstly, this manuscript also assesses single year  
30 cohorts versus multiple year cohorts. This was chosen to reflect the current HZ  
31 vaccination programme in the UK where people get vaccinated with ZVL at 70 YOA  
32 and 79 YOA within the catch-up programme. Secondly, the HZ incidence is calculated  
33 based upon a weighting method of IC-free and IC populations using the prevalence of  
34 IC in the different age groups. This is important to estimate the actual HZ incidence in  
35 the general population.  
36  
37  
38  
39  
40  
41  
42  
43  
44  
45  
46  
47  
48  
49  
50

51  
52 The recommended vaccination strategy was based on the clinical profile of ZVL, the  
53 only vaccine available at the time. In its recommendation, the JCVI noted that ZVL VE  
54 decreases with increasing age and over time; hence, the current age cohort eligible  
55 for vaccination, i.e., individuals 70 YOA, is a compromise to optimise limited efficacy  
56  
57  
58  
59  
60



1  
2  
3  
4 and duration of protection against HZ. The JCVI also stated that optimal age at  
5 vaccination would depend on the characteristics of any given vaccine.<sup>38</sup> Therefore, the  
6 impact of vaccination age on HZ and PHN incidence was explored through scenario  
7 analyses including different age-cohorts (50, 60, 65, 70 and 80 YOA). The number of  
8 HZ and PHN cases avoided per 100,000 people was higher with RZV than with ZVL  
9 across all age cohorts. In case of RZV, most HZ cases were avoided in the 60 YOA  
10 cohort, while PHN case avoidance was highest in the 65 YOA cohort. This observation  
11 is consistent with a higher probability of developing PHN at an increased age. On the  
12 other hand, the projected number of PHN cases avoided with ZVL was highest in the  
13 70 YOA. This finding is due to a top-up efficacy seen with ZVL against PHN in the  
14 population  $\geq 70$  YOA: vaccinated individuals with breakthrough HZ are at a lower risk  
15 of developing PHN as compared to unvaccinated individuals with HZ. In the individuals  
16  $< 70$  YOA, no additional protection against PHN was observed in clinical studies with  
17 ZVL. For RZV no additional top-up efficacy could be calculated based on the limited  
18 number of breakthrough cases, and thus  $VE_{HZ}$  and  $VE_{PHN}$  were assumed to be the  
19 same. As a result, for RZV, the NNV to avoid one case of HZ and PHN was lowest for  
20 the 60 YOA and 65 YOA cohorts. NNV increased in the 70 YOA and more so in the 80  
21 YOA, where a proportion of the simulated cohort died due to natural causes before  
22 any health benefit of vaccination occurred.

23  
24  
25  
26  
27  
28  
29  
30  
31  
32  
33 From a health care utilisation perspective, RZV reduced the number of GP visits by  
34 more than 13,000 compared to ZVL in all age-groups. The highest reduction in GP visits  
35 was predicted in the 65 YOA cohort, while the largest impact on hospitalisations was  
36 predicted for the 80 YOA cohort. The latter might be explained by the higher risk of  
37 hospitalisation inherent to older individuals due to a higher degree of frailty.  
38 Nevertheless, it should be noted that the reduction in hospitalisations was predicted  
39 to be several-fold higher with RZV compared to ZVL in all age-cohorts. Reduction in  
40 the use of health care resources is a good indicator of potential decrease in direct  
41 costs of new health care interventions; however, this requires further investigation in  
42 a cost-effectiveness analysis with RZV in the UK context.

43  
44  
45  
46  
47  
48  
49 The potential public health impact of RZV in the UK setting has previously been studied  
50 by our group.<sup>39</sup> The study showed a substantial reduction in HZ and PHN cases  
51 compared to no vaccination; however, no comparison was made to ZVL. A number of  
52 studies have evaluated the impact of ZVL on disease burden and associated cost-  
53 effectiveness in the UK setting. Van Hoek et al. analysed cost-effectiveness of ZVL in  
54 different age-groups with the base-case considering a cohort of immunocompetent  
55  
56  
57  
58  
59  
60

1  
2  
3  
4 65-year-old individuals in the UK. This cohort was modelled over a life-time and a  
5 vaccine coverage of 73.5%.<sup>3</sup> Waning rates might have been underestimated in this  
6 model since long-term data from the LTPS study for persistence of efficacy of the ZVL  
7 vaccination were not yet taken into account.<sup>25</sup> The LTPS study showed that  $VE_{HZ}$  of ZVL  
8 decreases significantly over time with no statistically significant protection observed  
9 after 8 years of vaccination.<sup>17 18</sup> In the economic model published by Moore et al., the  
10 NNV of ZVL to prevent one case of HZ was 15, and hence lower than that found in our  
11 simulations. However, the authors assumed a waning rate of 0%.<sup>10</sup>  
12  
13  
14  
15

16 The public health impact of RZV was also evaluated for other settings, including  
17 Germany, US, Canada and Australia. These studies used a wide range of assumptions  
18 regarding coverage, compliance and duration of vaccine protection for both RZV and  
19 ZVL.<sup>28 40-42</sup> Despite differences in these assumptions, all studies showed a consistent  
20 improvement in the reduction of HZ cases and its complications compared to no  
21 vaccination or vaccination with ZVL. In a recent independent cost-effectiveness study  
22 for the US setting, employing conservative assumptions regarding RZV waning rate,  
23 coverage and compliance, the authors concluded that RZV was more effective  
24 compared to ZVL under the vast majority of assumptions evaluated.<sup>40</sup>  
25  
26  
27  
28  
29  
30

31 As with every model, there are strengths and limitations associated with the modelling  
32 strategy employed. For RZV, most recent UK-specific data available at the time we  
33 conducted this study were used; for HZ incidence the CPRD database, a large UK-  
34 specific database, was analysed and values for both IC and non-IC cohorts were  
35 combined.<sup>28 43</sup> For PHN incidence, published data from two reports were used to  
36 estimate the PHN probability in the total population including individuals with  
37 immunodeficient states. The estimates of PHN cases prevented are close to real  
38 values, validating our approach. Demographic data projected to the year 2018 were  
39 used based on numbers reported by the ONS.<sup>27</sup> The limitations in this study are related  
40 to assumptions that had to be made in the absence of real-world data, including  
41 coverage with RZV, compliance and long-term waning for RZV. Coverage and  
42 compliance were set to values observed in comparable vaccination programs and  
43 these parameters were varied in scenario and one-way sensitivity analyses. Results  
44 from long-term studies with RZV are still outstanding and follow-up data is currently  
45 limited to 4 years. However, the model has been developed such that it can be  
46 updated once additional data becomes available. For ZVL waning rates, we included  
47 both data from the SPS and the LTPS study<sup>25</sup> to ensure that we could compare ZVL  
48 and RZV in the ZONA model. Recent observational studies looking into the vaccine  
49  
50  
51  
52  
53  
54  
55  
56  
57  
58  
59  
60

1  
2  
3  
4 effectiveness of ZVL show that the vaccine wanes rapidly and has little to no protection  
5 left beyond year 8 after vaccination.<sup>18 37</sup> Finally, the rate of HZ-associated  
6 complications was assumed to be the same in all individuals with HZ regardless of their  
7 vaccination status. This assumption ignores the potential benefit vaccination might  
8 have by lowering the severity and duration of break-through HZ cases. Clinical trial  
9 data suggest that  $VE_{HZ}$  and  $VE_{PHN}$  are similar and there is some evidence that duration  
10 and severity of HZ/PHN pain is lower in individuals having received RZV as compared  
11 to unvaccinated individuals.<sup>44</sup>  
12  
13  
14  
15

16 Future research might be directed towards assessing severity and duration of HZ and  
17 PHN cases depending on vaccination status, identifying subgroups of the population  
18 that may have enhanced benefit from the vaccine and evaluating cost-effectiveness  
19 in the current UMV cohort and across different age-cohorts.  
20  
21  
22

23 A lay language summary contextualizing the outcomes and potential impact of this  
24 study for healthcare providers is displayed in Figure 6.  
25  
26  
27  
28  
29

## 30 **CONCLUSION**

31  
32  
33 Within the model assumptions, RZV has the greater public health impact in terms of  
34 HZ and PHN case avoidance and reduction in health care utilisation. When the UMV  
35 was introduced in 2013, vaccinating people at 70 YOA was the best option based on  
36 the vaccine characteristics of ZVL. With the approval of RZV in the US, Canada, Japan  
37 and Europe in adults  $\geq 50$  YOA the optimal HZ prevention strategy needs to be re-  
38 evaluated. The model projects for RZV a longer duration of protection and the VE  
39 remains high in older age groups compared to ZVL. Therefore, the results of this model  
40 show that the difference in clinical profile of RZV leads to a different optimal age of  
41 vaccination. Vaccinating the UK population with RZV at 60 YOA or 65 YOA is the  
42 optimal vaccination strategy in terms of public health impact, while being superior to  
43 ZVL in all age cohorts studied.  
44  
45  
46  
47  
48  
49  
50

## 51 **ACKNOWLEDGEMENTS**

52  
53  
54 Authors would like to Lijoy Varghese for this contribution to the study. They also want  
55 to thank Business & Decision Life Sciences platform for editorial assistance and  
56 publications coordination, on behalf of GSK. Stephanie Garcia coordinated manuscript  
57  
58  
59  
60

1  
2  
3  
4  
5  
6  
7  
8  
9  
10  
11  
12  
13  
14  
15  
16  
17  
18  
19  
20  
21  
22  
23  
24  
25  
26  
27  
28  
29  
30  
31  
32  
33  
34  
35  
36  
37  
38  
39  
40  
41  
42  
43  
44  
45  
46  
47  
48  
49  
50  
51  
52  
53  
54  
55  
56  
57  
58  
59  
60

development and editorial support. Katrin Spiegel provided writing support.

## REFERENCES

1. Mueller NH, Gilden DH, Cohrs RJ, et al. Varicella zoster virus infection: clinical features, molecular pathogenesis of disease, and latency. *Neurol Clin* 2008;**26**(3):675-97. doi:10.1016/j.ncl.2008.03.011.
2. Kawai K, Gebremeskel BG, Acosta CJ. Systematic review of incidence and complications of herpes zoster: Towards a global perspective. *BMJ Open* 2014;**4**:e004833. doi:10.1136/bmjopen-2014-004833
3. van Hoek AJ, Gay N, Melegaro A, et al. Estimating the cost-effectiveness of vaccination against herpes zoster in England and Wales. *Vaccine* 2009;**27**(9):1454-67. doi:10.1016/j.vaccine.2008.12.024
4. Johnson RW, Alvarez-Pasquin M-J, Bijl M, et al. Herpes zoster epidemiology, management, and disease and economic burden in Europe: a multidisciplinary perspective. *Therapeutic Advances in Vaccines* 2015;**3**(4):109-20. doi:10.1177/2051013615599151
5. Bollaerts K, Riera-Montes M, Heininger U, et al. A systematic review of varicella seroprevalence in European countries before universal childhood immunization: deriving incidence from seroprevalence data. *Epidemiol Infect* 2017;**145**(13):2666-77. doi:10.1017/S0950268817001546
6. Brisson M, Edmunds WJ, Law B, et al. Epidemiology of varicella zoster virus infection in Canada and the United Kingdom. *Epidemiol Infect* 2001;**127**:305-14. doi:10.1017/S0950268801005921
7. Pinchinat S, Cebrián-Cuenca AM, Bricout H, et al. Similar herpes zoster incidence across Europe: Results from a systematic literature review. *BMC Infect Dis* 2013;**13**:170. doi:10.1186/1471-2334-13-170
8. Gauthier A, Breuer J, Carrington D, et al. Epidemiology and cost of herpes zoster and post-herpetic neuralgia in the United Kingdom. *Epidemiol Infect* 2009;**137**(1):38-47. doi:10.1017/S0950268808000678
9. Varghese L, Standaert B, Olivieri A, et al. The temporal impact of aging on the burden of herpes zoster. *BMC Geriatr* 2017;**17**:30. doi:10.1186/s12877-017-0420-9
10. Moore L, Remy V, Martin M, et al. A health economic model for evaluating a vaccine for the prevention of herpes zoster and post-herpetic neuralgia in the UK. *Cost effectiveness and resource allocation : C/E* 2010;**8**:7-7. doi:10.1186/1478-7547-8-7
11. Gater A, Abetz-Webb L, Carroll S, et al. Burden of herpes zoster in the UK: Findings from the zoster quality of life (ZQOL) study. *BMC Infect Dis* 2014;**14**:402. doi:10.1186/1471-2334-14-402
12. Drolet M, Brisson M, Schmader KE, et al. The impact of herpes zoster and postherpetic neuralgia on health-related quality of life: A prospective study. *CMAJ* 2010;**182**(16):1731-36. doi:10.1503/cmaj.091711
13. Schmader KE, Sloane R, Pieper C, et al. The impact of acute herpes zoster pain and discomfort on functional status and quality of life in older adults. *The Clinical journal of pain* 2007;**23**(6):490-6. doi:10.1097/AJP.0b013e318065b6c9
14. Joint Committee on Vaccination and Immunisation. Joint Committee on Vaccination and Immunisation Statement on varicella and herpes zoster vaccines. available from: <http://webarchive.nationalarchives.gov.uk/20120907151317/http://www.dh.gov>

- v.uk/prod\_consum\_dh/groups/dh\_digitalassets/@dh/@ab/documents/digitalasset/dh\_133599.pdf [accessed June 26, 2018].
15. Merck Sharp Dohme Ltd. Zostavax Summary of Product Characteristics (SmPC). available from: <https://www.medicines.org.uk/emc/product/6101/smcp> [accessed June 26, 2018].
  16. Oxman MN, Levin MJ, Johnson GR, et al. A vaccine to prevent herpes zoster and postherpetic neuralgia in older adults. *NEnglJMed* 2012;**366**(20):1859-69. doi:10.1056/NEJMoA1208410
  17. Morrison VA, Johnson GR, Schmader KE, et al. Long-term persistence of zoster vaccine efficacy. *Clin Infect Dis* 2015;**60**(6):900-09. doi:10.1093/cid/ciu918
  18. Tseng HF, Harpaz R, Luo Y, et al. Declining Effectiveness of Herpes Zoster Vaccine in Adults Aged  $\geq 60$  Years. *J Infect Dis* 2016;**213**(12):1872-75. doi:10.1093/infdis/jiw047
  19. Public Health England. Shingles (herpes zoster), 2016:Chapter 28a.
  20. Public Health England. Herpes zoster ( shingles ) immunisation programme : September 2016 to August 2017 Report for England. available from: [https://assets.publishing.service.gov.uk/government/uploads/system/uploads/attachment\\_data/file/667636/Annual\\_shingles\\_report\\_2016-2017\\_.pdf](https://assets.publishing.service.gov.uk/government/uploads/system/uploads/attachment_data/file/667636/Annual_shingles_report_2016-2017_.pdf) [accessed June 26, 2018].
  21. Chlibek R, Pauksens K, Rombo L, et al. Long-term immunogenicity and safety of an investigational herpes zoster subunit vaccine in older adults. *Vaccine* 2016;**34**(6):863-68. doi:10.1016/j.vaccine.2015.09.073
  22. GlaxoSmithKline Biologicals SA. Shingrix Summary of Product Characteristics (SmPC). available from: [http://www.ema.europa.eu/docs/en\\_GB/document\\_library/EPAR\\_-\\_Product\\_Information/human/004336/WC500246550.pdf](http://www.ema.europa.eu/docs/en_GB/document_library/EPAR_-_Product_Information/human/004336/WC500246550.pdf) [accessed June 26, 2018].
  23. Lal H, Cunningham AL, Godeaux O, et al. Efficacy of an Adjuvanted Herpes Zoster Subunit Vaccine in Older Adults. *N Engl J Med* 2015;**372**(22):2087-96. doi:10.1056/NEJMoA1501184
  24. Cunningham AL, Lal H, Kovac M, et al. Efficacy of the Herpes Zoster Subunit Vaccine in Adults 70 Years of Age or Older. *N Engl J Med* 2016;**375**(11):1019-32. doi:10.1056/NEJMoA1603800
  25. Curran D, Van Oorschot D, Varghese L, et al. Assessment of the potential public health impact of Herpes Zoster vaccination in Germany. *Hum Vaccin Immunother* 2017;**13**(10):2213-21. doi:10.1080/21645515.2017.1345399
  26. Schmader KE, Levin MJ, Gnann JW, et al. Efficacy, safety, and tolerability of herpes zoster vaccine in persons aged 50-59 years. *Clin Infect Dis* 2012;**54**(7):922-28. doi:10.1093/cid/cir970
  27. Office of National Statistics. 2014 based National population projections. available from: <https://www.ons.gov.uk/file?uri=/peoplepopulationandcommunity/populationandmigration/populationprojections/datasets/localauthoritiesinenglandtable2/2014based/table2.xls> [accessed June 13, 2018].
  28. Yanni EA, Ferreira G, Guennec M, et al. Burden of herpes zoster in 16 selected immunocompromised populations in England: a cohort study in the Clinical Practice Research Datalink 2000–2012. *BMJ Open* 2018;**8**(6). doi:10.1136/bmjopen-2017-020528

- 1
  - 2
  - 3
  - 4
  - 5
  - 6
  - 7
  - 8
  - 9
  - 10
  - 11
  - 12
  - 13
  - 14
  - 15
  - 16
  - 17
  - 18
  - 19
  - 20
  - 21
  - 22
  - 23
  - 24
  - 25
  - 26
  - 27
  - 28
  - 29
  - 30
  - 31
  - 32
  - 33
  - 34
  - 35
  - 36
  - 37
  - 38
  - 39
  - 40
  - 41
  - 42
  - 43
  - 44
  - 45
  - 46
  - 47
  - 48
  - 49
  - 50
  - 51
  - 52
  - 53
  - 54
  - 55
  - 56
  - 57
  - 58
  - 59
  - 60
29. Yawn BP, Saddier P, Wollan PC, et al. A population-based study of the incidence and complication rates of herpes zoster before zoster vaccine introduction. *Mayo Clin Proc* 2007;**82**(11):1341-9.
30. Yawn BP, Wollan PC, Kurland MJ, et al. Herpes Zoster Recurrences More Frequent Than Previously Reported. *Mayo Clin Proc* 2011;**86**(2):88-93. doi:10.4065/mcp.2010.0618
31. Forbes HJ, Thomas SL, Smeeth L, et al. A systematic review and meta-analysis of risk factors for postherpetic neuralgia. *Pain* 2016;**157**(1):30-54. doi:10.1097/j.pain.0000000000000307
32. Edmunds WJ, Brisson M, Rose JD. The epidemiology of herpes zoster and potential cost-effectiveness of vaccination in England and Wales. *Vaccine* 2001;**19**(23-24):3076-90. doi:10.1016/S0264-410X(01)00044-5
33. Bricout H, Haugh M, Olatunde O, et al. Herpes zoster-associated mortality in Europe: A systematic review. *BMC Public Health* 2015;**15**(1):466. doi:10.1186/s12889-015-1753-y
34. Public Health England. Influenza: the green book, chapter 19. available from: [https://assets.publishing.service.gov.uk/government/uploads/system/uploads/attachment\\_data/file/663694/Greenbook\\_chapter\\_19\\_Influenza\\_.pdf](https://assets.publishing.service.gov.uk/government/uploads/system/uploads/attachment_data/file/663694/Greenbook_chapter_19_Influenza_.pdf) [accessed June 29, 2018].
35. Sampathkumar P, Drage LA, Martin DP. Herpes zoster (Shingles) and postherpetic neuralgia. *Mayo Clin Proc* 2009;**84**(3):274-80. doi:10.4065/84.3.274
36. Amirhalingam GA, Nick. Keel, Philip. Mullett, David. Correa, Ana. de Lusignan, Simon. Ramsay, Mary. Evaluation of the effect of the herpes zoster vaccination programme 3 years after its introduction in England: a population-based study. *Lancet Public Health* 2018;**3**:e82-90. doi:10.1016/S2468-2667(17)30234-7
37. Walker JL, Andrews NJ, Amirhalingam G, et al. Effectiveness of herpes zoster vaccination in an older United Kingdom population. *Vaccine* 2018;**36**(17):2371-77. doi:10.1016/j.vaccine.2018.02.021
38. Joint Committee on Vaccination Immunisation. Minute of the meeting on 4 October 2017. available from: [https://www.jostrust.org.uk/sites/default/files/minute\\_2017\\_10\\_draft.pdf](https://www.jostrust.org.uk/sites/default/files/minute_2017_10_draft.pdf) <https://www.bmj.com/content/bmj/345/bmj.e6879.full.pdf> [accessed June 26, 2018].
39. Van Oorschoot D, Hunjan M, Varghese L, et al. The public health perspective of an investigational herpes zoster vaccine in the united kingdom (UK). *Value Health* 2016;**19**(7):A400-A00. doi:10.1016/j.jval.2016.09.309
40. Le P, Rothberg MB. Cost-effectiveness of the adjuvanted herpes zoster subunit vaccine in older adults. *JAMA Internal Medicine* 2018;**178**(2):248-58. doi:10.1001/jamainternmed.2017.7431
41. Varghese L, Curran D, Yan S, et al. Estimating the Potential Public Health Impact of Introducing the HZ/su Vaccine in the US Population Aged  $\geq 50$  Years. *Open Forum Infectious Diseases* 2015;**2**(suppl\_1). doi:10.1093/ofid/ofv133.1477
42. Varghese L, Nissen M, Olivieri A, et al. Public health perspective of phase III results of an investigational Herpes Zoster vaccine. Public Health Association of Australia. *Public Health Association of Australia - Communicable Disease Control Conference*, Brisbane 2015:42. <https://www.phaa.net.au/documents/item/581> (accessed June 26, 2018).
43. Curran D, Hunjan M, El Ghachi A, et al. Herpes Zoster Related Healthcare Burden And Costs In Both Immunocompromised (IC) And IC-Free Populations In The

- 1  
2  
3 United Kingdom. *Value Health* 2017;**20**(9):A786.  
4 doi:10.1016/j.jval.2017.08.2296  
5  
6 44. Curran D, Athan E, Diez-Domingo J, et al. Quality-of-Life Impact of an  
7 Investigational Subunit-Adjuvanted Herpes Zoster Vaccine in Adults  $\geq 50$  Years  
8 of Age. *Open Forum Infectious Diseases* 2016;**3**(suppl\_1).  
9 doi:10.1093/ofid/ofw194.77  
10  
11  
12  
13  
14  
15  
16  
17  
18  
19  
20  
21  
22  
23  
24  
25  
26  
27  
28  
29  
30  
31  
32  
33  
34  
35  
36  
37  
38  
39  
40  
41  
42  
43  
44  
45  
46  
47  
48  
49  
50  
51  
52  
53  
54  
55  
56  
57  
58  
59  
60



## ***FOOTNOTES***

### ***TRADEMARK***

Shingrix is a trademark of the GSK group of companies.

Zostavax is a trademark from Merck Sharp & Dohme Corp.

### ***AUTHORS' CONTRIBUTION***

DVO, DC, SL, BB participated to the conception and design of the analysis; DVO, DC, MH developed and adapted the model; DVO, DC, MH, HSC, BB were involved in the collection, analysis and/or interpretation of the data. All authors had full access to the data and approved the final version of the paper for submission.

### ***CONFLICTS OF INTEREST***

DVO, MH, BB, DC and HSC are employees of the GSK group of companies. MH, DC, and HSC hold shares in the GSK group of companies. SL is a freelance consultant working on behalf of the GSK group of companies.

### ***DATA SHARING STATEMENT***

All data used in this study are presented in the manuscript, references to the original material are provided. Please contact the corresponding author shall you require any additional information.

### ***ETHICAL APPROVAL***

Ethical approval is not applicable for this public health impact modelling analysis.

### ***FUNDING SECTION***

GlaxoSmithKline Biologicals SA funded this study (GSK study identifier: HO-17-18511) and was involved in all stages of study conduct, including analysis of the data. GlaxoSmithKline Biologicals SA also covered all costs associated with the development and publication of this manuscript.

## TABLES AND FIGURES

**Table 1: Demographic, epidemiological and efficacy data according to age group**

| Age                                   |                | 50 YOA              | 60 YOA               | 65 YOA               | 70 YOA               | 80 YOA              |
|---------------------------------------|----------------|---------------------|----------------------|----------------------|----------------------|---------------------|
| Number of people in-age group in 2018 |                | 908,255             | 783,067              | 686,215              | 722,616              | 389,107             |
| HZ incidence per 1,000 individuals    | IC             | 6.85                | 8.80                 | 9.93                 | 11.32                | 12.61               |
|                                       | IC-Free        | 4.9                 | 6.92                 | 8.62                 | 11.04                | 11.02               |
| Proportion developing PHN (%)         |                | 11.42               | 13.89                | 15.71                | 17.12                | 20.42               |
| Non-PHN complications incidence (%)   | Ocular         | 2.87                | 3.82                 | 3.82                 | 4.14                 | 5.41                |
|                                       | Neurological   | 2.46                | 3.17                 | 3.17                 | 5.99                 | 4.23                |
|                                       | Cutaneous      | 1.74                | 1.05                 | 1.05                 | 2.09                 | 2.44                |
|                                       | Other          | 2.03                | 1.63                 | 1.63                 | 2.44                 | 2.85                |
| HZ - Vaccine Efficacy – % (Range)     | RZV<br>2 doses | 98.4<br>(95-100)    | 98.4<br>(95-100)     | 98.4<br>(95-100)     | 97.8<br>(94.1-100)   | 97.8<br>(94.1-100)  |
|                                       | RZV<br>1 dose  | 90.0<br>(58.9-98.9) | 90.0<br>(58.9-98.9)  | 90.0<br>(58.9-98.9)  | 69.5<br>(24.9-89.1)  | 69.5<br>(24.9-89.1) |
|                                       | ZVL            | 69.8<br>(54.1-80.6) | 63.9<br>(56.0-71.0)  | 63.9<br>(56.0-71.0)  | 40.85<br>(28.0-52.0) | 18.25<br>(0-48.0)   |
| PHN Vaccine Efficacy – % (Range)      | RZV<br>2 doses | 98.4<br>(95.0-100)  | 98.4<br>(95.0-100)   | 98.4<br>(95.0-100)   | 97.84<br>(94.1-100)  | 97.84<br>(94.1-100) |
|                                       | RZV<br>1 dose  | 90.0<br>(58.9-98.9) | 90.0<br>(58.9-98.9)  | 90.0<br>(58.9-98.9)  | 69.5<br>(24.9-89.1)  | 69.5<br>(24.9-89.1) |
|                                       | ZVL            | 69.8<br>(30.8-89.6) | 65.69<br>(25.4-84.2) | 65.69<br>(25.4-84.2) | 73.38<br>(51.6-85.8) | 39.51<br>(0-73.8)   |

HZ: herpes zoster; IC: immunocompromised; IC-free: immunocompetent; PHN: postherpetic neuralgia; RZV: adjuvanted recombinant zoster vaccine; YOA: years of age; ZVL: zoster vaccine live

**Table 2: Health outcomes and health resource utilisation in the vaccination cohort 70 YOA - base-case analysis, N=722,616**

|                                 | <b>RZV</b> | <b>ZVL</b> | <b>No vaccination</b> | <b>RZV vs no vaccination</b> | <b>ZVL vs no vaccination</b> |
|---------------------------------|------------|------------|-----------------------|------------------------------|------------------------------|
| HZ cases, n                     | 88,643     | 110,996    | 118,905               | 30,262                       | 7,909                        |
| PHN cases, n                    | 16,570     | 18,411     | 21,979                | 5,409                        | 3,567                        |
| <b>HZ-related complications</b> |            |            |                       |                              |                              |
| Total, n                        | 13,109     | 16,405     | 17,565                | 4,455                        | 1,160                        |
| Ocular, n                       | 4,207      | 5,221      | 5,548                 | 1,341                        | 327                          |
| Neurological, n                 | 4,565      | 5,782      | 6,255                 | 1,691                        | 474                          |
| Cutaneous, n                    | 2,001      | 2,492      | 2,658                 | 657                          | 165                          |
| Other non-pain, n               | 2,336      | 2,910      | 3,103                 | 767                          | 193                          |
| <b>Deaths</b>                   |            |            |                       |                              |                              |
| HZ-related deaths, n            | 56         | 64         | 64                    | 8                            | 0                            |
| <b>Resource utilisation</b>     |            |            |                       |                              |                              |
| Hospitalisation, n              | 7,827      | 9,463      | 9,820                 | 1,993                        | 357                          |
| GP visits, n                    | 438,328    | 546,691    | 583,612               | 145,284                      | 36,921                       |

GP: general practitioner; HZ: herpes zoster; PHN: postherpetic neuralgia; n: number of cases; RZV: adjuvanted recombinant zoster vaccine; YOA: years of age; ZVL: zoster vaccine live

**Table 3 NNV to avoid one case of HZ or PHN according to age at vaccination**

| Age cohort | NNV HZ |     | NNV PHN |     |
|------------|--------|-----|---------|-----|
|            | RZV    | ZVL | RZV     | ZVL |
| 50 YOA     | 10     | 39  | 69      | 328 |
| 60 YOA     | 9      | 27  | 55      | 171 |
| 65 YOA     | 10     | 23  | 54      | 134 |
| 70 YOA     | 12     | 45  | 65      | 98  |
| 80 YOA     | 17     | 156 | 82      | 258 |

RZV: adjuvanted recombinant zoster vaccine; HZ: herpes zoster ; YOA: years of age; ZVL: zoster vaccine live; NNV: number needed to vaccinate

**Table 4 Reduction on resource utilisation per 100,000 people**

|        | GP visits avoided |       | Hospitalisations avoided |     |
|--------|-------------------|-------|--------------------------|-----|
|        | RZV               | ZVL   | RZV                      | ZVL |
| 50 YOA | 17,481            | 3,652 | 126                      | 17  |
| 60 YOA | 22,078            | 6,375 | 216                      | 42  |
| 65 YOA | 23,447            | 8,702 | 266                      | 69  |
| 70 YOA | 20,105            | 5,109 | 276                      | 49  |
| 80 YOA | 15,243            | 1,629 | 394                      | 42  |

GP: general practitioner; HZ: herpes zoster; RZV: adjuvanted recombinant zoster vaccine; YOA: years of age; ZVL: zoster vaccine live

1  
2  
3 **Figure 1 Impact of increasing RZV coverage to 70% - Additional HZ and PHN cases avoided (light blue**  
4 **bars) comparing RZV vs no vaccination in people 70 YOA**  
5

6 HZ: herpes zoster; RZV: adjuvanted recombinant zoster vaccine; PHN: postherpetic neuralgia; YOA: years of age  
7

8 **Figure 2 Impact of second-dose RZV compliance on HZ incidence**  
9

10 HZ: herpes zoster; RZV: adjuvanted recombinant zoster vaccine; ZVL: zoster vaccine live  
11

12 **Figure 3 Scenario analyses: HZ (top) and PHN (down) cases avoided per 100,000 individuals for**  
13 **different vaccination cohorts.**  
14

15 HZ: herpes zoster; no vac: no vaccination; PHN: postherpetic neuralgia; RZV: adjuvanted recombinant zoster  
16 vaccine; YOA: years of age; ZVL: zoster vaccine live  
17

18 **Figure 4 Tornado Diagram: HZ cases avoided with RZV compared with ZVL – Base-case analysis (70**  
19 **YOA; coverage 48.3%; compliance 70%)**  
20

21 HZ: herpes zoster; RZV: adjuvanted recombinant zoster vaccine; YOA: years of age; ZVL: zoster vaccine live  
22

23 Lower values are in orange and upper values are in grey  
24

25 **Figure 5 Probabilistic Sensitivity Analysis: HZ cases avoided with RZV compared to ZVL**  
26

27 HZ: herpes zoster; RZV: adjuvanted recombinant zoster vaccine; ZVL: zoster vaccine live  
28

29 The orange line shows the percentage of simulations averting at least the number of HZ cases shown on the x-axis.  
30

31 **Figure 6 Lay language summary of the study**  
32  
33  
34  
35  
36  
37  
38  
39  
40  
41  
42  
43  
44  
45  
46  
47  
48  
49  
50  
51  
52  
53  
54  
55  
56  
57  
58  
59  
60

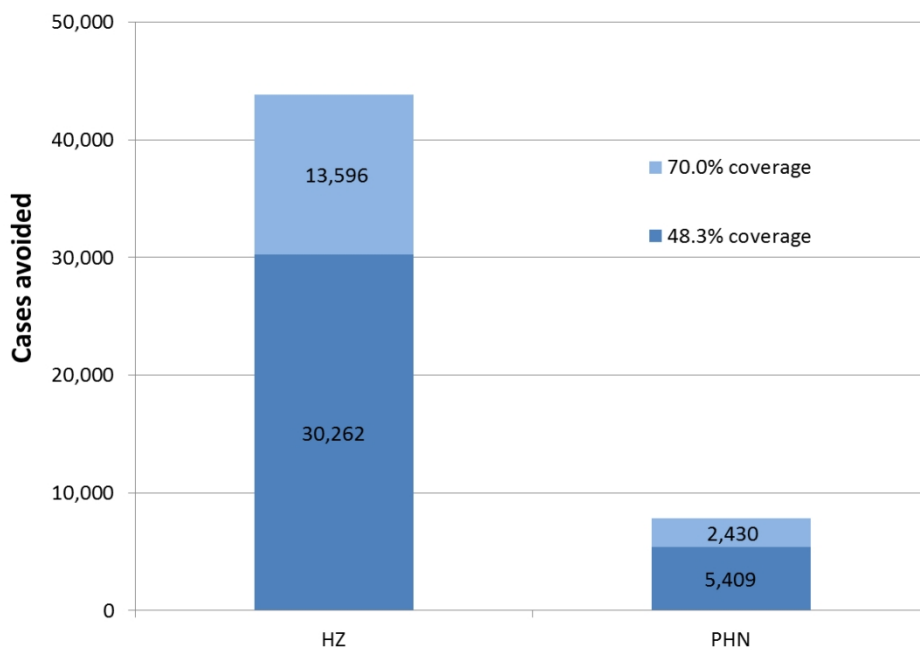

Impact of increasing RZV coverage to 70% - Additional HZ and PHN cases avoided (light blue bars) comparing RZV vs no vaccination in people 70 YOA

109x75mm (300 x 300 DPI)

1  
2  
3  
4  
5  
6  
7  
8  
9  
10  
11  
12  
13  
14  
15  
16  
17  
18  
19  
20  
21  
22  
23  
24  
25  
26  
27  
28  
29  
30  
31  
32  
33  
34  
35  
36  
37  
38  
39  
40  
41  
42  
43  
44  
45  
46  
47  
48  
49  
50  
51  
52  
53  
54  
55  
56  
57  
58  
59  
60

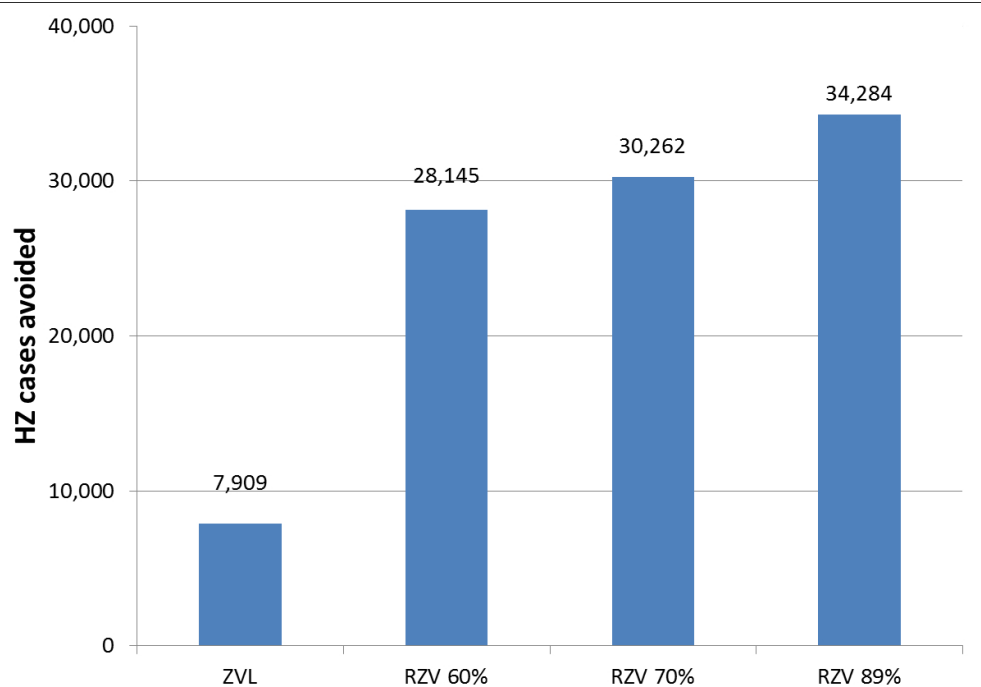

Impact of second-dose RZV compliance on HZ incidence

103x72mm (300 x 300 DPI)



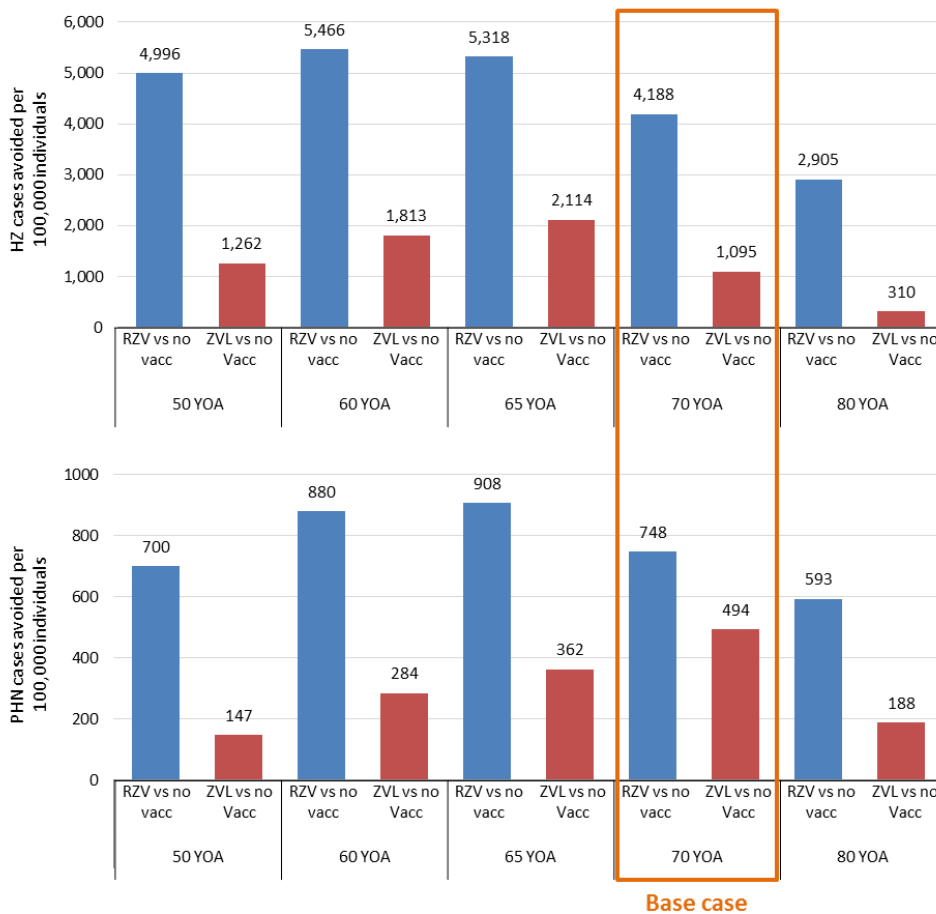

Scenario analyses: HZ (top) and PHN (down) cases avoided per 100,000 individuals for different vaccination cohorts.

81x80mm (300 x 300 DPI)

1  
2  
3  
4  
5  
6  
7  
8  
9  
10  
11  
12  
13  
14  
15  
16  
17  
18  
19  
20  
21  
22  
23  
24  
25  
26  
27  
28  
29  
30  
31  
32  
33  
34  
35  
36  
37  
38  
39  
40  
41  
42  
43  
44  
45  
46  
47  
48  
49  
50  
51  
52  
53  
54  
55  
56  
57  
58  
59  
60

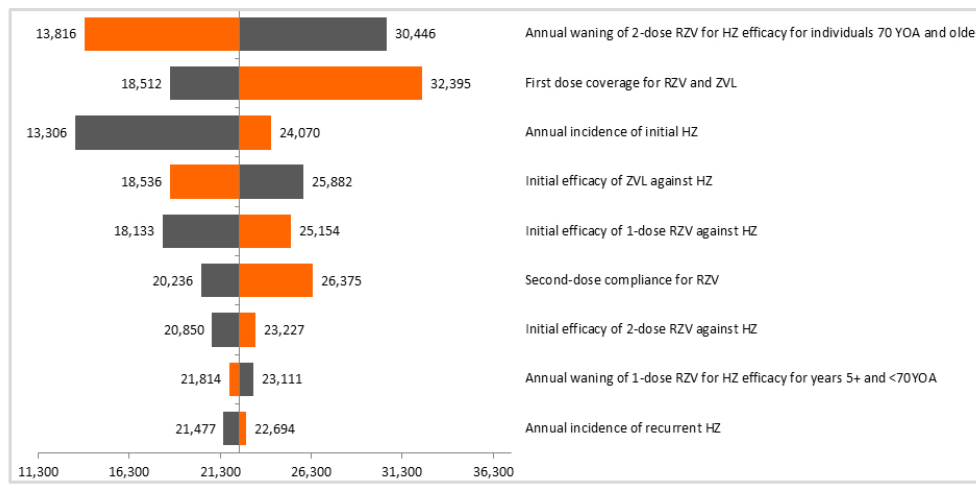

Tornado Diagram: HZ cases avoided with RZV compared with ZVL – Base-case analysis (70 YOA; coverage 48.3%; compliance 70%)

81x60mm (300 x 300 DPI)

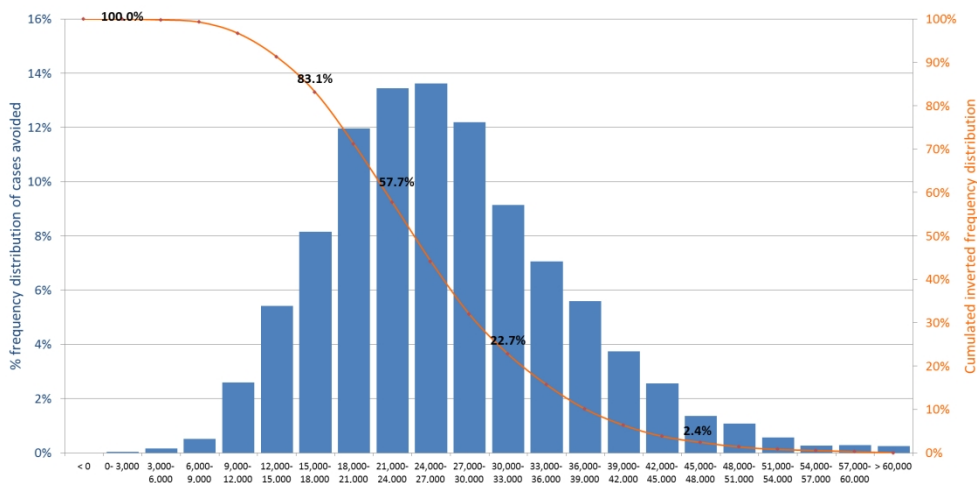

Probabilistic Sensitivity Analysis: HZ cases avoided with RZV compared to ZVL

177x86mm (300 x 300 DPI)

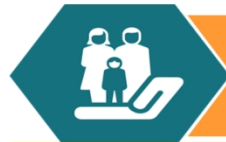

## Focus on the Patient

### What is the context?

Herpes zoster (shingles) is a painful rash that lasts for several weeks and which can lead to prolonged pain even after the initial rash has cleared. Herpes zoster arises when varicella zoster virus, acquired during varicella, reactivates. This happens especially in older people with a weakened immune system. Herpes zoster has a detrimental impact on the quality of life and current treatment options provide only partial symptom relief.

### What is new?

In the UK, a universal mass vaccination programme against herpes zoster has been introduced in 2013. The programme recommends vaccination of people aged 70 or 78 years with *Zostavax*, the only vaccine available at that time. In 2018, a new vaccine against herpes zoster, *Shingrix*, has become available. The goal of this study was to explore the impact of different vaccination strategies using a mathematical model.

### What is the impact?

The model predicts that *Shingrix* would lead to a greater reduction in the number of herpes zoster episodes compared to *Zostavax*. If adopting a vaccination strategy with *Shingrix*, the optimal age at vaccination would be 60 or 65 years old.

Lay language summary of the study

108x60mm (300 x 300 DPI)

1  
2  
3  
4  
5  
6  
7  
8  
9  
10  
11  
12  
13  
14  
15  
16  
17  
18  
19  
20  
21  
22  
23  
24  
25  
26  
27  
28  
29  
30  
31  
32  
33  
34  
35  
36  
37  
38  
39  
40  
41  
42  
43  
44  
45  
46  
47  
48  
49  
50  
51  
52  
53  
54  
55  
56  
57  
58  
59  
60

## Supplementary Material

# Evaluation of the public health impact of introducing a novel Adjuvanted Recombinant Zoster Vaccine into the UK universal mass vaccination programme

Van Oorschot Desirée, Hunjan Manjit, Bracke Benjamin, Lorenc Stéphane, Curran Desmond, Starkie Camejo Helen

BMJ Open

**SI Table 1: Mortality in the general UK population in 2018/2019**

| Age (YOA) | Number of deaths | Annual probability of death |
|-----------|------------------|-----------------------------|
| 50-54     | 15,903           | 0.00342                     |
| 55-59     | 22,590           | 0.00544                     |
| 60-64     | 29,886           | 0.008366                    |
| 65-69     | 45,562           | 0.013091                    |
| 70-74     | 65,747           | 0.021570                    |
| 75-79     | 78,692           | 0.036493                    |
| 80-84     | 104,536          | 0.065713                    |
| 85-89     | 114,461          | 0.117689                    |
| 90-94     | 82,948           | 0.198093                    |
| 95-99     | 33,361           | 0.304037                    |
| ≥ 100     | 5,496            | 0.436439                    |

YOA: years of age.

Projected numbers using data reported by the Office of National Statistics based on observed numbers of the UK population in 2014.<sup>1</sup>

The immunocompromised (IC) population was identified as individuals presenting one of the following conditions: Hematopoietic stem cell transplantation, solid organ transplantation, solid organ malignancies, haematological malignancies, human immunodeficiency virus, end-stage renal disease, corticosteroid exposure, other immunosuppressive therapy, other immunodeficiency conditions and autoimmune diseases (rheumatoid arthritis, systemic lupus erythematosus, inflammatory bowel disease, psoriasis, multiple sclerosis, polymyalgia rheumatica and autoimmune thyroiditis).<sup>2</sup>

Herpes Zoster (HZ) incidence for the whole (IC and IC-free) population was calculated by applying a weighting for IC proportion by age group.<sup>3</sup> A unitary weight across the populations was not deemed to be appropriate or robust as prevalence of herpes zoster varies between the age groups; rising with increasing age. This is because applying IC incidence, accounting for the overall proportion of IC (16.2%) irrespective of age group would underestimate the incidence in older people and overestimate it in younger people.

**SI Table 2: Weighting CPRD population for IC proportion by age**

| Age Group (YOA) | Prevalence of IC (%) | IC weighting | IC-free weighting |
|-----------------|----------------------|--------------|-------------------|
| 50-59           | 16.13                | 0.161        | 0.839             |
| 60-64           | 22.26                | 0.223        | 0.777             |
| 65-69           | 27.56                | 0.276        | 0.724             |
| 70-79           | 34.88                | 0.349        | 0.651             |
| ≥ 80            | 42.16                | 0.422        | 0.578             |

CPRD: Clinical Practice Research Datalink; IC: immunocompromised; IC-free: immunocompetent; YOA: years of age

**SI Table 3: Incidence and probability of HZ in the whole population**

| Age (YOA) | Incidence rate/1,000 patient years |         | Probability | Range       |             |
|-----------|------------------------------------|---------|-------------|-------------|-------------|
|           | IC                                 | IC-Free |             | Lower limit | Upper limit |
| 50-59     | 6.85                               | 4.9     | 0.0052      | 0.00375     | 0.00791     |
| 60-64     | 8.8                                | 6.92    | 0.0073      | 0.004392    | 0.009001    |
| 65-69     | 9.93                               | 8.62    | 0.0089      | 0.005108    | 0.010147    |
| 70-79     | 11.32                              | 11.04   | 0.0111      | 0.005975    | 0.011605    |
| ≥ 80      | 12.61                              | 11.02   | 0.0116      | 0.007363    | 0.013955    |

HZ: herpes zoster; IC: immunocompromised; IC-free: immunocompetent; YOA: years of age

**SI Table 4: Proportion of PHN (after 3 months)**

| Age (YOA) | Proportion (%) | Lower limit (%) | Upper limit (%) |
|-----------|----------------|-----------------|-----------------|
| 50-59     | 11.418         | 8.91            | 14.13           |
| 60-64     | 13.894         | 12.03           | 15.88           |
| 65-69     | 15.705         | 13.95           | 17.57           |
| 70-79     | 17.116         | 13.53           | 20.94           |
| ≥ 80      | 20.418         | 17.08           | 23.82           |

PHN: postherpetic neuralgia; YOA: years of age

**SI Table 5 HZ-associated mortality**

| Age (YOA) | Probability | Lower limit | Upper limit |
|-----------|-------------|-------------|-------------|
| 50-54     | 0.00001     | 0.0000063   | 0.000012    |
| 55-59     | 0.00001     | 0.0000063   | 0.000012    |
| 60-64     | 0.00003     | 0.0000189   | 0.000035    |
| 65-69     | 0.00003     | 0.0000189   | 0.000035    |
| 70-74     | 0.00004     | 0.0000245   | 0.000046    |
| 75-79     | 0.00009     | 0.0000644   | 0.000120    |
| 80-84     | 0.00049     | 0.0003409   | 0.000633    |
| 85-89     | 0.00202     | 0.0014126   | 0.002623    |
| 90-94     | 0.00202     | 0.0014126   | 0.002623    |
| 95-99     | 0.00202     | 0.0014126   | 0.002623    |
| ≥ 100     | 0.00202     | 0.0014126   | 0.002623    |

HZ: herpes zoster; YOA: years of age

**SI Table 6: Hospitalisation rates in IC and IC-free cohort, derived from CPRD database**

| Age (YOA) | IC                         | IC-free                    | ALL               |
|-----------|----------------------------|----------------------------|-------------------|
|           | Mean<br>Events 90-365 days | Mean<br>Events 90-365 days | Weighted Average* |
| 50-59     | 0.044                      | 0.007                      | 0.012622          |
| 60-64     | 0.054                      | 0.009                      | 0.019245          |
| 65-69     | 0.050                      | 0.014                      | 0.023713          |
| 70-79     | 0.074                      | 0.030                      | 0.045143          |
| ≥ 80      | 0.168                      | 0.115                      | 0.135529          |

CPRD: Clinical Practice Research Datalink; IC: immunocompromised; IC-free: immunocompetent; YOA: years of age; IC-free: immunocompetent

\*Weighted averages calculated using IC proportions in the CPRD study.

**SI Table 7 GP visits in IC and IC-free cohort, derived from CPRD database**

| Age (YOA) | IC                         | IC-free                    | ALL               |
|-----------|----------------------------|----------------------------|-------------------|
|           | Mean<br>Events 90-365 days | Mean<br>Events 90-365 days | Weighted Average* |
| 50-59     | 3.75                       | 2.69                       | 2.86              |
| 60-64     | 4.41                       | 2.86                       | 3.20              |
| 65-69     | 5.05                       | 3.19                       | 3.70              |
| 70-79     | 5.75                       | 4.09                       | 4.67              |
| ≥ 80      | 6.15                       | 4.59                       | 5.25              |

\*Weighted averages calculated using IC proportions in the CPRD study.



CPRD: Clinical Practice Research Datalink; GP: general practitioner; IC: immunocompromised; IC-free: immunocompetent; YOA: years of age

**SI Table 8: Vaccine Efficacy against HZ and PHN**

| Age (YOA)  | ZVL      |             |             | RZV – 2-dose |             |             | RZV – 1-dose |             |             |
|------------|----------|-------------|-------------|--------------|-------------|-------------|--------------|-------------|-------------|
|            | Efficacy | Lower limit | Upper limit | Efficacy     | Lower limit | Upper limit | Efficacy     | Lower limit | Upper limit |
| <b>HZ</b>  |          |             |             |              |             |             |              |             |             |
| 50-59      | 0.698    | 0.5410      | 0.8060      | 0.984        | 0.9500      | 1.0000      | 0.9          | 0.5890      | 0.9890      |
| 60-64      | 0.6389   | 0.5600      | 0.7100      | 0.984        | 0.9500      | 1.0000      | 0.9          | 0.5890      | 0.9890      |
| 65-69      | 0.6389   | 0.5600      | 0.7100      | 0.984        | 0.9500      | 1.0000      | 0.9          | 0.5890      | 0.9890      |
| 70-79      | 0.4085   | 0.2800      | 0.5200      | 0.9784       | 0.9410      | 1.0000      | 0.695        | 0.2490      | 0.8910      |
| ≥ 80       | 0.1825   | 0.0000      | 0.4800      | 0.9784       | 0.9410      | 1.0000      | 0.695        | 0.2490      | 0.8910      |
| <b>PHN</b> |          |             |             |              |             |             |              |             |             |
| 50-59      | 0.698    | 0.3080      | 0.8960      | 0.984        | 0.9500      | 1.0000      | 0.9          | 0.5890      | 0.9890      |
| 60-64      | 0.6569   | 0.2540      | 0.8420      | 0.984        | 0.9500      | 1.0000      | 0.9          | 0.5890      | 0.9890      |
| 65-69      | 0.6569   | 0.2540      | 0.8420      | 0.984        | 0.9500      | 1.0000      | 0.9          | 0.5890      | 0.9890      |
| 70-79      | 0.7338   | 0.5160      | 0.8580      | 0.9784       | 0.9410      | 1.0000      | 0.695        | 0.2490      | 0.8910      |
| ≥ 80       | 0.3951   | 0.0000      | 0.7380      | 0.9784       | 0.9410      | 1.0000      | 0.695        | 0.2490      | 0.8910      |

HZ: herpes zoster; PHN: postherpetic neuralgia; RZV: adjuvanted recombinant zoster vaccine; YOA: years of age; ZVL: zoster vaccine live

**SI Table 9: Vaccine Waning**

| Vaccine      | Age group (YOA)/years after vaccination | Value  | 5% CI  | 95% CI |
|--------------|-----------------------------------------|--------|--------|--------|
| ZVL – 1-dose | All ages/Years 1-4                      | 0.0543 | 0.0450 | 0.0640 |
|              | All ages/Years 4+                       | 0.0510 | 0.0410 | 0.0600 |
| RZV – 2-dose | < 70 YOA/Years 1-4                      | 0.010  | 0.0000 | 0.0260 |
|              | < 70 YOA/Years 4+                       | 0.0230 | 0.0070 | 0.0460 |
|              | ≥70 YOA/ all years after vaccination    | 0.0360 | 0.0140 | 0.0660 |
| RZV – 1-dose | All ages/Years 1-4                      | 0.0543 | 0.0450 | 0.0640 |
|              | All ages/Years 4+                       | 0.0510 | 0.0410 | 0.0600 |

CI: confidence interval; RZV: adjuvanted recombinant zoster vaccine; YOA: years of age; ZVL: zoster vaccine live

**REFERENCES**

1. Office of National Statistics. 2014 based National population projections. available from: <https://www.ons.gov.uk/file?uri=/peoplepopulationandcommunity/populationandmigration/populationprojections/datasets/localauthoritiesinenglandtable2/2014based/table2.xls> [accessed June 13, 2018].
2. Yanni EA, Ferreira G, Guennec M, et al. Burden of herpes zoster in 16 selected immunocompromised populations in England: a cohort study in the Clinical Practice Research Datalink 2000–2012. *BMJ Open* 2018;**8**(6). doi:10.1136/bmjopen-2017-020528
3. Curran D, Hunjan M, El Ghachi A, et al. Herpes Zoster Related Healthcare Burden And Costs In Both Immunocompromised (IC) And IC-Free Populations In The United Kingdom. *Value Health* 2017;**20**(9):A786. doi:10.1016/j.jval.2017.08.2296

For peer review only

| Section/Item                    | Item no | Recommendation                                                                                                                                                                         | Reported on page no/line no | Comment                                                                                                                                                                                                                                                                                                                                                                                                                             |
|---------------------------------|---------|----------------------------------------------------------------------------------------------------------------------------------------------------------------------------------------|-----------------------------|-------------------------------------------------------------------------------------------------------------------------------------------------------------------------------------------------------------------------------------------------------------------------------------------------------------------------------------------------------------------------------------------------------------------------------------|
| <b>Title and abstract</b>       |         |                                                                                                                                                                                        |                             |                                                                                                                                                                                                                                                                                                                                                                                                                                     |
| Title                           | 1       | Identify the study as an economic evaluation or use more specific terms such as “cost-effectiveness analysis”, and describe the interventions compared                                 | p 1                         | Strictly speaking, this is not an economic evaluation but public health impact study, as stated in the title                                                                                                                                                                                                                                                                                                                        |
| Abstract                        | 2       | Provide a structured summary of objectives, perspective, setting, methods (including study design and inputs), results (including base case and uncertainty analyses), and conclusions | P 4/5                       |                                                                                                                                                                                                                                                                                                                                                                                                                                     |
| <b>Introduction</b>             |         |                                                                                                                                                                                        |                             |                                                                                                                                                                                                                                                                                                                                                                                                                                     |
| Background and Objectives       | 3       | Provide an explicit statement of the broader context for the study. Present the study question and its relevance for health policy or practice decisions                               | p. 7<br>p. 8                | Context provided in first paragraph (epidemiology and rise of HZ episodes during past decades)<br>“The objective of this study is to explore the public health impact of introducing the RZV vaccine in the UK in the routine population 70 YOA.”                                                                                                                                                                                   |
| <b>Methods</b>                  |         |                                                                                                                                                                                        |                             |                                                                                                                                                                                                                                                                                                                                                                                                                                     |
| Target population and subgroups | 4       | Describe characteristics of the base case population and subgroups analysed, including why they were chosen                                                                            | p. 8<br>p. 8/p. 12          | See sentence above for base-case scenario (routine population 70 YOA).<br>“Different scenario analyses are carried out to assess the impact of first dose RZV coverage and second dose RZV compliance and to determine the optimal age for vaccination.”<br>Base-case was chosen because representing the current routine vaccination cohort in the UK.<br>Scenario analyses chosen to test uncertainties in coverage and potential |

|                               |     |                                                                                                                                        |              |                                                                                                                                                                                                                                                                        |
|-------------------------------|-----|----------------------------------------------------------------------------------------------------------------------------------------|--------------|------------------------------------------------------------------------------------------------------------------------------------------------------------------------------------------------------------------------------------------------------------------------|
|                               |     |                                                                                                                                        |              | differences in optimal vaccination age between RZV and ZVL as explained on page 12.                                                                                                                                                                                    |
| Setting and location          | 5   | State relevant aspects of the system(s) in which the decision(s) need(s) to be made                                                    | p. 8<br>p. 9 | UK setting where there is UMV currently in place.<br>“The ZOster ecoNomic Analysis (ZONA), a static multi-cohort Markov model previously developed using Microsoft Excel, was adapted to the UK setting”                                                               |
| Study perspective             | 6   | Describe the perspective of the study and relate this to the costs being evaluated                                                     | NA           | Public health impact study, not cost-effectiveness study.                                                                                                                                                                                                              |
| Comparators                   | 7   | Describe the interventions or strategies being compared and state why they were chosen                                                 | p. 9<br>p. 8 | Vaccination with RZV, with ZVL and no vaccination<br><br>UK setting with current UMV with ZVL<br>And a small portion of patients contraindicated to ZVL (no vaccination)                                                                                               |
| Time horizon                  | 8   | State the time horizon(s) over which costs and consequences are being evaluated and say why appropriate                                | p. 10        | “Cycle length is set to one year and a life-long time horizon is assumed.”                                                                                                                                                                                             |
| Discount rate                 | 9   | Report the choice of discount rate(s) used for costs and outcomes and say why appropriate                                              | NA           | Public health impact study, not cost-effectiveness study.                                                                                                                                                                                                              |
| Choice of health outcomes     | 10  | Describe what outcomes were used as the measure(s) of benefit in the evaluation and their relevance for the type of analysis performed | p. 12        | “The model was used to estimate the avoidance of HZ and PHN cases, complications, deaths, GP visits and hospitalisations cases, complications due to HZ, HZ-related deaths and number of GP visits and hospitalisations for three different vaccination strategies...” |
| Measurements of effectiveness | 11a | Single study-based estimates: Describe fully the design features of the single effectiveness study and why the single study            | NA           |                                                                                                                                                                                                                                                                        |

|                                         |     |                                                                                                                                                                                                                                                                                                                        |       |                                                                                                                                                                                                                                                                                                                                      |
|-----------------------------------------|-----|------------------------------------------------------------------------------------------------------------------------------------------------------------------------------------------------------------------------------------------------------------------------------------------------------------------------|-------|--------------------------------------------------------------------------------------------------------------------------------------------------------------------------------------------------------------------------------------------------------------------------------------------------------------------------------------|
|                                         |     | was a sufficient source of clinical effectiveness data                                                                                                                                                                                                                                                                 |       |                                                                                                                                                                                                                                                                                                                                      |
|                                         | 11b | Synthesis-based estimates: Describe fully the methods used for identification of included studies and synthesis of clinical effectiveness data                                                                                                                                                                         | p. 11 | “Vaccine efficacy against HZ and PHN ( $VE_{HZ}$ and $VE_{PHN}$ , respectively) were derived from the SPS trial and the Zoster Efficacy and Safety Study (ZEST) for ZVL and from the ZOE-50 and ZOE-70 trials for RZV (Table 1, SI Table 8).”<br>And following paragraphs for efficacy/waning                                        |
| Measurement of valuation based outcomes | 12  | If applicable, describe the population and methods used to elicit preferences for outcomes                                                                                                                                                                                                                             | NA    | Public health impact study, not cost-effectiveness study.                                                                                                                                                                                                                                                                            |
| Estimating resources and costs          | 13a | Single study-based economic evaluation: Describe approaches used to estimate resource use associated with the alternative interventions.<br>Describe primary or secondary research methods for valuing each resource item in terms of its unit cost. Describe any adjustments made to approximate to opportunity costs | NA    |                                                                                                                                                                                                                                                                                                                                      |
|                                         | 13b | Model-based economic evaluation: Describe approaches and data sources used to estimate resource use associated with model health states. Describe primary or secondary research methods for valuing each resource item in terms of its unit cost. Describe any adjustments made to approximate to opportunity costs    | P. 11 | “The CPRD study was used to derive the proportion of patients being hospitalised or visiting their GP due to HZ-related complications. Hospitalisation rates were higher in the IC cohort for all age-groups. In addition, health-care resource use was higher in older adults (SI Tables 6 & 7).”<br>No unit costs, since PHI study |
| Currency, price date, and conversion    | 14  | Report the dates of the estimated resource quantities and unit costs. Describe methods for adjusting estimated unit costs to the year of reported costs if necessary. Describe                                                                                                                                         | NA    |                                                                                                                                                                                                                                                                                                                                      |

1  
2  
3  
4  
5  
6  
7  
8  
9  
10  
11  
12  
13  
14  
15  
16  
17  
18  
19  
20  
21  
22  
23  
24  
25  
26  
27  
28  
29  
30  
31  
32  
33  
34  
35  
36  
37  
38  
39  
40  
41  
42  
43  
44  
45  
46  
47

|                    |    |                                                                                                                                                                                                                                                                                                                                                      |                                               |                                                                                                                                                                                                                                                                                                                                                 |
|--------------------|----|------------------------------------------------------------------------------------------------------------------------------------------------------------------------------------------------------------------------------------------------------------------------------------------------------------------------------------------------------|-----------------------------------------------|-------------------------------------------------------------------------------------------------------------------------------------------------------------------------------------------------------------------------------------------------------------------------------------------------------------------------------------------------|
|                    |    | methods for converting costs into a common currency base and the exchange rate                                                                                                                                                                                                                                                                       |                                               |                                                                                                                                                                                                                                                                                                                                                 |
| Choice of model    | 15 | Describe and give reasons for the specific type of decision-analytical model used. Providing a figure to show model structure is strongly recommended                                                                                                                                                                                                | p. 9                                          | “The ZOster ecoNomic Analysis (ZONA), a static multi-cohort Markov model previously developed using Microsoft Excel, was adapted to the UK setting.”<br>Reference is made to Curran et al, 2017 which shows Figure and additional details regarding model structure                                                                             |
| Assumptions        | 16 | Describe all structural or other assumptions underpinning the decision analytical model                                                                                                                                                                                                                                                              | p. 9<br><br>p. 12                             | First paragraph (Model structure) and Curran et al, 2017<br><br>Coverage and compliance assumptions: “In the base-case analysis, coverage is set at 48.3% in line with latest coverage numbers for the UK. The impact of different coverage rates was assessed in sensitivity analyses. Compliance with the second-dose of RZV was set to 70%.” |
| Analytical methods | 17 | Describe all analytical methods supporting the evaluation. This could include methods for dealing with skewed, missing, or censored data; extrapolation methods; methods for pooling data; approaches to validate or make adjustments (such as half cycle corrections) to a model; and methods for handling population heterogeneity and uncertainty | p. 12<br><br>p. 13                            | “Different scenario analyses were carried out where assumptions regarding vaccination coverage and compliance and age at vaccination were changed”<br>And rest of paragraph<br><br>Sensitivity analyses (DSA and PSA) described                                                                                                                 |
| <b>Results</b>     |    |                                                                                                                                                                                                                                                                                                                                                      |                                               |                                                                                                                                                                                                                                                                                                                                                 |
| Study parameters   | 18 | Report the values, ranges, references, and, if used, probability distributions for all parameters. Report reasons or sources for distributions used to represent uncertainty where appropriate. Providing a table to                                                                                                                                 | p. 15<br>SI Tables 3 – 5<br>and Tables 8 - 11 | “In DSA analyses carried out for the base-case scenario in the age-cohort 70 YOA, the robustness of results was tested by changing input parameters to their lower and upper estimated confidence ranges (SI Tables 3 – 5;                                                                                                                      |

|                                                                      |     |                                                                                                                                                                                                                                                                           |                                                            |                                                                                                                                                                                                                                                            |
|----------------------------------------------------------------------|-----|---------------------------------------------------------------------------------------------------------------------------------------------------------------------------------------------------------------------------------------------------------------------------|------------------------------------------------------------|------------------------------------------------------------------------------------------------------------------------------------------------------------------------------------------------------------------------------------------------------------|
|                                                                      |     | show the input values is strongly recommended                                                                                                                                                                                                                             |                                                            | SI Tables 8 - 11)"                                                                                                                                                                                                                                         |
| Incremental costs and outcomes                                       | 19  | For each intervention, report mean values for the main categories of estimated costs and outcomes of interest, as well as mean differences between the comparator groups. If applicable, report incremental cost-effectiveness ratios                                     | p. 14<br>Table 2                                           | "In the base-case scenario (cohort 70 YOA) RZV reduced the number of HZ and PHN cases by 30,262 and 5,409, respectively, compared to no vaccination. ZVL led to a reduction of 7,909 HZ and 3,567 PHN cases ( <b>Error! Reference source not found.</b> )" |
| Characterising uncertainty                                           | 20a | Single study-based economic evaluation: Describe the effects of sampling uncertainty for the estimated incremental cost and incremental effectiveness parameters, together with the impact of methodological assumptions (such as discount rate, study perspective)       | NA                                                         |                                                                                                                                                                                                                                                            |
|                                                                      | 20b | Model-based economic evaluation: Describe the effects on the results of uncertainty for all input parameters, and uncertainty related to the structure of the model and assumptions                                                                                       | p. 13/14<br>Figure 1-3<br>Table 3<br><br>p. 15<br>Figure 4 | Scenario analyses<br><br>Sensitivity analyses                                                                                                                                                                                                              |
| Characterising heterogeneity                                         | 21  | If applicable, report differences in costs, outcomes, or cost-effectiveness that can be explained by variations between subgroups of patients with different baseline characteristics or other observed variability in effects that are not reducible by more information | p. 14<br>Figure 3                                          | Subgroup analyses according to age cohorts                                                                                                                                                                                                                 |
| Discussion                                                           |     |                                                                                                                                                                                                                                                                           |                                                            |                                                                                                                                                                                                                                                            |
| Study findings, limitations, generalisability, and current knowledge | 22  | Summarise key study findings and describe how they support the conclusions reached. Discuss limitations and the generalisability of the findings and how the findings fit with current knowledge                                                                          | p. 15                                                      | "In the base-case considering the current vaccination cohort of people 70 YOA, RZV reduced the number of HZ and PHN cases by 30,262 and 5,409 compared to no vaccination..." and subsequent paragraphs                                                     |

1  
2  
3  
4  
5  
6  
7  
8  
9  
10  
11  
12  
13  
14  
15  
16  
17  
18  
19  
20  
21  
22  
23  
24  
25  
26  
27  
28  
29  
30  
31  
32  
33  
34  
35  
36  
37  
38  
39  
40  
41  
42  
43  
44  
45  
46  
47

|                       |    |                                                                                                                                                                                                                                                  |                       |                                                                                                                                                                  |
|-----------------------|----|--------------------------------------------------------------------------------------------------------------------------------------------------------------------------------------------------------------------------------------------------|-----------------------|------------------------------------------------------------------------------------------------------------------------------------------------------------------|
|                       |    |                                                                                                                                                                                                                                                  | p. 18<br><br>p. 17/18 | “As with every model, there are strengths and limitations associated with the modelling strategy employed....”<br><br>Comparison to existing PHI and CE studies. |
| Other                 |    |                                                                                                                                                                                                                                                  |                       |                                                                                                                                                                  |
| Source of funding     | 23 | Describe how the study was funded and the role of the funder in the identification, design, conduct, and reporting of the analysis. Describe other non-monetary sources of support                                                               | p. 20                 | Funding                                                                                                                                                          |
| Conflicts of interest | 24 | Describe any potential for conflict of interest of study contributors in accordance with journal policy. In the absence of a journal policy, we recommend authors comply with International Committee of Medical Journal Editors recommendations | p. 20                 | Conflict of interest                                                                                                                                             |

Review only



# BMJ Open

## Public health impact model estimating the impact of introducing an Adjuvanted Recombinant Zoster Vaccine into the UK universal mass vaccination programme.

|                                 |                                                                                                                                                                                                                                                               |
|---------------------------------|---------------------------------------------------------------------------------------------------------------------------------------------------------------------------------------------------------------------------------------------------------------|
| Journal:                        | <i>BMJ Open</i>                                                                                                                                                                                                                                               |
| Manuscript ID                   | bmjopen-2018-025553.R2                                                                                                                                                                                                                                        |
| Article Type:                   | Research                                                                                                                                                                                                                                                      |
| Date Submitted by the Author:   | 15-Jan-2019                                                                                                                                                                                                                                                   |
| Complete List of Authors:       | van Oorschot, Desiree; GlaxoSmithKline<br>Hunjan, Manjit; GlaxoSmithKline<br>Bracke, Benjamin ; GlaxoSmitKline<br>Lorenc, Stephane; GlaxoSmithKline, Freelance on behalf of GSK<br>Curran, Desmond; GlaxoSmithKline<br>Starkie-Camejo, Helen; GlaxoSmithKline |
| <b>Primary Subject Heading</b>: | Health policy                                                                                                                                                                                                                                                 |
| Secondary Subject Heading:      | Infectious diseases                                                                                                                                                                                                                                           |
| Keywords:                       | Shingles, Adult vaccination, herpes zoster, recombinant zoster vaccine, Public health < INFECTIOUS DISEASES, Health policy < HEALTH SERVICES ADMINISTRATION & MANAGEMENT                                                                                      |
|                                 |                                                                                                                                                                                                                                                               |

SCHOLARONE™  
Manuscripts

1  
2  
3  
4  
5 **TITLE PAGE**  
6  
7

8 **TYPE OF MANUSCRIPT:**  
9

10  
11 **MANUSCRIPT TITLE:**  
12

13 *Public health impact model estimating the impact of introducing an Adjuvanted*  
14 *Recombinant Zoster Vaccine into the UK universal mass vaccination programme*  
15

16  
17 **AUTHOR(S):**  
18

19 Van Oorschot Desirée<sup>1</sup>, Hunjan Manjit<sup>2</sup>, Bracke Benjamin<sup>1</sup>, Lorenc Stéphane<sup>3</sup>, Curran  
20 Desmond<sup>1</sup>, Starkie Camejo Helen<sup>2</sup>  
21  
22

23  
24 **AFFILIATIONS:**  
25

26 <sup>1</sup> GSK, Wavre, Belgium; <sup>2</sup> GSK, Uxbridge, UK; <sup>3</sup> Freelance, on behalf of GSK, Wavre,  
27 Belgium  
28  
29

30  
31 **CORRESPONDING AUTHOR:**  
32

33 Name: Van Oorschot Desirée  
34

35 Mailing Address: Avenue Fleming 20, 1300, Wavre, Belgium  
36

37 Phone No: +3210855111  
38

39 E-mail address: desiree.x.van-oorschot@gsk.com  
40  
41  
42  
43  
44  
45  
46  
47  
48  
49  
50  
51  
52  
53  
54  
55  
56  
57  
58  
59  
60

## **ABSTRACT**

### **OBJECTIVES**

In 2013, the Herpes Zoster (HZ) immunisation programme was introduced in the UK, recommending vaccination of adults 70 years of age (YOA) with the zoster vaccine live (ZVL), the only vaccine available at the time. The recently approved Adjuvanted Recombinant Zoster Vaccine (RZV) has a substantially different clinical profile that may offer additional benefits.

This study aimed to 1) assess the public health impact (PHI) of introducing RZV in the UK compared to the current vaccination strategy and 2) explore via scenario analyses the optimal age-group of vaccination in terms of PHI.

### **DESIGN**

A previously developed health economic model was adapted to the UK setting.

### **SETTING**

Calculations were based on efficacy data from pivotal clinical trials, HZ incidence and PHN probability from a UK study, and HZ-associated complication rates from published literature.

### **POPULATION**

The base-case population considered a 2018-projected UK vaccination cohort of individuals 70 YOA.

### **INTERVENTIONS**

Vaccination with ZVL or RZV, assuming a first-dose coverage of 48.3% for both vaccines and 70% compliance for the second-dose of RZV.

### **OUTCOME MEASURES**

Outcomes included reduction of HZ and postherpetic neuralgia (PHN) cases, complications and the use of health-care resources over a life-time horizon. The impact of coverage and second-dose compliance was also explored.

## *RESULTS*

Compared to no vaccination, RZV would lead to a reduction of 30,262 HZ and 5,409 PHN cases while ZVL would lead to a reduction of 7,909 HZ and 3,567 PHN cases. The number needed to vaccinate to prevent 1 HZ case is 12 with RZV and 45 with ZVL. The highest PHI with RZV could be achieved in individuals 60 or 65 YOA.

## *CONCLUSION*

Under the model assumptions, RZV is predicted to avert more HZ and PHN cases compared to ZVL. Results were robust under different scenario and sensitivity analyses.

## *KEYWORDS*

Herpes Zoster vaccination; adjuvanted recombinant zoster vaccine; public health impact

## *STRENGTHS AND LIMITATIONS OF THIS STUDY*

- The most recent UK-specific data from published literature is included in the ZONA model.
- Model structure and inputs have been validated by external experts.
- Results of this analyses estimate the impact of an RZV program in the UK population in 2018.
- Further analyses have to be performed once long term effectiveness data becomes available on the duration of protection of RZV.
- Assumptions regarding second dose compliance had to be made in absence of real-world data.

## INTRODUCTION

The varicella zoster virus (VZV) usually affects children and leads to varicella, also known as chickenpox. The virus remains dormant life-long in patients' dorsal root ganglia.<sup>1</sup> Later in life, VZV specific T-cell-immunity decreases due to immunosenescence or immunosuppressing illnesses or medications. Reactivation of VZV results in herpes zoster (HZ), also called shingles.<sup>2 3</sup> Over 95% of individuals will have acquired VZV during their childhood or early adulthood.<sup>4 5</sup> Approximately one in three people will develop HZ during their life-time with the risk increasing sharply after the age of 50 years of age (YOA), leading to an estimated 5 HZ episodes per 1,000 people in the UK, each year.<sup>6-8</sup> Similar incidence rates were reported in other European countries and elsewhere.<sup>2 7</sup> Furthermore, results from observational studies suggest that HZ incidence has risen during the past decade in various countries and is predicted to continue to rise as the average age of the population increases.<sup>2 9 10</sup>

HZ tends to start with prodromal pain, followed by a dermatomal rash which is usually unilateral and develops typically over the trunk or face. Rash is often accompanied by severe pain. Skin lesions and pain usually disappear completely within 4–6 weeks. Postherpetic neuralgia (PHN), often defined as pain persisting or appearing 30 to 90 days after rash onset, is the most common complication which can last from several weeks to months.<sup>8 11</sup> Even though mortality due to HZ infection is low, HZ greatly affects quality of life (QoL) in terms of physical and social functioning and the well-being of the patients.<sup>12</sup> Furthermore, severity of pain strongly correlates with the reported QoL.<sup>11 13</sup> Current treatment options, which mainly rely on antivirals, analgesics and antidepressants, provide only partial symptomatic relief and limited protection against the development of PHN and other complications. Thus, the impact of the disease on patients QoL is not adequately managed with existing interventions.<sup>11</sup>

In the UK, the Joint Committee on Vaccination and Immunisation (JCVI) recommended universal mass vaccination (UMV) for HZ using Zoster Vaccine Live (ZVL; *Zostavax*)<sup>14</sup>, the only vaccine available at the time the UMV programme was introduced in 2013. ZVL is a live-attenuated virus vaccine indicated for the prevention of HZ and, in Europe, of PHN in individuals  $\geq 50$  YOA.<sup>15</sup> Vaccine efficacy (VE) against HZ ( $VE_{HZ}$ ) of ZVL in the shingles prevention study (SPS) was 63.9% in individuals 60-69 YOA and 37.6% in individuals  $\geq 70$  YOA.<sup>15 16</sup> Long-term clinical trial data and observational effectiveness studies showed that VE of ZVL decreased substantially over time conferring little or no protection against HZ beyond 8 years after vaccination.<sup>17 18</sup>

1  
2  
3  
4 Even though ZVL is indicated in individuals  $\geq 50$  YOA, the JCVI recommended  
5 vaccination with ZVL at 70 YOA (and a catch-up vaccination for people 78 YOA), based  
6 on clinical trial data and an economic model showing that vaccination at 70 YOA would  
7 be the most cost-effective option given that the burden of disease increases with age,  
8 while VE of ZVL decreases in older individuals and over time.<sup>3 14</sup> A further limitation to  
9 the indicated use of ZVL in individuals  $\geq 50$  YOA is its contraindication in primary or  
10 acquired immunodeficiency states due to blood disorders or other types of cancer,  
11 infection with human immunodeficiency virus, or due to high dose  
12 immunosuppressive therapy.<sup>15 19</sup> A proportion of individuals would therefore not be  
13 able to receive ZVL.<sup>20</sup>

14  
15  
16  
17  
18  
19  
20 A novel Adjuvanted Recombinant Zoster Vaccine (RZV, *Shingrix*) has been granted  
21 marketing authorisation by the European Medicines Agency (EMA) and is indicated for  
22 use in individuals  $\geq 50$  YOA. RZV is a non-live vaccine consisting of the VZV glycoprotein  
23 E (gE), a prominent antigen target of VZV-specific CD4+ T-cell immune responses, and  
24 AS01<sub>B</sub> adjuvant system, which boosts immunogenicity and duration of the immune  
25 response.<sup>21</sup> RZV is administered in two doses 2 to 6 months apart. Because RZV is a  
26 non-live vaccine, it is not contra-indicated in immunocompromised (IC) individuals.  
27 While at this point in time, there is only limited data available regarding the use of  
28 Shingrix in subjects with confirmed or suspected immunosuppressive or  
29 immunodeficient conditions, further studies are ongoing. As with other vaccines, the  
30 administration of Shingrix to immunocompromised subjects should be based on  
31 careful consideration of potential benefits and risks.<sup>22</sup> Two large, phase III trials, i.e.  
32 the Zoster Efficacy Studies in Adults 50 and 70 YOA or older [ZOE-50 (NCT01165177)  
33 and ZOE-70 (NCT01165229), respectively] demonstrated high VE<sub>HZ</sub> of RZV in all age-  
34 groups; VE<sub>HZ</sub> was 97.2% in individuals  $\geq 50$  YOA included in the ZOE-50 study and  
35 91.3% in individuals  $\geq 70$  YOA included in the ZOE-50 and ZOE-70 studies.<sup>23 24</sup> VE  
36 persisted over the four-year duration of the clinical trial.<sup>24</sup>

37  
38  
39  
40  
41  
42  
43  
44  
45  
46 The objective of this study is to explore the public health impact of introducing the  
47 RZV vaccine in the UK in the routine population 70 YOA. The effect of RZV and ZVL on  
48 HZ and PHN incidence, complications and health resource utilisation is compared to  
49 no vaccination. Different scenario analyses are carried out to assess the impact of first-  
50 dose RZV coverage and second-dose RZV compliance and to determine the optimal  
51 age for vaccination.  
52  
53  
54  
55  
56  
57  
58  
59  
60

## **METHODS**

### *PATIENT AND PUBLIC INVOLVEMENT*

Patients or public were not involved as the analysis is based on mathematical modeling.

### *MODEL STRUCTURE*

The ZOster ecoNomic Analysis (ZONA), a static multi-cohort Markov model previously developed using Microsoft Excel, was adapted to the UK setting. The economic model considers up to five various age cohorts that can transition between different health states, including no HZ, HZ, health states associated with complications of HZ (PHN and non-PHN complications) and death from HZ or natural causes.<sup>25</sup> Cycle length is set to one year and follows all subjects from the year of intervention over their remaining life-time. The model has three different arms, having the same yearly model structure: No vaccination, vaccination with RZV and vaccination with ZVL. Within the vaccine strategy, individuals can be fully compliant with the vaccine dosing schedule, only partially or not vaccinated at all (depending on the compliance rate). Further details regarding the model structure are reported in the Supplementary information (SI) Figure 1 and in Curran et al, 2017.<sup>25</sup>

### *MODEL INPUT PARAMETERS*

Wherever possible, UK-specific data were used. Efficacy data for RZV and ZVL were derived from pivotal clinical trials conducted for ZVL and RZV.<sup>16 23 24 26</sup> Both model structure and global inputs such as VE and waning were validated with an external expert panel (epidemiologists, clinicians and health economists with a background in HZ) in September 2016.

### *DEMOGRAPHICS*

Populations in the model are projected to 2018 values. The base-case population consisted of the routine vaccination cohort 70 YOA. Based on projections by the Office of National Statistics (ONS)<sup>27</sup>, the predicted population numbers in the routine cohort of 70 YOA is 722,616, in 2018. Different age cohorts were modelled for use in scenario analyses (Table 1).

All-cause mortality rates were derived from ONS data projected to the year 2018/2019

(SI Table 1).<sup>27</sup>

## *EPIDEMIOLOGY*

### *HZ INCIDENCE*

HZ incidence was derived from a recent UK Clinical Practice Research Datalink (CPRD) study, which assessed the incidence of HZ in immunocompetent (IC-free) and IC individuals between 2000 and 2012<sup>28</sup> (SI Table 2). The CPRD database study presents the most recent real-world data on HZ incidence and was therefore considered the most appropriate source for this parameter. The IC-free and IC population were matched by age, gender and location of general practitioner (GP) and the proportion of IC individuals was adjusted in the whole population to account for an increase in immunodeficiencies in older individuals. In the age-group 70-79 YOA, 35% of individuals had primary or acquired immunodeficiency and a subgroup of this IC population is contraindicated to receive ZVL. Incidence numbers were converted to annual probabilities of developing HZ (Table 1). Lower and upper ranges of probabilities for HZ incidence in the whole population were obtained from published data since it was not possible to derive it from the split IC and IC-free data set analysed in the CPRD study<sup>3</sup> (SI Table 3).

Incidence rate of recurrent HZ is assumed to be the same as the incidence of the initial event. This assumption is supported by published data which indicates that the incidence rates of initial and recurrent HZ events are similar.<sup>2 29 30</sup>

### *PHN PROBABILITY*

PHN is defined as pain appearing or persisting for more than 3 months after initiation of HZ. PHN incidence was derived from published data.<sup>8 31</sup> Gauthier et al. derived PHN incidence from the CPRD in the population excluding patients with underlying IC conditions using prescription medication records on top of PHN codes to identify these episodes. Forbes et al reported odds ratios of developing PHN for people with human immunodeficiency virus and hematopoietic stem cell transplantation compared to IC-free population and these data were used in combination with data reported by Gauthier et al. to model the proportion of PHN cases following an episode of HZ in the general population (Table 1, SI Table 4). As for HZ, the model assumes that the incidence of recurrent PHN is the same as for first-time PHN.



### *HZ-RELATED MORTALITY*

Values for HZ-associated mortality are based on published literature<sup>32</sup> (SI Table 5). The study by Edmunds et al. was the only report including a granular breakdown of HZ case fatality rate by age-group in the UK and was therefore considered to be the most appropriate source for HZ-associated mortality. The published data are based on the population of England and Wales. However, increasing mortality with increasing age is consistent with observations from studies conducted in other countries<sup>33</sup> and it is assumed that these rates apply to the entire UK population.

### *NON-PHN COMPLICATIONS*

A wide range of complications other than PHN can occur in people experiencing an episode of HZ and could have a substantial impact on the burden of the disease. In the model, four main categories of complications were included, i.e., ocular, neurological, cutaneous and other non-pain complications. Probabilities of developing these complications after the initial HZ episodes were taken from published literature<sup>29</sup> (Table 1).

### *HOSPITALISATION AND GP VISITS DUE TO COMPLICATIONS*

The CPRD study was used to derive the proportion of patients being hospitalised or visiting their GP due to HZ-related complications.<sup>28</sup> Hospitalisation rates were higher in the IC cohort for all age-groups. In addition, health-care resource use was higher in older adults (SI Tables 6 & 7).

### *VACCINE EFFICACY AND SAFETY*

#### *EFFICACY*

Vaccine efficacy against HZ and PHN ( $VE_{HZ}$  and  $VE_{PHN}$ , respectively) were derived from the SPS trial and the Zoster Efficacy and Safety Study (ZEST) for ZVL and from the ZOE-50 and ZOE-70 trials for RZV<sup>16 23 24 26</sup> (Table 1, SI Table 8). VE for RZV is based on a 2-dose schedule given 2 months apart. However, compliance with 2<sup>nd</sup> dose RZV is likely to be lower than 100%, as such there is a cohort of individuals who are only vaccinated with one dose. Therefore, efficacy data for 1-dose RZV were analysed post-hoc based on limited clinical data from individuals in the ZOE trials receiving only 1-dose RZV.<sup>25</sup>

Waning for both vaccines was modelled by linear fitting, using data from the above-

mentioned trials as well as from the long-term persistence study (LTPS) for ZVL.<sup>25</sup> For RZV, waning rates were assumed to be 1% (range: 0%, 2.6%) during the first 4 years after vaccination and 2.3% (range: 0.7%, 4.6%) thereafter in individuals < 70 YOA. In the population ≥ 70 YOA, waning rate was assumed to be constant over time at 3.6% (range: 1.4%, 6.6%).<sup>25</sup> For ZVL, the model indicated a waning rate of 5.4% (range: 4.5%, 6.4%) during the first 4 years after vaccination and 5.1% (range: 4.1%, 6.0%) thereafter in all age-groups<sup>17 25</sup> (SI Table 9).

### COVERAGE AND COMPLIANCE

In the base-case analysis, coverage is set at 48.3% in line with latest coverage numbers for the UK.<sup>20</sup> The impact of different coverage rates was assessed in sensitivity analyses. Compliance with the second-dose of RZV was set to 70%.

### OUTCOMES

The model was used to estimate the avoidance of HZ and PHN cases, complications, deaths, GP visits and hospitalisations cases, complications due to HZ, HZ-related deaths and number of GP visits and hospitalisations for three different vaccination strategies, i.e., vaccination with RZV, vaccination with ZVL and no vaccination.

The number needed to vaccinate (NNV) to avert one case of HZ and PHN was also evaluated by applying the following calculation:

$$NNV = \frac{1}{\left(\frac{\text{control cases}}{\text{vaccinated persons}}\right) - \left(\frac{\text{vaccinated cases}}{\text{vaccinated persons}}\right)}$$

### SCENARIO ANALYSES

Different scenario analyses were carried out where assumptions regarding vaccination coverage and compliance and age at vaccination were changed.

In a first scenario analysis, the impact of increasing coverage of RZV to 70% was explored. A higher coverage of 70% in the UK was deemed plausible considering that a) the influenza vaccine uptake in people ≥ 65 YOA was 70.5% in 2016/2017<sup>34</sup> and b) in the absence of a contraindication, vaccinators might not hesitate to administer the vaccine in IC individuals.

In a second scenario analysis, the second-dose compliance was varied, assuming a

1  
2  
3 lower limit of 60% and an upper limit of 89% reflecting the lowest 10<sup>th</sup> percentile of  
4 the clinical trial second-dose compliance.<sup>25</sup>  
5  
6

7 Finally, the impact of changing the vaccination age on health outcomes was explored.  
8 VE is in general higher in younger individuals favouring early vaccination. On the other  
9 hand, duration of protection decreases over time and burden of disease (severity and  
10 duration of HZ and PHN) is higher in older individuals, favouring vaccination at an older  
11 age.<sup>35</sup> The relative balance of these factors may be different in case of ZVL and RZV,  
12 leading to different conclusions regarding optimal vaccination age.  
13  
14  
15  
16

## 17 *SENSITIVITY ANALYSES*

18  
19  
20 Deterministic sensitivity analyses (DSA) were conducted to test the robustness of the  
21 results subject to changes in input parameters. To this aim, HZ and PHN incidence  
22 rates, VE and waning rates for both vaccines, incidence rate of HZ-related  
23 complications and vaccine-related adverse events, coverage and second-dose  
24 compliance were varied in one-way sensitivity analyses according to pre-defined  
25 ranges. Tornado diagrams were used to illustrate parameters that had the largest  
26 impact on HZ cases avoided.  
27  
28  
29  
30

31  
32 Probabilistic sensitivity analysis (PSA) was carried out to assess the variability of results  
33 when changing parameters concomitantly using Monte Carlo simulation (5,000  
34 simulations). Each parameter could be attributed a value within its predefined range  
35 and according to the assigned probability distribution. A beta-distribution was used  
36 for all parameters except for vaccine coverage which followed a uniform distribution.  
37 Age-specific incidence parameters which varied across age-groups were assumed to  
38 be correlated using a correlation of 0.5. The results of the PSA are presented using a  
39 histogram displaying the HZ cases avoided with RZV compared with ZVL.  
40  
41  
42  
43  
44

## 45 *RESULTS*

### 46 *BASE-CASE ANALYSIS*

47  
48  
49 In the base-case scenario (cohort 70 YOA) RZV reduced the number of HZ and PHN  
50 cases by 30,262 and 5,409, respectively, compared to no vaccination. ZVL led to a  
51 reduction of 7,909 HZ and 3,567 PHN cases (Table 2). Vaccination with RZV reduced  
52 the number of HZ-related complications and the health-resource use (Table 2). There  
53 were few HZ-related deaths; compared to no vaccination, RZV prevented 8 HZ-related  
54  
55  
56  
57  
58  
59  
60

1  
2  
3  
4 deaths while ZVL prevented none. The NNV to prevent one case of HZ was 12 with RZV  
5 and 45 with ZVL. The NNV to avoid one case of PHN was 65 with RZV and 98 with ZVL,  
6 respectively.  
7

### 8 9 *SCENARIO ANALYSES*

10  
11 In a first scenario analysis, we increased coverage from 48.3% to 70% for RZV. In this  
12 scenario, an additional 13,596 HZ and 2,430 PHN cases would be prevented in the  
13 routine vaccination cohort (70 YOA) (Figure 1, light blue bar showing the additional  
14 proportion of HZ and PHN cases avoided with RZV compared to no vaccination).  
15  
16

17  
18 In a second scenario analysis, compliance with second-dose of RZV was set to lower  
19 and upper limits of 60% and 89%. Compared to no vaccination, the numbers of HZ  
20 cases avoided with RZV were 28,145 and 34,284 at the lower and upper limits for  
21 compliance, respectively (Figure 2).  
22  
23

24  
25 To determine the optimal age for vaccination, scenario analyses were carried out to  
26 evaluate the public health impact in different age cohorts (50, 60, 65, 70 and 80 YOA)  
27 in terms of NNV, HZ and PHN cases avoided and resource utilisation per 100,000  
28 people.  
29  
30

31  
32 In case of RZV, the scenario that led to avoidance of the most HZ cases per 100,000  
33 people would be vaccinating at 60 YOA, while slightly more PHN cases per 100,000  
34 people could be avoided by vaccinating at 65 YOA. In case of ZVL, the number of HZ  
35 cases avoided per 100,000 people would be highest in the 65 YOA cohort, but more  
36 PHN cases per 100,000 people would be avoided in the 70 YOA cohort (Figure 3). In all  
37 age-groups, number of HZ and PHN cases avoided per 100,000 people was higher for  
38 RZV compared to ZVL. Complications avoided ranged from 689 with RZV and 250 with  
39 ZVL in the 65 YOA cohort, to 434 with RZV and 46 with ZVL in the 80 YOA cohort.  
40  
41

42  
43 Consistent with these results, for RZV, the NNV to avoid one case of HZ was lowest in  
44 the 60 YOA (NNV = 9) and the NNV to avoid one case of PHN was lowest in the 65 YOA  
45 cohort (NNV = 54) (Table 3).  
46  
47

48  
49 The higher number of HZ and PHN cases avoided with RZV compared to ZVL across all  
50 age cohorts leads to an important reduction in the use of health care resources, which  
51 might be an indicator of a reduction in direct costs due to HZ (Table 4). The number of  
52 GP visits per 100,000 people avoided is highest for the 60 YOA and 65 YOA cohorts for  
53 both vaccines, and consistently higher for RZV compared to ZVL. The number of  
54  
55  
56  
57  
58  
59  
60

1  
2  
3  
4 hospitalisations avoided increases with increasing age for RZV, reflecting the increased  
5 risk of hospitalisation due to HZ in older individuals.  
6

### 7 8 *SENSITIVITY ANALYSES* 9

10 In DSA analyses carried out for the base-case scenario in the age-cohort 70 YOA, the  
11 robustness of results was tested by changing input parameters to their lower and  
12 upper estimated confidence ranges (SI Tables 3 – 5; SI Tables 8 – 9). In the base case  
13 analyses, RZV prevented an additional 22,353 HZ cases as compared to ZVL. The  
14 parameter with the highest impact on the relative advantage of RZV over ZVL was  
15 annual waning of RZV (2 doses)  $VE_{HZ}$  in people  $\geq 70$  YOA, although the highest waning  
16 for RZV would still lead to a reduction of over 13,000 HZ cases compared to ZVL. Other  
17 parameters influencing the number of HZ cases avoided include initial  $VE_{HZ}$  in people  
18  $\geq 70$  YOA for ZVL and RZV single dose, HZ incidence, and RZV compliance to second-  
19 dose (Figure 4).  
20  
21  
22  
23  
24

25  
26 During PSA, all parameters were varied simultaneously along their predefined ranges.  
27 In all simulations ( $n = 5,000$ ), RZV led to a reduction of HZ cases as compared to ZVL.  
28 The distribution of the number of HZ cases avoided by RZV relative to ZVL is shown in  
29 Figure 5. Overall, 83.1% of simulations predicted that RZV would prevent at least  
30 15,000 additional HZ cases compared with ZVL in the age-group 70 YOA.  
31  
32  
33  
34

### 35 **DISCUSSION** 36

37  
38 UMV against HZ using ZVL was introduced in the UK in 2013 and observational studies  
39 suggest that the programme has brought down HZ incidence by approximately one  
40 third in the vaccinated cohorts.<sup>36 37</sup> RZV has been approved by the EMA in individuals  
41  $\geq 50$  YOA, thereby offering an alternative option to vaccinate people against HZ in  
42 addition to the existing ZVL. The aim of this study was to evaluate the public health  
43 impact of RZV in terms of HZ prevention compared to ZVL or no vaccination in the UK  
44 setting.  
45  
46  
47  
48

49 In the base-case considering the current vaccination cohort of people 70 YOA, RZV  
50 reduced the number of HZ and PHN cases by 30,262 and 5,409 compared to no  
51 vaccination. In comparison, ZVL prevented 7,909 HZ and 3,567 PHN cases as compared  
52 to no vaccination. NNV to prevent one episode of HZ was almost four times lower with  
53 RZV compared to ZVL, i.e., 12 with RZV vs 45 with ZVL. In addition, the estimated  
54 number of hospitalisations and GP visits due to HZ and PHN were substantially lower  
55  
56  
57  
58  
59  
60

1  
2  
3  
4 with RZV compared with HZ. HZ-related mortality is in general low; nevertheless, our  
5 simulations predicted that 8 deaths could be prevented with an RZV vaccination  
6 strategy while no HZ-related deaths were prevented adopting a ZVL vaccination  
7 strategy.  
8  
9

10 Results were robust under deterministic and probabilistic sensitivity analyses. Annual  
11 waning of RZV VE in people  $\geq 70$  YOA had the greatest impact on the number of HZ  
12 avoided relative to ZVL, but even assuming an extreme assumption on waning, with  
13 an annual waning rate of 6.6%, RZV would prevent an additional 13,816 HZ cases as  
14 compared to ZVL. Other parameters to which the relative vaccination strategies  
15 proved sensitive included annual HZ incidence and  $VE_{HZ}$  of RZV and ZVL. Probabilistic  
16 sensitivity analyses were always in favour of the RZV vaccination strategy with 83.1%  
17 of simulations showing a reduction of at least  $\geq 15,000$  HZ cases with respect to ZVL.  
18 We also tested different scenarios in which coverage and compliance were varied,  
19 assuming that the public health impact would increase as a greater proportion of  
20 individuals would be vaccinated. Increasing the coverage estimate of the first-dose of  
21 RZV from 48.3% to 70% would further reduce HZ and PHN incidence thereby leading  
22 to a greater reduction in healthcare resources used. We hypothesise that the coverage  
23 with RZV might be higher because a proportion of the eligible individuals are currently  
24 not receiving the vaccine with ZVL. Even though the proportion of individuals with a  
25 true contraindication to ZVL is estimated to be small (2.8%<sup>20</sup>) HZ vaccination with ZVL  
26 might be withheld even in those IC individuals who have no contraindications as  
27 vaccinators may have been risk averse. Reducing RZV compliance to 60%, RZV would  
28 still prevent approximately three times more HZ cases compared to ZVL. This is in line  
29 with a recent public health impact study carried out for the German setting where a  
30 compliance rate of 50% would still lead to an improvement of 200% over ZVL in terms  
31 of HZ prevention.<sup>25</sup> Although results are in line with the German study, this UK model  
32 adaptation has some different methodological considerations that are of importance  
33 to potential decision-making bodies. Firstly, this manuscript also assesses single year  
34 cohorts versus multiple year cohorts. This was chosen to reflect the current HZ  
35 vaccination programme in the UK where people get vaccinated with ZVL at 70 YOA  
36 and 79 YOA within the catch-up programme. Secondly, the HZ incidence is calculated  
37 based upon a weighting method of IC-free and IC populations using the prevalence of  
38 IC in the different age groups. This is important to estimate the actual HZ incidence in  
39 the general population.  
40  
41  
42  
43  
44  
45  
46  
47  
48  
49  
50  
51  
52  
53  
54  
55

56 The recommended vaccination strategy was based on the clinical profile of ZVL, the  
57  
58  
59  
60

1  
2  
3  
4 only vaccine available at the time. In its recommendation, the JCVI noted that ZVL VE  
5 decreases with increasing age and over time; hence, the current age cohort eligible  
6 for vaccination, i.e., individuals 70 YOA, is a compromise to optimise limited efficacy  
7 and duration of protection against HZ. The JCVI also stated that optimal age at  
8 vaccination would depend on the characteristics of any given vaccine.<sup>38</sup> Therefore, the  
9 impact of vaccination age on HZ and PHN incidence was explored through scenario  
10 analyses including different age-cohorts (50, 60, 65, 70 and 80 YOA). The number of  
11 HZ and PHN cases avoided per 100,000 people was higher with RZV than with ZVL  
12 across all age cohorts. In case of RZV, most HZ cases were avoided in the 60 YOA  
13 cohort, while PHN case avoidance was highest in the 65 YOA cohort. This observation  
14 is consistent with a higher probability of developing PHN at an increased age. On the  
15 other hand, the projected number of PHN cases avoided with ZVL was highest in the  
16 70 YOA. This finding is due to a top-up efficacy seen with ZVL against PHN in the  
17 population  $\geq 70$  YOA: vaccinated individuals with breakthrough HZ are at a lower risk  
18 of developing PHN as compared to unvaccinated individuals with HZ. In the individuals  
19  $< 70$  YOA, no additional protection against PHN was observed in clinical studies with  
20 ZVL. For RZV no additional top-up efficacy could be calculated based on the limited  
21 number of breakthrough cases, and thus  $VE_{HZ}$  and  $VE_{PHN}$  were assumed to be the  
22 same. As a result, for RZV, the NNV to avoid one case of HZ and PHN was lowest for  
23 the 60 YOA and 65 YOA cohorts. NNV increased in the 70 YOA and more so in the 80  
24 YOA, where a proportion of the simulated cohort died due to natural causes before  
25 any health benefit of vaccination occurred.

26  
27  
28  
29  
30  
31  
32  
33  
34  
35  
36  
37 From a health care utilisation perspective, RZV reduced the number of GP visits by  
38 more than 13,000 compared to ZVL in all age-groups. The highest reduction in GP visits  
39 was predicted in the 65 YOA cohort, while the largest impact on hospitalisations was  
40 predicted in the 80 YOA cohort. The latter might be explained by the higher risk of  
41 hospitalisation inherent to older individuals due to a higher degree of frailty.  
42 Nevertheless, it should be noted that the reduction in hospitalisations was predicted  
43 to be several-fold higher with RZV compared to ZVL in all age-cohorts. Reduction  
44 in the use of health care resources is a good indicator of potential decrease in direct  
45 costs of new health care interventions; however, this requires further investigation in  
46 a cost-effectiveness analysis with RZV in the UK context.

47  
48  
49  
50  
51  
52  
53 The potential public health impact of RZV in the UK setting has previously been studied  
54 by our group.<sup>39</sup> The study showed a substantial reduction in HZ and PHN cases  
55 compared to no vaccination; however, no comparison was made to ZVL. A number of  
56  
57  
58  
59  
60

1  
2  
3  
4 studies have evaluated the impact of ZVL on disease burden and associated cost-  
5 effectiveness in the UK setting. Van Hoek et al. analysed cost-effectiveness of ZVL in  
6 different age-groups with the base-case considering a cohort of immunocompetent  
7 65-year-old individuals in the UK. This cohort was modelled over a life-time and a  
8 vaccine coverage of 73.5%.<sup>3</sup> Waning rates might have been underestimated in this  
9 model since long-term data from the LTPS study for persistence of efficacy of the ZVL  
10 vaccination were not yet taken into account.<sup>25</sup> The LTPS study showed that  $VE_{HZ}$  of ZVL  
11 decreases significantly over time with no statistically significant protection observed  
12 after 8 years of vaccination.<sup>17 18</sup> In the economic model published by Moore et al., the  
13 NNV of ZVL to prevent one case of HZ was 15, and hence lower than that found in our  
14 simulations. However, the authors assumed a waning rate of 0%.<sup>10</sup>

20  
21 The public health impact of RZV was also evaluated for other settings, including  
22 Germany, US, Canada and Australia. These studies used a wide range of assumptions  
23 regarding coverage, compliance and duration of vaccine protection for both RZV and  
24 ZVL.<sup>28 40-42</sup> Despite differences in these assumptions, all studies showed a consistent  
25 improvement in the reduction of HZ cases and its complications compared to no  
26 vaccination or vaccination with ZVL. In a recent independent cost-effectiveness study  
27 for the US setting, employing conservative assumptions regarding RZV waning rate,  
28 coverage and compliance, the authors concluded that RZV was more effective  
29 compared to ZVL under the vast majority of assumptions evaluated.<sup>40</sup>

30  
31  
32  
33  
34  
35  
36 As with every model, there are strengths and limitations associated with the modelling  
37 strategy employed. For RZV, most recent UK-specific data available at the time we  
38 conducted this study were used; for HZ incidence the CPRD database, a large UK-  
39 specific database, was analysed and values for both IC and non-IC cohorts were  
40 combined.<sup>28 43</sup> For PHN incidence, published data from two reports were used to  
41 estimate the PHN probability in the total population including individuals with  
42 immunodeficient states. The estimates of PHN cases prevented are close to real  
43 values, validating our approach. Demographic data projected to the year 2018 were  
44 used based on numbers reported by the ONS.<sup>27</sup> The limitations in this study are related  
45 to assumptions that had to be made in the absence of real-world data, including  
46 coverage with RZV, compliance and long-term waning for RZV. Coverage and  
47 compliance were set to values observed in comparable vaccination programs and  
48 these parameters were varied in scenario and one-way sensitivity analyses. Results  
49 from long-term studies with RZV are still outstanding and follow-up data is currently  
50 limited to 4 years. However, the model has been developed such that it can be  
51  
52  
53  
54  
55  
56  
57  
58  
59  
60



1  
2  
3 updated once additional data becomes available. For ZVL waning rates, we included  
4 both data from the SPS and the LTPS study<sup>25</sup> to ensure that we could compare ZVL  
5 and RZV in the ZONA model. Recent observational studies looking into the vaccine  
6 effectiveness of ZVL show that the vaccine wanes rapidly and has little to no protection  
7 left beyond year 8 after vaccination.<sup>18 37</sup> Finally, the rate of HZ-associated  
8 complications was assumed to be the same in all individuals with HZ regardless of their  
9 vaccination status. This assumption ignores the potential benefit vaccination might  
10 have by lowering the severity and duration of break-through HZ cases. Clinical trial  
11 data suggest that  $VE_{HZ}$  and  $VE_{PHN}$  are similar and there is some evidence that duration  
12 and severity of HZ/PHN pain is lower in individuals having received RZV as compared  
13 to unvaccinated individuals.<sup>44</sup>

20  
21 Future research might be directed towards assessing severity and duration of HZ and  
22 PHN cases depending on vaccination status, identifying subgroups of the population  
23 that may have enhanced benefit from the vaccine and evaluating cost-effectiveness  
24 in the current UMV cohort and across different age-cohorts.

25  
26 A lay language summary contextualizing the outcomes and potential impact of this  
27 study for healthcare providers is displayed in Figure 6.

## 34 **CONCLUSION**

35  
36  
37 Within the model assumptions, RZV has the greater public health impact in terms of  
38 HZ and PHN case avoidance and reduction in health care utilisation. When the UMV  
39 was introduced in 2013, vaccinating people at 70 YOA was the best option based on  
40 the vaccine characteristics of ZVL. With the approval of RZV in the US, Canada, Japan  
41 and Europe in adults  $\geq 50$  YOA the optimal HZ prevention strategy needs to be re-  
42 evaluated. The model projects for RZV a longer duration of protection and the VE  
43 remains high in older age groups compared to ZVL. Therefore, the results of this model  
44 show that the difference in clinical profile of RZV leads to a different optimal age of  
45 vaccination. Vaccinating the UK population with RZV at 60 YOA or 65 YOA is the  
46 optimal vaccination strategy in terms of public health impact, while being superior to  
47 ZVL in all age cohorts studied.

## ***ACKNOWLEDGEMENTS***

Authors would like to Lijoy Varghese for this contribution to the study. They also want to thank Business & Decision Life Sciences platform for editorial assistance and publications coordination, on behalf of GSK. Stephanie Garcia coordinated manuscript development and editorial support. Katrin Spiegel provided writing support.

## REFERENCES

1. Mueller NH, Gilden DH, Cohrs RJ, et al. Varicella zoster virus infection: clinical features, molecular pathogenesis of disease, and latency. *Neurol Clin* 2008;**26**(3):675-97. doi:10.1016/j.ncl.2008.03.011.
2. Kawai K, Gebremeskel BG, Acosta CJ. Systematic review of incidence and complications of herpes zoster: Towards a global perspective. *BMJ Open* 2014;**4**:e004833. doi:10.1136/bmjopen-2014-004833
3. van Hoek AJ, Gay N, Melegaro A, et al. Estimating the cost-effectiveness of vaccination against herpes zoster in England and Wales. *Vaccine* 2009;**27**(9):1454-67. doi:10.1016/j.vaccine.2008.12.024
4. Johnson RW, Alvarez-Pasquin M-J, Bijl M, et al. Herpes zoster epidemiology, management, and disease and economic burden in Europe: a multidisciplinary perspective. *Therapeutic Advances in Vaccines* 2015;**3**(4):109-20. doi:10.1177/2051013615599151
5. Bollaerts K, Riera-Montes M, Heininger U, et al. A systematic review of varicella seroprevalence in European countries before universal childhood immunization: deriving incidence from seroprevalence data. *Epidemiol Infect* 2017;**145**(13):2666-77. doi:10.1017/S0950268817001546
6. Brisson M, Edmunds WJ, Law B, et al. Epidemiology of varicella zoster virus infection in Canada and the United Kingdom. *Epidemiol Infect* 2001;**127**:305-14. doi:10.1017/S0950268801005921
7. Pinchinat S, Cebrián-Cuenca AM, Bricout H, et al. Similar herpes zoster incidence across Europe: Results from a systematic literature review. *BMC Infect Dis* 2013;**13**:170. doi:10.1186/1471-2334-13-170
8. Gauthier A, Breuer J, Carrington D, et al. Epidemiology and cost of herpes zoster and post-herpetic neuralgia in the United Kingdom. *Epidemiol Infect* 2009;**137**(1):38-47. doi:10.1017/S0950268808000678
9. Varghese L, Standaert B, Olivieri A, et al. The temporal impact of aging on the burden of herpes zoster. *BMC Geriatr* 2017;**17**:30. doi:10.1186/s12877-017-0420-9
10. Moore L, Remy V, Martin M, et al. A health economic model for evaluating a vaccine for the prevention of herpes zoster and post-herpetic neuralgia in the UK. *Cost effectiveness and resource allocation : C/E* 2010;**8**:7-7. doi:10.1186/1478-7547-8-7
11. Gater A, Abetz-Webb L, Carroll S, et al. Burden of herpes zoster in the UK: Findings from the zoster quality of life (ZQOL) study. *BMC Infect Dis* 2014;**14**:402. doi:10.1186/1471-2334-14-402
12. Drolet M, Brisson M, Schmader KE, et al. The impact of herpes zoster and postherpetic neuralgia on health-related quality of life: A prospective study. *CMAJ* 2010;**182**(16):1731-36. doi:10.1503/cmaj.091711
13. Schmader KE, Sloane R, Pieper C, et al. The impact of acute herpes zoster pain and discomfort on functional status and quality of life in older adults. *The Clinical journal of pain* 2007;**23**(6):490-6. doi:10.1097/AJP.0b013e318065b6c9
14. Joint Committee on Vaccination and Immunisation. Joint Committee on Vaccination and Immunisation Statement on varicella and herpes zoster vaccines. available from: <http://webarchive.nationalarchives.gov.uk/20120907151317/http://www.dh.gov>

- v.uk/prod\_consum\_dh/groups/dh\_digitalassets/@dh/@ab/documents/digitalasset/dh\_133599.pdf [accessed June 26, 2018].
15. Merck Sharp Dohme Ltd. Zostavax Summary of Product Characteristics (SmPC). available from: <https://www.medicines.org.uk/emc/product/6101/smcp> [accessed June 26, 2018].
  16. Oxman MN, Levin MJ, Johnson GR, et al. A vaccine to prevent herpes zoster and postherpetic neuralgia in older adults. *NEnglJMed* 2012;**366**(20):1859-69. doi:10.1056/NEJMoA1208410
  17. Morrison VA, Johnson GR, Schmader KE, et al. Long-term persistence of zoster vaccine efficacy. *Clin Infect Dis* 2015;**60**(6):900-09. doi:10.1093/cid/ciu918
  18. Tseng HF, Harpaz R, Luo Y, et al. Declining Effectiveness of Herpes Zoster Vaccine in Adults Aged  $\geq 60$  Years. *J Infect Dis* 2016;**213**(12):1872-75. doi:10.1093/infdis/jiw047
  19. Public Health England. Shingles (herpes zoster), 2016:Chapter 28a.
  20. Public Health England. Herpes zoster ( shingles ) immunisation programme : September 2016 to August 2017 Report for England. available from: [https://assets.publishing.service.gov.uk/government/uploads/system/uploads/attachment\\_data/file/667636/Annual\\_shingles\\_report\\_2016-2017\\_.pdf](https://assets.publishing.service.gov.uk/government/uploads/system/uploads/attachment_data/file/667636/Annual_shingles_report_2016-2017_.pdf) [accessed June 26, 2018].
  21. Chlibek R, Pauksens K, Rombo L, et al. Long-term immunogenicity and safety of an investigational herpes zoster subunit vaccine in older adults. *Vaccine* 2016;**34**(6):863-68. doi:10.1016/j.vaccine.2015.09.073
  22. GlaxoSmithKline Biologicals SA. Shingrix Summary of Product Characteristics (SmPC). available from: [http://www.ema.europa.eu/docs/en\\_GB/document\\_library/EPAR\\_-\\_Product\\_Information/human/004336/WC500246550.pdf](http://www.ema.europa.eu/docs/en_GB/document_library/EPAR_-_Product_Information/human/004336/WC500246550.pdf) [accessed June 26, 2018].
  23. Lal H, Cunningham AL, Godeaux O, et al. Efficacy of an Adjuvanted Herpes Zoster Subunit Vaccine in Older Adults. *N Engl J Med* 2015;**372**(22):2087-96. doi:10.1056/NEJMoA1501184
  24. Cunningham AL, Lal H, Kovac M, et al. Efficacy of the Herpes Zoster Subunit Vaccine in Adults 70 Years of Age or Older. *N Engl J Med* 2016;**375**(11):1019-32. doi:10.1056/NEJMoA1603800
  25. Curran D, Van Oorschot D, Varghese L, et al. Assessment of the potential public health impact of Herpes Zoster vaccination in Germany. *Hum Vaccin Immunother* 2017;**13**(10):2213-21. doi:10.1080/21645515.2017.1345399
  26. Schmader KE, Levin MJ, Gnann JW, et al. Efficacy, safety, and tolerability of herpes zoster vaccine in persons aged 50-59 years. *Clin Infect Dis* 2012;**54**(7):922-28. doi:10.1093/cid/cir970
  27. Office of National Statistics. 2014 based National population projections. available from: <https://www.ons.gov.uk/file?uri=/peoplepopulationandcommunity/populationandmigration/populationprojections/datasets/localauthoritiesinenglandtable2/2014based/table2.xls> [accessed June 13, 2018].
  28. Yanni EA, Ferreira G, Guennec M, et al. Burden of herpes zoster in 16 selected immunocompromised populations in England: a cohort study in the Clinical Practice Research Datalink 2000–2012. *BMJ Open* 2018;**8**(6). doi:10.1136/bmjopen-2017-020528

- 1
  - 2
  - 3
  - 4
  - 5
  - 6
  - 7
  - 8
  - 9
  - 10
  - 11
  - 12
  - 13
  - 14
  - 15
  - 16
  - 17
  - 18
  - 19
  - 20
  - 21
  - 22
  - 23
  - 24
  - 25
  - 26
  - 27
  - 28
  - 29
  - 30
  - 31
  - 32
  - 33
  - 34
  - 35
  - 36
  - 37
  - 38
  - 39
  - 40
  - 41
  - 42
  - 43
  - 44
  - 45
  - 46
  - 47
  - 48
  - 49
  - 50
  - 51
  - 52
  - 53
  - 54
  - 55
  - 56
  - 57
  - 58
  - 59
  - 60
29. Yawn BP, Saddier P, Wollan PC, et al. A population-based study of the incidence and complication rates of herpes zoster before zoster vaccine introduction. *Mayo Clin Proc* 2007;**82**(11):1341-9.
30. Yawn BP, Wollan PC, Kurland MJ, et al. Herpes Zoster Recurrences More Frequent Than Previously Reported. *Mayo Clin Proc* 2011;**86**(2):88-93. doi:10.4065/mcp.2010.0618
31. Forbes HJ, Thomas SL, Smeeth L, et al. A systematic review and meta-analysis of risk factors for postherpetic neuralgia. *Pain* 2016;**157**(1):30-54. doi:10.1097/j.pain.0000000000000307
32. Edmunds WJ, Brisson M, Rose JD. The epidemiology of herpes zoster and potential cost-effectiveness of vaccination in England and Wales. *Vaccine* 2001;**19**(23-24):3076-90. doi:10.1016/S0264-410X(01)00044-5
33. Bricout H, Haugh M, Olatunde O, et al. Herpes zoster-associated mortality in Europe: A systematic review. *BMC Public Health* 2015;**15**(1):466. doi:10.1186/s12889-015-1753-y
34. Public Health England. Influenza: the green book, chapter 19. available from: [https://assets.publishing.service.gov.uk/government/uploads/system/uploads/attachment\\_data/file/663694/Greenbook\\_chapter\\_19\\_Influenza\\_.pdf](https://assets.publishing.service.gov.uk/government/uploads/system/uploads/attachment_data/file/663694/Greenbook_chapter_19_Influenza_.pdf) [accessed June 29, 2018].
35. Sampathkumar P, Drage LA, Martin DP. Herpes zoster (Shingles) and postherpetic neuralgia. *Mayo Clin Proc* 2009;**84**(3):274-80. doi:10.4065/84.3.274
36. Amirhalingam GA, Nick. Keel, Philip. Mullett, David. Correa, Ana. de Lusignan, Simon. Ramsay, Mary. Evaluation of the effect of the herpes zoster vaccination programme 3 years after its introduction in England: a population-based study. *Lancet Public Health* 2018;**3**:e82-90. doi:10.1016/S2468-2667(17)30234-7
37. Walker JL, Andrews NJ, Amirhalingam G, et al. Effectiveness of herpes zoster vaccination in an older United Kingdom population. *Vaccine* 2018;**36**(17):2371-77. doi:10.1016/j.vaccine.2018.02.021
38. Joint Committee on Vaccination Immunisation. Minute of the meeting on 4 October 2017. available from: [https://www.jostrust.org.uk/sites/default/files/minute\\_2017\\_10\\_draft.pdf](https://www.jostrust.org.uk/sites/default/files/minute_2017_10_draft.pdf) <https://www.bmj.com/content/bmj/345/bmj.e6879.full.pdf> [accessed June 26, 2018].
39. Van Oorschoot D, Hunjan M, Varghese L, et al. The public health perspective of an investigational herpes zoster vaccine in the united kingdom (UK). *Value Health* 2016;**19**(7):A400-A00. doi:10.1016/j.jval.2016.09.309
40. Le P, Rothberg MB. Cost-effectiveness of the adjuvanted herpes zoster subunit vaccine in older adults. *JAMA Internal Medicine* 2018;**178**(2):248-58. doi:10.1001/jamainternmed.2017.7431
41. Varghese L, Curran D, Yan S, et al. Estimating the Potential Public Health Impact of Introducing the HZ/su Vaccine in the US Population Aged  $\geq 50$  Years. *Open Forum Infectious Diseases* 2015;**2**(suppl\_1). doi:10.1093/ofid/ofv133.1477
42. Varghese L, Nissen M, Olivieri A, et al. Public health perspective of phase III results of an investigational Herpes Zoster vaccine. Public Health Association of Australia. *Public Health Association of Australia - Communicable Disease Control Conference*, Brisbane 2015:42. <https://www.phaa.net.au/documents/item/581> (accessed June 26, 2018).
43. Curran D, Hunjan M, El Ghachi A, et al. Herpes Zoster Related Healthcare Burden And Costs In Both Immunocompromised (IC) And IC-Free Populations In The

- 1  
2  
3 United Kingdom. *Value Health* 2017;**20**(9):A786.  
4 doi:10.1016/j.jval.2017.08.2296  
5  
6 44. Curran D, Athan E, Diez-Domingo J, et al. Quality-of-Life Impact of an  
7 Investigational Subunit-Adjuvanted Herpes Zoster Vaccine in Adults  $\geq 50$  Years  
8 of Age. *Open Forum Infectious Diseases* 2016;**3**(suppl\_1).  
9 doi:10.1093/ofid/ofw194.77  
10  
11  
12  
13  
14  
15  
16  
17  
18  
19  
20  
21  
22  
23  
24  
25  
26  
27  
28  
29  
30  
31  
32  
33  
34  
35  
36  
37  
38  
39  
40  
41  
42  
43  
44  
45  
46  
47  
48  
49  
50  
51  
52  
53  
54  
55  
56  
57  
58  
59  
60

## ***FOOTNOTES***

### ***TRADEMARK***

Shingrix is a trademark of the GSK group of companies.

Zostavax is a trademark from Merck Sharp & Dohme Corp.

### ***AUTHORS' CONTRIBUTION***

DVO, DC, SL, BB participated to the conception and design of the analysis; DVO, DC, MH developed and adapted the model; DVO, DC, MH, HSC, BB were involved in the collection, analysis and/or interpretation of the data. All authors had full access to the data and approved the final version of the paper for submission.

### ***CONFLICTS OF INTEREST***

DVO, MH, BB, DC and HSC are employees of the GSK group of companies. MH, DC, and HSC hold shares in the GSK group of companies. SL is a freelance consultant working on behalf of the GSK group of companies.

### ***DATA SHARING STATEMENT***

All data used in this study are presented in the manuscript, references to the original material are provided. Please contact the corresponding author shall you require any additional information.

### ***ETHICAL APPROVAL***

Ethical approval is not applicable for this public health impact modelling analysis.

### ***FUNDING SECTION***

GlaxoSmithKline Biologicals SA funded this study (GSK study identifier: HO-17-18511) and was involved in all stages of study conduct, including analysis of the data. GlaxoSmithKline Biologicals SA also covered all costs associated with the development and publication of this manuscript.

## TABLES AND FIGURES

**Table 1: Demographic, epidemiological and efficacy data according to age group**

| Age                                   |                | 50 YOA              | 60 YOA               | 65 YOA               | 70 YOA               | 80 YOA              |
|---------------------------------------|----------------|---------------------|----------------------|----------------------|----------------------|---------------------|
| Number of people in-age group in 2018 |                | 908,255             | 783,067              | 686,215              | 722,616              | 389,107             |
| HZ incidence per 1,000 individuals    | IC             | 6.85                | 8.80                 | 9.93                 | 11.32                | 12.61               |
|                                       | IC-Free        | 4.9                 | 6.92                 | 8.62                 | 11.04                | 11.02               |
| Proportion developing PHN (%)         |                | 11.42               | 13.89                | 15.71                | 17.12                | 20.42               |
| Non-PHN complications incidence (%)   | Ocular         | 2.87                | 3.82                 | 3.82                 | 4.14                 | 5.41                |
|                                       | Neurological   | 2.46                | 3.17                 | 3.17                 | 5.99                 | 4.23                |
|                                       | Cutaneous      | 1.74                | 1.05                 | 1.05                 | 2.09                 | 2.44                |
|                                       | Other          | 2.03                | 1.63                 | 1.63                 | 2.44                 | 2.85                |
| HZ - Vaccine Efficacy – % (Range)     | RZV<br>2 doses | 98.4<br>(95-100)    | 98.4<br>(95-100)     | 98.4<br>(95-100)     | 97.8<br>(94.1-100)   | 97.8<br>(94.1-100)  |
|                                       | RZV<br>1 dose  | 90.0<br>(58.9-98.9) | 90.0<br>(58.9-98.9)  | 90.0<br>(58.9-98.9)  | 69.5<br>(24.9-89.1)  | 69.5<br>(24.9-89.1) |
|                                       | ZVL            | 69.8<br>(54.1-80.6) | 63.9<br>(56.0-71.0)  | 63.9<br>(56.0-71.0)  | 40.85<br>(28.0-52.0) | 18.25<br>(0-48.0)   |
| PHN Vaccine Efficacy – % (Range)      | RZV<br>2 doses | 98.4<br>(95.0-100)  | 98.4<br>(95.0-100)   | 98.4<br>(95.0-100)   | 97.84<br>(94.1-100)  | 97.84<br>(94.1-100) |
|                                       | RZV<br>1 dose  | 90.0<br>(58.9-98.9) | 90.0<br>(58.9-98.9)  | 90.0<br>(58.9-98.9)  | 69.5<br>(24.9-89.1)  | 69.5<br>(24.9-89.1) |
|                                       | ZVL            | 69.8<br>(30.8-89.6) | 65.69<br>(25.4-84.2) | 65.69<br>(25.4-84.2) | 73.38<br>(51.6-85.8) | 39.51<br>(0-73.8)   |

HZ: herpes zoster; IC: immunocompromised; IC-free: immunocompetent; PHN: postherpetic neuralgia; RZV: adjuvanted recombinant zoster vaccine; YOA: years of age; ZVL: zoster vaccine live.



**Table 2: Health outcomes and health resource utilisation in the vaccination cohort 70 YOA - base-case analysis, N=722,616**

|                                 | <b>RZV</b> | <b>ZVL</b> | <b>No vaccination</b> | <b>RZV vs no vaccination</b> | <b>ZVL vs no vaccination</b> |
|---------------------------------|------------|------------|-----------------------|------------------------------|------------------------------|
| HZ cases, n                     | 88,643     | 110,996    | 118,905               | 30,262                       | 7,909                        |
| PHN cases, n                    | 16,570     | 18,411     | 21,979                | 5,409                        | 3,567                        |
| <b>HZ-related complications</b> |            |            |                       |                              |                              |
| Total, n                        | 13,109     | 16,405     | 17,565                | 4,455                        | 1,160                        |
| Ocular, n                       | 4,207      | 5,221      | 5,548                 | 1,341                        | 327                          |
| Neurological, n                 | 4,565      | 5,782      | 6,255                 | 1,691                        | 474                          |
| Cutaneous, n                    | 2,001      | 2,492      | 2,658                 | 657                          | 165                          |
| Other non-pain, n               | 2,336      | 2,910      | 3,103                 | 767                          | 193                          |
| <b>Deaths</b>                   |            |            |                       |                              |                              |
| HZ-related deaths, n            | 56         | 64         | 64                    | 8                            | 0                            |
| <b>Resource utilisation</b>     |            |            |                       |                              |                              |
| Hospitalisation, n              | 7,827      | 9,463      | 9,820                 | 1,993                        | 357                          |
| GP visits, n                    | 438,328    | 546,691    | 583,612               | 145,284                      | 36,921                       |

GP: general practitioner; HZ: herpes zoster; PHN: postherpetic neuralgia; n: number of cases; RZV: adjuvanted recombinant zoster vaccine; YOA: years of age; ZVL: zoster vaccine live.

Coverage for both RZV and ZVL was set to 48.3 %. Second-dose compliance for RZV was set to 70%.

**Table 3 NNV to avoid one case of HZ or PHN according to age at vaccination**

| Age cohort | NNV HZ |     | NNV PHN |     |
|------------|--------|-----|---------|-----|
|            | RZV    | ZVL | RZV     | ZVL |
| 50 YOA     | 10     | 39  | 69      | 328 |
| 60 YOA     | 9      | 27  | 55      | 171 |
| 65 YOA     | 10     | 23  | 54      | 134 |
| 70 YOA     | 12     | 45  | 65      | 98  |
| 80 YOA     | 17     | 156 | 82      | 258 |

RZV: adjuvanted recombinant zoster vaccine; HZ: herpes zoster ; YOA: years of age; ZVL: zoster vaccine live; NNV: number needed to vaccinate.

Coverage for both RZV and ZVL was set to 48.3 %. Second-dose compliance for RZV was set to 70%.

**Table 4 Reduction on resource utilisation per 100,000 people**

|        | GP visits avoided |       | Hospitalisations avoided |     |
|--------|-------------------|-------|--------------------------|-----|
|        | RZV               | ZVL   | RZV                      | ZVL |
| 50 YOA | 17,481            | 3,652 | 126                      | 17  |
| 60 YOA | 22,078            | 6,375 | 216                      | 42  |
| 65 YOA | 23,447            | 8,702 | 266                      | 69  |
| 70 YOA | 20,105            | 5,109 | 276                      | 49  |
| 80 YOA | 15,243            | 1,629 | 394                      | 42  |

GP: general practitioner; HZ: herpes zoster; RZV: adjuvanted recombinant zoster vaccine; YOA: years of age; ZVL: zoster vaccine live.

Coverage for both RZV and ZVL was set to 48.3 %. Second-dose compliance for RZV was set to 70%.

1  
2  
3 **Figure 1 Impact of increasing RZV coverage to 70% - Additional HZ and PHN cases avoided (light blue**  
4 **bars) comparing RZV vs no vaccination in people 70 YOA**  
5

6 HZ: herpes zoster; RZV: adjuvanted recombinant zoster vaccine; PHN: postherpetic neuralgia; YOA: years of age.

7  
8 Second-dose compliance for RZV was set to 70%.

9 **Figure 2 Impact of second-dose RZV compliance on HZ incidence**

10 HZ: herpes zoster; RZV: adjuvanted recombinant zoster vaccine; ZVL: zoster vaccine live

11  
12 **Figure 3 Scenario analyses: HZ (top) and PHN (down) cases avoided per 100,000 individuals for**  
13 **different vaccination cohorts.**  
14

15 HZ: herpes zoster; no vac: no vaccination; PHN: postherpetic neuralgia; RZV: adjuvanted recombinant zoster  
16 vaccine; YOA: years of age; ZVL: zoster vaccine live.

17  
18 Coverage for both RZV and ZVL was set to 48.3 %. Second dose compliance for RZV was set to 70%

19 **Figure 4 Tornado Diagram: HZ cases avoided with RZV compared with ZVL – Base-case analysis (70**  
20 **YOA; coverage 48.3%; compliance 70%)**  
21

22 HZ: herpes zoster; RZV: adjuvanted recombinant zoster vaccine; YOA: years of age; ZVL: zoster vaccine live.

23  
24 Lower values are in orange and upper values are in grey.

25 **Figure 5 Probabilistic Sensitivity Analysis: HZ cases avoided with RZV compared to ZVL**

26 HZ: herpes zoster; RZV: adjuvanted recombinant zoster vaccine; ZVL: zoster vaccine live.

27  
28  
29 The orange line shows the percentage of simulations averting at least the number of HZ cases shown on the x-axis.

30  
31 **Figure 6 Lay language summary of the study**  
32  
33  
34  
35  
36  
37  
38  
39  
40  
41  
42  
43  
44  
45  
46  
47  
48  
49  
50  
51  
52  
53  
54  
55  
56  
57  
58  
59  
60



Impact of increasing RZV coverage to 70% - Additional HZ and PHN cases avoided (light blue bars) comparing RZV vs no vaccination in people 70 YOA

109x75mm (300 x 300 DPI)

1  
2  
3  
4  
5  
6  
7  
8  
9  
10  
11  
12  
13  
14  
15  
16  
17  
18  
19  
20  
21  
22  
23  
24  
25  
26  
27  
28  
29  
30  
31  
32  
33  
34  
35  
36  
37  
38  
39  
40  
41  
42  
43  
44  
45  
46  
47  
48  
49  
50  
51  
52  
53  
54  
55  
56  
57  
58  
59  
60



Impact of second-dose RZV compliance on HZ incidence

103x72mm (300 x 300 DPI)



Scenario analyses: HZ (top) and PHN (down) cases avoided per 100,000 individuals for different vaccination cohorts.

81x80mm (300 x 300 DPI)

1  
2  
3  
4  
5  
6  
7  
8  
9  
10  
11  
12  
13  
14  
15  
16  
17  
18  
19  
20  
21  
22  
23  
24  
25  
26  
27  
28  
29  
30  
31  
32  
33  
34  
35  
36  
37  
38  
39  
40  
41  
42  
43  
44  
45  
46  
47  
48  
49  
50  
51  
52  
53  
54  
55  
56  
57  
58  
59  
60



Tornado Diagram: HZ cases avoided with RZV compared with ZVL – Base-case analysis (70 YOA; coverage 48.3%; compliance 70%)

81x60mm (300 x 300 DPI)



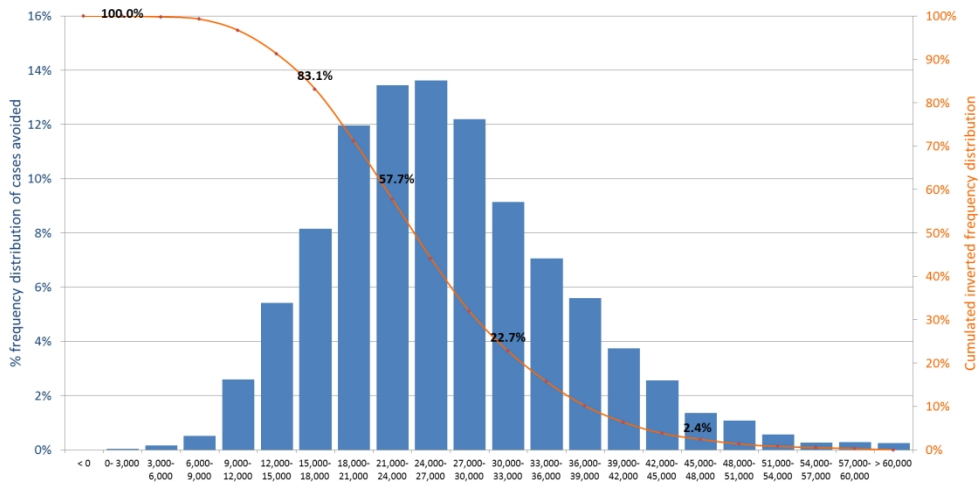

Probabilistic Sensitivity Analysis: HZ cases avoided with RZV compared to ZVL

177x86mm (300 x 300 DPI)



## Focus on the Patient

### What is the context?

Herpes zoster (shingles) is a painful rash that lasts for several weeks and which can lead to prolonged pain even after the initial rash has cleared. Herpes zoster arises when varicella zoster virus, acquired during varicella, reactivates. This happens especially in older people with a weakened immune system. Herpes zoster has a detrimental impact on the quality of life and current treatment options provide only partial symptom relief.

### What is new?

In the UK, a universal mass vaccination programme against herpes zoster has been introduced in 2013. The programme recommends vaccination of people aged 70 or 78 years with *Zostavax*, the only vaccine available at that time. In 2018, a new vaccine against herpes zoster, *Shingrix*, has become available. The goal of this study was to explore the impact of different vaccination strategies using a mathematical model.

### What is the impact?

The model predicts that *Shingrix* would lead to a greater reduction in the number of herpes zoster episodes compared to *Zostavax*. If adopting a vaccination strategy with *Shingrix*, the optimal age at vaccination would be 60 or 65 years old.

Lay language summary of the study

108x60mm (300 x 300 DPI)

1  
2  
3  
4  
5  
6  
7  
8  
9  
10  
11  
12  
13  
14  
15  
16  
17  
18  
19  
20  
21  
22  
23  
24  
25  
26  
27  
28  
29  
30  
31  
32  
33  
34  
35  
36  
37  
38  
39  
40  
41  
42  
43  
44  
45  
46  
47  
48  
49  
50  
51  
52  
53  
54  
55  
56  
57  
58  
59  
60

## Supplementary Material

# Evaluation of the public health impact of introducing a novel Adjuvanted Recombinant Zoster Vaccine into the UK universal mass vaccination programme

Van Oorschot Desirée, Hunjan Manjit, Bracke Benjamin, Lorenc Stéphane, Curran Desmond, Starkie Camejo Helen

BMJ Open

SI Figure 1: Schematic overview of the ZONA model

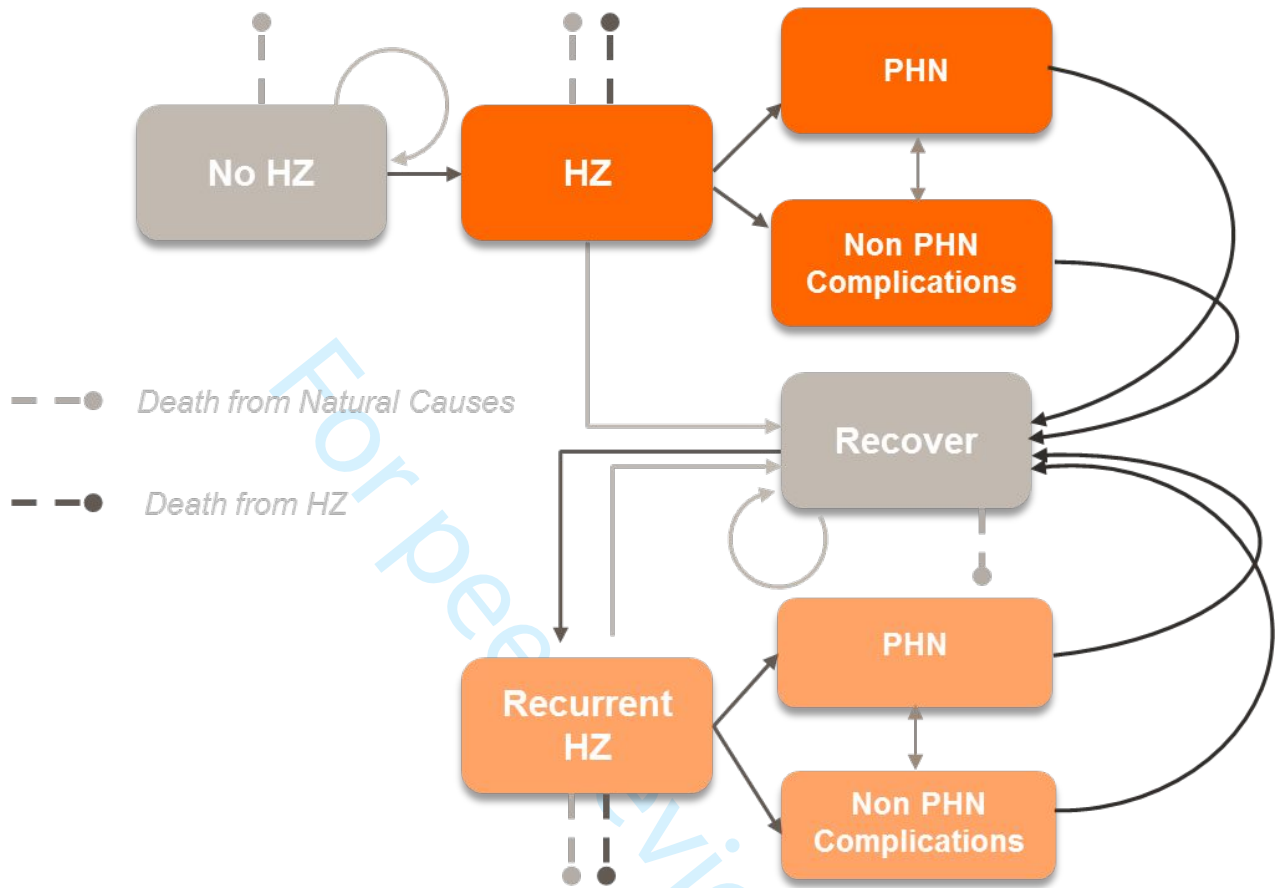

HZ: herpes zoster; PHN: postherpetic neuralgia.

Figure originally published in Curran et al. 2017.<sup>1</sup>

**SI Table 1: Mortality in the general UK population in 2018/2019**

| Age (YOA) | Number of deaths | Annual probability of death |
|-----------|------------------|-----------------------------|
| 50-54     | 15,903           | 0.00342                     |
| 55-59     | 22,590           | 0.00544                     |
| 60-64     | 29,886           | 0.008366                    |
| 65-69     | 45,562           | 0.013091                    |
| 70-74     | 65,747           | 0.021570                    |
| 75-79     | 78,692           | 0.036493                    |
| 80-84     | 104,536          | 0.065713                    |
| 85-89     | 114,461          | 0.117689                    |
| 90-94     | 82,948           | 0.198093                    |
| 95-99     | 33,361           | 0.304037                    |
| ≥ 100     | 5,496            | 0.436439                    |

YOA: years of age.

Projected numbers using data reported by the Office of National Statistics based on observed numbers of the UK population in 2014.<sup>2</sup>

The immunocompromised (IC) population was identified as individuals presenting one of the following conditions: Hematopoietic stem cell transplantation, solid organ transplantation, solid organ malignancies, haematological malignancies, human immunodeficiency virus, end-stage renal disease, corticosteroid exposure, other immunosuppressive therapy, other immunodeficiency conditions and autoimmune diseases (rheumatoid arthritis, systemic lupus erythematosus, inflammatory bowel disease, psoriasis, multiple sclerosis, polymyalgia rheumatica and autoimmune thyroiditis).<sup>3</sup>

Herpes Zoster (HZ) incidence for the whole (IC and IC-free) population was calculated by applying a weighting for IC proportion by age group.<sup>4</sup> A unitary weight across the populations was not deemed to be appropriate or robust as prevalence of herpes zoster varies between the age groups; rising with increasing age. This is because applying IC incidence, accounting for the overall proportion of IC (16.2%) irrespective of age group would underestimate the incidence in older people and overestimate it in younger people.

**SI Table 2: Weighting CPRD population for IC proportion by age**

| Age Group (YOA) | Prevalence of IC (%) | IC weighting | IC-free weighting |
|-----------------|----------------------|--------------|-------------------|
| 50-59           | 16.13                | 0.161        | 0.839             |
| 60-64           | 22.26                | 0.223        | 0.777             |
| 65-69           | 27.56                | 0.276        | 0.724             |
| 70-79           | 34.88                | 0.349        | 0.651             |
| ≥ 80            | 42.16                | 0.422        | 0.578             |

CPRD: Clinical Practice Research Datalink; IC: immunocompromised; IC-free: immunocompetent; YOA: years of age

**SI Table 3: Incidence and probability of HZ in the whole population**

| Age (YOA) | Incidence rate/1,000 patient years |         | Probability | Range       |             |
|-----------|------------------------------------|---------|-------------|-------------|-------------|
|           | IC                                 | IC-Free |             | Lower limit | Upper limit |
| 50-59     | 6.85                               | 4.9     | 0.0052      | 0.00375     | 0.00791     |
| 60-64     | 8.8                                | 6.92    | 0.0073      | 0.004392    | 0.009001    |
| 65-69     | 9.93                               | 8.62    | 0.0089      | 0.005108    | 0.010147    |
| 70-79     | 11.32                              | 11.04   | 0.0111      | 0.005975    | 0.011605    |
| ≥ 80      | 12.61                              | 11.02   | 0.0116      | 0.007363    | 0.013955    |

HZ: herpes zoster; IC: immunocompromised; IC-free: immunocompetent; YOA: years of age

**SI Table 4: Proportion of PHN (after 3 months)**

| Age (YOA) | Proportion (%) | Lower limit (%) | Upper limit (%) |
|-----------|----------------|-----------------|-----------------|
| 50-59     | 11.418         | 8.91            | 14.13           |
| 60-64     | 13.894         | 12.03           | 15.88           |
| 65-69     | 15.705         | 13.95           | 17.57           |
| 70-79     | 17.116         | 13.53           | 20.94           |
| ≥ 80      | 20.418         | 17.08           | 23.82           |

PHN: postherpetic neuralgia; YOA: years of age

**SI Table 5 HZ-associated mortality**

| Age (YOA) | Probability | Lower limit | Upper limit |
|-----------|-------------|-------------|-------------|
| 50-54     | 0.00001     | 0.0000063   | 0.000012    |
| 55-59     | 0.00001     | 0.0000063   | 0.000012    |
| 60-64     | 0.00003     | 0.0000189   | 0.000035    |
| 65-69     | 0.00003     | 0.0000189   | 0.000035    |
| 70-74     | 0.00004     | 0.0000245   | 0.000046    |
| 75-79     | 0.00009     | 0.0000644   | 0.000120    |
| 80-84     | 0.00049     | 0.0003409   | 0.000633    |
| 85-89     | 0.00202     | 0.0014126   | 0.002623    |
| 90-94     | 0.00202     | 0.0014126   | 0.002623    |
| 95-99     | 0.00202     | 0.0014126   | 0.002623    |
| ≥ 100     | 0.00202     | 0.0014126   | 0.002623    |

HZ: herpes zoster; YOA: years of age

**SI Table 6: Hospitalisation rates in IC and IC-free cohort, derived from CPRD database**

| Age (YOA) | IC                         | IC-free                    | ALL               |
|-----------|----------------------------|----------------------------|-------------------|
|           | Mean<br>Events 90-365 days | Mean<br>Events 90-365 days | Weighted Average* |
| 50-59     | 0.044                      | 0.007                      | 0.012622          |
| 60-64     | 0.054                      | 0.009                      | 0.019245          |
| 65-69     | 0.050                      | 0.014                      | 0.023713          |
| 70-79     | 0.074                      | 0.030                      | 0.045143          |
| ≥ 80      | 0.168                      | 0.115                      | 0.135529          |

CPRD: Clinical Practice Research Datalink; IC: immunocompromised; IC-free: immunocompetent; YOA: years of age; IC-free: immunocompetent

\*Weighted averages calculated using IC proportions in the CPRD study.

**SI Table 7 GP visits in IC and IC-free cohort, derived from CPRD database**

| Age (YOA) | IC                         | IC-free                    | ALL               |
|-----------|----------------------------|----------------------------|-------------------|
|           | Mean<br>Events 90-365 days | Mean<br>Events 90-365 days | Weighted Average* |
| 50-59     | 3.75                       | 2.69                       | 2.86              |
| 60-64     | 4.41                       | 2.86                       | 3.20              |
| 65-69     | 5.05                       | 3.19                       | 3.70              |
| 70-79     | 5.75                       | 4.09                       | 4.67              |
| ≥ 80      | 6.15                       | 4.59                       | 5.25              |

\*Weighted averages calculated using IC proportions in the CPRD study.

CPRD: Clinical Practice Research Datalink; GP: general practitioner; IC: immunocompromised; IC-free: immunocompetent; YOA: years of age

**SI Table 8: Vaccine Efficacy against HZ and PHN**

| Age (YOA)  | ZVL      |             |             | RZV – 2-dose |             |             | RZV – 1-dose |             |             |
|------------|----------|-------------|-------------|--------------|-------------|-------------|--------------|-------------|-------------|
|            | Efficacy | Lower limit | Upper limit | Efficacy     | Lower limit | Upper limit | Efficacy     | Lower limit | Upper limit |
| <b>HZ</b>  |          |             |             |              |             |             |              |             |             |
| 50-59      | 0.698    | 0.5410      | 0.8060      | 0.984        | 0.9500      | 1.0000      | 0.9          | 0.5890      | 0.9890      |
| 60-64      | 0.6389   | 0.5600      | 0.7100      | 0.984        | 0.9500      | 1.0000      | 0.9          | 0.5890      | 0.9890      |
| 65-69      | 0.6389   | 0.5600      | 0.7100      | 0.984        | 0.9500      | 1.0000      | 0.9          | 0.5890      | 0.9890      |
| 70-79      | 0.4085   | 0.2800      | 0.5200      | 0.9784       | 0.9410      | 1.0000      | 0.695        | 0.2490      | 0.8910      |
| ≥ 80       | 0.1825   | 0.0000      | 0.4800      | 0.9784       | 0.9410      | 1.0000      | 0.695        | 0.2490      | 0.8910      |
| <b>PHN</b> |          |             |             |              |             |             |              |             |             |
| 50-59      | 0.698    | 0.3080      | 0.8960      | 0.984        | 0.9500      | 1.0000      | 0.9          | 0.5890      | 0.9890      |
| 60-64      | 0.6569   | 0.2540      | 0.8420      | 0.984        | 0.9500      | 1.0000      | 0.9          | 0.5890      | 0.9890      |
| 65-69      | 0.6569   | 0.2540      | 0.8420      | 0.984        | 0.9500      | 1.0000      | 0.9          | 0.5890      | 0.9890      |
| 70-79      | 0.7338   | 0.5160      | 0.8580      | 0.9784       | 0.9410      | 1.0000      | 0.695        | 0.2490      | 0.8910      |
| ≥ 80       | 0.3951   | 0.0000      | 0.7380      | 0.9784       | 0.9410      | 1.0000      | 0.695        | 0.2490      | 0.8910      |

HZ: herpes zoster; PHN: postherpetic neuralgia; RZV: adjuvanted recombinant zoster vaccine; YOA: years of age; ZVL: zoster vaccine live

**SI Table 9: Vaccine Waning**

| Vaccine      | Age group (YOA)/years after vaccination | Value  | 5% CI  | 95% CI |
|--------------|-----------------------------------------|--------|--------|--------|
| ZVL – 1-dose | All ages/Years 1-4                      | 0.0543 | 0.0450 | 0.0640 |
|              | All ages/Years 4+                       | 0.0510 | 0.0410 | 0.0600 |
| RZV – 2-dose | < 70 YOA/Years 1-4                      | 0.010  | 0.0000 | 0.0260 |
|              | < 70 YOA/Years 4+                       | 0.0230 | 0.0070 | 0.0460 |
|              | ≥70 YOA/ all years after vaccination    | 0.0360 | 0.0140 | 0.0660 |
| RZV – 1-dose | All ages/Years 1-4                      | 0.0543 | 0.0450 | 0.0640 |
|              | All ages/Years 4+                       | 0.0510 | 0.0410 | 0.0600 |

CI: confidence interval; RZV: adjuvanted recombinant zoster vaccine; YOA: years of age; ZVL: zoster vaccine live



**REFERENCES**

1. Curran D, Van Oorschot D, Varghese L, et al. Assessment of the potential public health impact of Herpes Zoster vaccination in Germany. *Hum Vaccin Immunother* 2017;**13**(10):2213-21. doi: 10.1080/21645515.2017.1345399
2. Office of National Statistics. 2014 based National population projections. available from: <https://www.ons.gov.uk/file?uri=/peoplepopulationandcommunity/populationandmigration/populationprojections/datasets/localauthoritiesinenglandtable2/2014based/table2.xls> [accessed June 13, 2018].
3. Yanni EA, Ferreira G, Guennec M, et al. Burden of herpes zoster in 16 selected immunocompromised populations in England: a cohort study in the Clinical Practice Research Datalink 2000–2012. *BMJ Open* 2018;**8**(6). doi:10.1136/bmjopen-2017-020528
4. Curran D, Hunjan M, El Ghachi A, et al. Herpes Zoster Related Healthcare Burden And Costs In Both Immunocompromised (IC) And IC-Free Populations In The United Kingdom. *Value Health* 2017;**20**(9):A786. doi:10.1016/j.jval.2017.08.2296

1  
2  
3  
4  
5  
6  
7  
8  
9  
10  
11  
12  
13  
14  
15  
16  
17  
18  
19  
20  
21  
22  
23  
24  
25  
26  
27  
28  
29  
30  
31  
32  
33  
34  
35  
36  
37  
38  
39  
40  
41  
42  
43  
44  
45  
46  
47

| Section/Item                    | Item no | Recommendation                                                                                                                                                                         | Reported on page no/line no | Comment                                                                                                                                                                                                                                                                                                                                                                                                                             |
|---------------------------------|---------|----------------------------------------------------------------------------------------------------------------------------------------------------------------------------------------|-----------------------------|-------------------------------------------------------------------------------------------------------------------------------------------------------------------------------------------------------------------------------------------------------------------------------------------------------------------------------------------------------------------------------------------------------------------------------------|
| <b>Title and abstract</b>       |         |                                                                                                                                                                                        |                             |                                                                                                                                                                                                                                                                                                                                                                                                                                     |
| Title                           | 1       | Identify the study as an economic evaluation or use more specific terms such as “cost-effectiveness analysis”, and describe the interventions compared                                 | p 1                         | Strictly speaking, this is not an economic evaluation but public health impact study, as stated in the title                                                                                                                                                                                                                                                                                                                        |
| Abstract                        | 2       | Provide a structured summary of objectives, perspective, setting, methods (including study design and inputs), results (including base case and uncertainty analyses), and conclusions | P 4/5                       |                                                                                                                                                                                                                                                                                                                                                                                                                                     |
| <b>Introduction</b>             |         |                                                                                                                                                                                        |                             |                                                                                                                                                                                                                                                                                                                                                                                                                                     |
| Background and Objectives       | 3       | Provide an explicit statement of the broader context for the study. Present the study question and its relevance for health policy or practice decisions                               | p. 7<br>p. 8                | Context provided in first paragraph (epidemiology and rise of HZ episodes during past decades)<br>“The objective of this study is to explore the public health impact of introducing the RZV vaccine in the UK in the routine population 70 YOA.”                                                                                                                                                                                   |
| <b>Methods</b>                  |         |                                                                                                                                                                                        |                             |                                                                                                                                                                                                                                                                                                                                                                                                                                     |
| Target population and subgroups | 4       | Describe characteristics of the base case population and subgroups analysed, including why they were chosen                                                                            | p. 8<br>p. 8/p. 12          | See sentence above for base-case scenario (routine population 70 YOA).<br>“Different scenario analyses are carried out to assess the impact of first dose RZV coverage and second dose RZV compliance and to determine the optimal age for vaccination.”<br>Base-case was chosen because representing the current routine vaccination cohort in the UK.<br>Scenario analyses chosen to test uncertainties in coverage and potential |

|                               |     |                                                                                                                                        |              |                                                                                                                                                                                                                                                                        |
|-------------------------------|-----|----------------------------------------------------------------------------------------------------------------------------------------|--------------|------------------------------------------------------------------------------------------------------------------------------------------------------------------------------------------------------------------------------------------------------------------------|
|                               |     |                                                                                                                                        |              | differences in optimal vaccination age between RZV and ZVL as explained on page 12.                                                                                                                                                                                    |
| Setting and location          | 5   | State relevant aspects of the system(s) in which the decision(s) need(s) to be made                                                    | p. 8<br>p. 9 | UK setting where there is UMV currently in place.<br>“The ZOster ecoNomic Analysis (ZONA), a static multi-cohort Markov model previously developed using Microsoft Excel, was adapted to the UK setting”                                                               |
| Study perspective             | 6   | Describe the perspective of the study and relate this to the costs being evaluated                                                     | NA           | Public health impact study, not cost-effectiveness study.                                                                                                                                                                                                              |
| Comparators                   | 7   | Describe the interventions or strategies being compared and state why they were chosen                                                 | p. 9<br>p. 8 | Vaccination with RZV, with ZVL and no vaccination<br><br>UK setting with current UMV with ZVL<br>And a small portion of patients contraindicated to ZVL (no vaccination)                                                                                               |
| Time horizon                  | 8   | State the time horizon(s) over which costs and consequences are being evaluated and say why appropriate                                | p. 10        | “Cycle length is set to one year and a life-long time horizon is assumed.”                                                                                                                                                                                             |
| Discount rate                 | 9   | Report the choice of discount rate(s) used for costs and outcomes and say why appropriate                                              | NA           | Public health impact study, not cost-effectiveness study.                                                                                                                                                                                                              |
| Choice of health outcomes     | 10  | Describe what outcomes were used as the measure(s) of benefit in the evaluation and their relevance for the type of analysis performed | p. 12        | “The model was used to estimate the avoidance of HZ and PHN cases, complications, deaths, GP visits and hospitalisations cases, complications due to HZ, HZ-related deaths and number of GP visits and hospitalisations for three different vaccination strategies...” |
| Measurements of effectiveness | 11a | Single study-based estimates: Describe fully the design features of the single effectiveness study and why the single study            | NA           |                                                                                                                                                                                                                                                                        |

1  
2  
3  
4  
5  
6  
7  
8  
9  
10  
11  
12  
13  
14  
15  
16  
17  
18  
19  
20  
21  
22  
23  
24  
25  
26  
27  
28  
29  
30  
31  
32  
33  
34  
35  
36  
37  
38  
39  
40  
41  
42  
43  
44  
45  
46  
47

|                                         |     |                                                                                                                                                                                                                                                                                                                        |       |                                                                                                                                                                                                                                                                                                                                      |
|-----------------------------------------|-----|------------------------------------------------------------------------------------------------------------------------------------------------------------------------------------------------------------------------------------------------------------------------------------------------------------------------|-------|--------------------------------------------------------------------------------------------------------------------------------------------------------------------------------------------------------------------------------------------------------------------------------------------------------------------------------------|
|                                         |     | was a sufficient source of clinical effectiveness data                                                                                                                                                                                                                                                                 |       |                                                                                                                                                                                                                                                                                                                                      |
|                                         | 11b | Synthesis-based estimates: Describe fully the methods used for identification of included studies and synthesis of clinical effectiveness data                                                                                                                                                                         | p. 11 | “Vaccine efficacy against HZ and PHN ( $VE_{HZ}$ and $VE_{PHN}$ , respectively) were derived from the SPS trial and the Zoster Efficacy and Safety Study (ZEST) for ZVL and from the ZOE-50 and ZOE-70 trials for RZV (Table 1, SI Table 8).”<br>And following paragraphs for efficacy/waning                                        |
| Measurement of valuation based outcomes | 12  | If applicable, describe the population and methods used to elicit preferences for outcomes                                                                                                                                                                                                                             | NA    | Public health impact study, not cost-effectiveness study.                                                                                                                                                                                                                                                                            |
| Estimating resources and costs          | 13a | Single study-based economic evaluation: Describe approaches used to estimate resource use associated with the alternative interventions.<br>Describe primary or secondary research methods for valuing each resource item in terms of its unit cost. Describe any adjustments made to approximate to opportunity costs | NA    |                                                                                                                                                                                                                                                                                                                                      |
|                                         | 13b | Model-based economic evaluation: Describe approaches and data sources used to estimate resource use associated with model health states. Describe primary or secondary research methods for valuing each resource item in terms of its unit cost. Describe any adjustments made to approximate to opportunity costs    | P. 11 | “The CPRD study was used to derive the proportion of patients being hospitalised or visiting their GP due to HZ-related complications. Hospitalisation rates were higher in the IC cohort for all age-groups. In addition, health-care resource use was higher in older adults (SI Tables 6 & 7).”<br>No unit costs, since PHI study |
| Currency, price date, and conversion    | 14  | Report the dates of the estimated resource quantities and unit costs. Describe methods for adjusting estimated unit costs to the year of reported costs if necessary. Describe                                                                                                                                         | NA    |                                                                                                                                                                                                                                                                                                                                      |

|                    |    |                                                                                                                                                                                                                                                                                                                                                      |                                               |                                                                                                                                                                                                                                                                                                                                                 |
|--------------------|----|------------------------------------------------------------------------------------------------------------------------------------------------------------------------------------------------------------------------------------------------------------------------------------------------------------------------------------------------------|-----------------------------------------------|-------------------------------------------------------------------------------------------------------------------------------------------------------------------------------------------------------------------------------------------------------------------------------------------------------------------------------------------------|
|                    |    | methods for converting costs into a common currency base and the exchange rate                                                                                                                                                                                                                                                                       |                                               |                                                                                                                                                                                                                                                                                                                                                 |
| Choice of model    | 15 | Describe and give reasons for the specific type of decision-analytical model used. Providing a figure to show model structure is strongly recommended                                                                                                                                                                                                | p. 9                                          | “The ZOster ecoNomic Analysis (ZONA), a static multi-cohort Markov model previously developed using Microsoft Excel, was adapted to the UK setting.”<br>Reference is made to Curran et al, 2017 which shows Figure and additional details regarding model structure                                                                             |
| Assumptions        | 16 | Describe all structural or other assumptions underpinning the decision analytical model                                                                                                                                                                                                                                                              | p. 9<br><br>p. 12                             | First paragraph (Model structure) and Curran et al, 2017<br><br>Coverage and compliance assumptions: “In the base-case analysis, coverage is set at 48.3% in line with latest coverage numbers for the UK. The impact of different coverage rates was assessed in sensitivity analyses. Compliance with the second-dose of RZV was set to 70%.” |
| Analytical methods | 17 | Describe all analytical methods supporting the evaluation. This could include methods for dealing with skewed, missing, or censored data; extrapolation methods; methods for pooling data; approaches to validate or make adjustments (such as half cycle corrections) to a model; and methods for handling population heterogeneity and uncertainty | p. 12<br><br>p. 13                            | “Different scenario analyses were carried out where assumptions regarding vaccination coverage and compliance and age at vaccination were changed”<br>And rest of paragraph<br><br>Sensitivity analyses (DSA and PSA) described                                                                                                                 |
| <b>Results</b>     |    |                                                                                                                                                                                                                                                                                                                                                      |                                               |                                                                                                                                                                                                                                                                                                                                                 |
| Study parameters   | 18 | Report the values, ranges, references, and, if used, probability distributions for all parameters. Report reasons or sources for distributions used to represent uncertainty where appropriate. Providing a table to                                                                                                                                 | p. 15<br>SI Tables 3 – 5<br>and Tables 8 - 11 | “In DSA analyses carried out for the base-case scenario in the age-cohort 70 YOA, the robustness of results was tested by changing input parameters to their lower and upper estimated confidence ranges (SI Tables 3 – 5;                                                                                                                      |

|                                                                      |     |                                                                                                                                                                                                                                                                           |                                                            |                                                                                                                                                                                                                                                            |
|----------------------------------------------------------------------|-----|---------------------------------------------------------------------------------------------------------------------------------------------------------------------------------------------------------------------------------------------------------------------------|------------------------------------------------------------|------------------------------------------------------------------------------------------------------------------------------------------------------------------------------------------------------------------------------------------------------------|
|                                                                      |     | show the input values is strongly recommended                                                                                                                                                                                                                             |                                                            | SI Tables 8 - 11)"                                                                                                                                                                                                                                         |
| Incremental costs and outcomes                                       | 19  | For each intervention, report mean values for the main categories of estimated costs and outcomes of interest, as well as mean differences between the comparator groups. If applicable, report incremental cost-effectiveness ratios                                     | p. 14<br>Table 2                                           | "In the base-case scenario (cohort 70 YOA) RZV reduced the number of HZ and PHN cases by 30,262 and 5,409, respectively, compared to no vaccination. ZVL led to a reduction of 7,909 HZ and 3,567 PHN cases ( <b>Error! Reference source not found.</b> )" |
| Characterising uncertainty                                           | 20a | Single study-based economic evaluation: Describe the effects of sampling uncertainty for the estimated incremental cost and incremental effectiveness parameters, together with the impact of methodological assumptions (such as discount rate, study perspective)       | NA                                                         |                                                                                                                                                                                                                                                            |
|                                                                      | 20b | Model-based economic evaluation: Describe the effects on the results of uncertainty for all input parameters, and uncertainty related to the structure of the model and assumptions                                                                                       | p. 13/14<br>Figure 1-3<br>Table 3<br><br>p. 15<br>Figure 4 | Scenario analyses<br><br>Sensitivity analyses                                                                                                                                                                                                              |
| Characterising heterogeneity                                         | 21  | If applicable, report differences in costs, outcomes, or cost-effectiveness that can be explained by variations between subgroups of patients with different baseline characteristics or other observed variability in effects that are not reducible by more information | p. 14<br>Figure 3                                          | Subgroup analyses according to age cohorts                                                                                                                                                                                                                 |
| Discussion                                                           |     |                                                                                                                                                                                                                                                                           |                                                            |                                                                                                                                                                                                                                                            |
| Study findings, limitations, generalisability, and current knowledge | 22  | Summarise key study findings and describe how they support the conclusions reached. Discuss limitations and the generalisability of the findings and how the findings fit with current knowledge                                                                          | p. 15                                                      | "In the base-case considering the current vaccination cohort of people 70 YOA, RZV reduced the number of HZ and PHN cases by 30,262 and 5,409 compared to no vaccination..." and subsequent paragraphs                                                     |

|                       |    |                                                                                                                                                                                                                                                  |          |                                                                                                                |
|-----------------------|----|--------------------------------------------------------------------------------------------------------------------------------------------------------------------------------------------------------------------------------------------------|----------|----------------------------------------------------------------------------------------------------------------|
|                       |    |                                                                                                                                                                                                                                                  | p. 18    | “As with every model, there are strengths and limitations associated with the modelling strategy employed....” |
|                       |    |                                                                                                                                                                                                                                                  | p. 17/18 | Comparison to existing PHI and CE studies.                                                                     |
| Other                 |    |                                                                                                                                                                                                                                                  |          |                                                                                                                |
| Source of funding     | 23 | Describe how the study was funded and the role of the funder in the identification, design, conduct, and reporting of the analysis. Describe other non-monetary sources of support                                                               | p. 20    | Funding                                                                                                        |
| Conflicts of interest | 24 | Describe any potential for conflict of interest of study contributors in accordance with journal policy. In the absence of a journal policy, we recommend authors comply with International Committee of Medical Journal Editors recommendations | p. 20    | Conflict of interest                                                                                           |
