# Supplementary material for: Public health impact model estimating the impact of introducing an adjuvanted recombinant zoster vaccine into the UK universal mass vaccination programme
Source: PubMed Central journal article supplement — BMJ Open. 2019 May 5;9(5):e025553. doi: 10.1136/bmjopen-2018-025553 (PMC6502027; doi:10.1136/bmjopen-2018-025553), 2019-05-05
Supplement: bmjopen-2018-025553supp001.pdf [file bmjopen-2018-025553supp001.pdf]

## Supplementary Material

# Evaluation of the public health impact of introducing a novel Adjuvanted Recombinant Zoster Vaccine into the UK universal mass vaccination programme

Van Oorschot Desirée, Hunjan Manjit, Bracke Benjamin, Lorenc Stéphane, Curran Desmond, Starkie Camejo Helen

BMJ Open

SI Figure 1: Schematic overview of the ZONA model

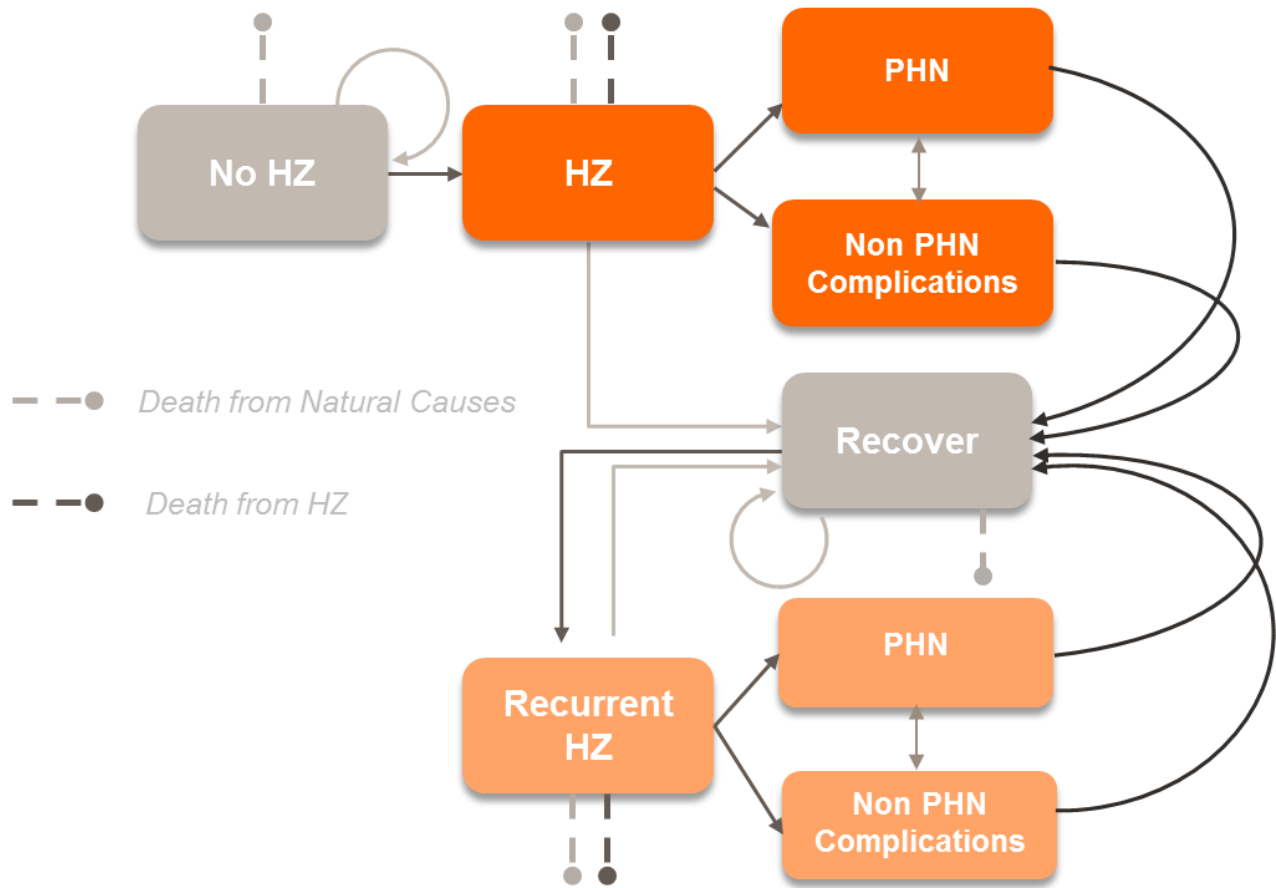

HZ: herpes zoster; PHN: postherpetic neuralgia.

Figure originally published in Curran et al. 2017.<sup>1</sup>

**SI Table 1: Mortality in the general UK population in 2018/2019**

| Age (YOA) | Number of deaths | Annual probability of death |
|-----------|------------------|-----------------------------|
| 50-54     | 15,903           | 0.00342                     |
| 55-59     | 22,590           | 0.00544                     |
| 60-64     | 29,886           | 0.008366                    |
| 65-69     | 45,562           | 0.013091                    |
| 70-74     | 65,747           | 0.021570                    |
| 75-79     | 78,692           | 0.036493                    |
| 80-84     | 104,536          | 0.065713                    |
| 85-89     | 114,461          | 0.117689                    |
| 90-94     | 82,948           | 0.198093                    |
| 95-99     | 33,361           | 0.304037                    |
| ≥ 100     | 5,496            | 0.436439                    |

YOA: years of age.

Projected numbers using data reported by the Office of National Statistics based on observed numbers of the UK population in 2014.<sup>2</sup>

The immunocompromised (IC) population was identified as individuals presenting one of the following conditions: Hematopoietic stem cell transplantation, solid organ transplantation, solid organ malignancies, haematological malignancies, human immunodeficiency virus, end-stage renal disease, corticosteroid exposure, other immunosuppressive therapy, other immunodeficiency conditions and autoimmune diseases (rheumatoid arthritis, systemic lupus erythematosus, inflammatory bowel disease, psoriasis, multiple sclerosis, polymyalgia rheumatica and autoimmune thyroiditis).<sup>3</sup>

Herpes Zoster (HZ) incidence for the whole (IC and IC-free) population was calculated by applying a weighting for IC proportion by age group.<sup>4</sup> A unitary weight across the populations was not deemed to be appropriate or robust as prevalence of herpes zoster varies between the age groups; rising with increasing age. This is because applying IC incidence, accounting for the overall proportion of IC (16.2%) irrespective of age group would underestimate the incidence in older people and overestimate it in younger people.

**SI Table 2: Weighting CPRD population for IC proportion by age**

| Age Group (YOA) | Prevalence of IC (%) | IC weighting | IC-free weighting |
|-----------------|----------------------|--------------|-------------------|
| 50-59           | 16.13                | 0.161        | 0.839             |
| 60-64           | 22.26                | 0.223        | 0.777             |
| 65-69           | 27.56                | 0.276        | 0.724             |
| 70-79           | 34.88                | 0.349        | 0.651             |
| ≥ 80            | 42.16                | 0.422        | 0.578             |

CPRD: Clinical Practice Research Datalink; IC: immunocompromised; IC-free: immunocompetent; YOA: years of age

**SI Table 3: Incidence and probability of HZ in the whole population**

| Age (YOA) | Incidence rate/1,000 patient years |         | Probability | Range       |             |
|-----------|------------------------------------|---------|-------------|-------------|-------------|
|           | IC                                 | IC-Free |             | Lower limit | Upper limit |
| 50-59     | 6.85                               | 4.9     | 0.0052      | 0.00375     | 0.00791     |
| 60-64     | 8.8                                | 6.92    | 0.0073      | 0.004392    | 0.009001    |
| 65-69     | 9.93                               | 8.62    | 0.0089      | 0.005108    | 0.010147    |
| 70-79     | 11.32                              | 11.04   | 0.0111      | 0.005975    | 0.011605    |
| ≥ 80      | 12.61                              | 11.02   | 0.0116      | 0.007363    | 0.013955    |

HZ: herpes zoster; IC: immunocompromised; IC-free: immunocompetent; YOA: years of age

**SI Table 4: Proportion of PHN (after 3 months)**

| Age (YOA) | Proportion (%) | Lower limit (%) | Upper limit (%) |
|-----------|----------------|-----------------|-----------------|
| 50-59     | 11.418         | 8.91            | 14.13           |
| 60-64     | 13.894         | 12.03           | 15.88           |
| 65-69     | 15.705         | 13.95           | 17.57           |
| 70-79     | 17.116         | 13.53           | 20.94           |
| ≥ 80      | 20.418         | 17.08           | 23.82           |

PHN: postherpetic neuralgia; YOA: years of age

**SI Table 5 HZ-associated mortality**

| Age (YOA) | Probability | Lower limit | Upper limit |
|-----------|-------------|-------------|-------------|
| 50-54     | 0.00001     | 0.0000063   | 0.000012    |
| 55-59     | 0.00001     | 0.0000063   | 0.000012    |
| 60-64     | 0.00003     | 0.0000189   | 0.000035    |
| 65-69     | 0.00003     | 0.0000189   | 0.000035    |
| 70-74     | 0.00004     | 0.0000245   | 0.000046    |
| 75-79     | 0.00009     | 0.0000644   | 0.000120    |
| 80-84     | 0.00049     | 0.0003409   | 0.000633    |
| 85-89     | 0.00202     | 0.0014126   | 0.002623    |
| 90-94     | 0.00202     | 0.0014126   | 0.002623    |
| 95-99     | 0.00202     | 0.0014126   | 0.002623    |
| ≥ 100     | 0.00202     | 0.0014126   | 0.002623    |

HZ: herpes zoster; YOA: years of age

**SI Table 6: Hospitalisation rates in IC and IC-free cohort, derived from CPRD database**

| Age (YOA) | IC                         | IC-free                    | ALL               |
|-----------|----------------------------|----------------------------|-------------------|
|           | Mean<br>Events 90-365 days | Mean<br>Events 90-365 days | Weighted Average* |
| 50-59     | 0.044                      | 0.007                      | 0.012622          |
| 60-64     | 0.054                      | 0.009                      | 0.019245          |
| 65-69     | 0.050                      | 0.014                      | 0.023713          |
| 70-79     | 0.074                      | 0.030                      | 0.045143          |
| ≥ 80      | 0.168                      | 0.115                      | 0.135529          |

CPRD: Clinical Practice Research Datalink; IC: immunocompromised; IC-free: immunocompetent; YOA: years of age; IC-free: immunocompetent

\*Weighted averages calculated using IC proportions in the CPRD study.

**SI Table 7 GP visits in IC and IC-free cohort, derived from CPRD database**

| Age (YOA) | IC                         | IC-free                    | ALL               |
|-----------|----------------------------|----------------------------|-------------------|
|           | Mean<br>Events 90-365 days | Mean<br>Events 90-365 days | Weighted Average* |
| 50-59     | 3.75                       | 2.69                       | 2.86              |
| 60-64     | 4.41                       | 2.86                       | 3.20              |
| 65-69     | 5.05                       | 3.19                       | 3.70              |
| 70-79     | 5.75                       | 4.09                       | 4.67              |
| ≥ 80      | 6.15                       | 4.59                       | 5.25              |

\*Weighted averages calculated using IC proportions in the CPRD study.

CPRD: Clinical Practice Research Datalink; GP: general practitioner; IC: immunocompromised; IC-free: immunocompetent; YOA: years of age

**SI Table 8: Vaccine Efficacy against HZ and PHN**

| Age (YOA)  | ZVL      |             |             | RZV – 2-dose |             |             | RZV – 1-dose |             |             |
|------------|----------|-------------|-------------|--------------|-------------|-------------|--------------|-------------|-------------|
|            | Efficacy | Lower limit | Upper limit | Efficacy     | Lower limit | Upper limit | Efficacy     | Lower limit | Upper limit |
| <b>HZ</b>  |          |             |             |              |             |             |              |             |             |
| 50-59      | 0.698    | 0.5410      | 0.8060      | 0.984        | 0.9500      | 1.0000      | 0.9          | 0.5890      | 0.9890      |
| 60-64      | 0.6389   | 0.5600      | 0.7100      | 0.984        | 0.9500      | 1.0000      | 0.9          | 0.5890      | 0.9890      |
| 65-69      | 0.6389   | 0.5600      | 0.7100      | 0.984        | 0.9500      | 1.0000      | 0.9          | 0.5890      | 0.9890      |
| 70-79      | 0.4085   | 0.2800      | 0.5200      | 0.9784       | 0.9410      | 1.0000      | 0.695        | 0.2490      | 0.8910      |
| ≥ 80       | 0.1825   | 0.0000      | 0.4800      | 0.9784       | 0.9410      | 1.0000      | 0.695        | 0.2490      | 0.8910      |
| <b>PHN</b> |          |             |             |              |             |             |              |             |             |
| 50-59      | 0.698    | 0.3080      | 0.8960      | 0.984        | 0.9500      | 1.0000      | 0.9          | 0.5890      | 0.9890      |
| 60-64      | 0.6569   | 0.2540      | 0.8420      | 0.984        | 0.9500      | 1.0000      | 0.9          | 0.5890      | 0.9890      |
| 65-69      | 0.6569   | 0.2540      | 0.8420      | 0.984        | 0.9500      | 1.0000      | 0.9          | 0.5890      | 0.9890      |
| 70-79      | 0.7338   | 0.5160      | 0.8580      | 0.9784       | 0.9410      | 1.0000      | 0.695        | 0.2490      | 0.8910      |
| ≥ 80       | 0.3951   | 0.0000      | 0.7380      | 0.9784       | 0.9410      | 1.0000      | 0.695        | 0.2490      | 0.8910      |

HZ: herpes zoster; PHN: postherpetic neuralgia; RZV: adjuvanted recombinant zoster vaccine; YOA: years of age; ZVL: zoster vaccine live

**SI Table 9: Vaccine Waning**

| Vaccine      | Age group (YOA)/years after vaccination | Value  | 5% CI  | 95% CI |
|--------------|-----------------------------------------|--------|--------|--------|
| ZVL – 1-dose | All ages/Years 1-4                      | 0.0543 | 0.0450 | 0.0640 |
|              | All ages/Years 4+                       | 0.0510 | 0.0410 | 0.0600 |
| RZV – 2-dose | < 70 YOA/Years 1-4                      | 0.010  | 0.0000 | 0.0260 |
|              | < 70 YOA/Years 4+                       | 0.0230 | 0.0070 | 0.0460 |
|              | ≥70 YOA/ all years after vaccination    | 0.0360 | 0.0140 | 0.0660 |
| RZV – 1-dose | All ages/Years 1-4                      | 0.0543 | 0.0450 | 0.0640 |
|              | All ages/Years 4+                       | 0.0510 | 0.0410 | 0.0600 |

CI: confidence interval; RZV: adjuvanted recombinant zoster vaccine; YOA: years of age; ZVL: zoster vaccine live

## REFERENCES

1. Curran D, Van Oorschot D, Varghese L, et al. Assessment of the potential public health impact of Herpes Zoster vaccination in Germany. *Hum Vaccin Immunother* 2017;**13**(10):2213-21. doi: 10.1080/21645515.2017.1345399
2. Office of National Statistics. 2014 based National population projections. available from: <https://www.ons.gov.uk/file?uri=/peoplepopulationandcommunity/populationandmigration/populationprojections/datasets/localauthoritiesinenglandtable2/2014based/table2.xls> [accessed June 13, 2018].
3. Yanni EA, Ferreira G, Guennec M, et al. Burden of herpes zoster in 16 selected immunocompromised populations in England: a cohort study in the Clinical Practice Research Datalink 2000–2012. *BMJ Open* 2018;**8**(6). doi:10.1136/bmjopen-2017-020528
4. Curran D, Hunjan M, El Ghachi A, et al. Herpes Zoster Related Healthcare Burden And Costs In Both Immunocompromised (IC) And IC-Free Populations In The United Kingdom. *Value Health* 2017;**20**(9):A786. doi:10.1016/j.jval.2017.08.2296
